# Supplementary material for: Chiral (phosphine)-(imidazoline) PCN pincer palladium(ii) complexes: synthesis and application in asymmetric hydrophosphination of 2-alkenoylpyridines with diphenylphosphine
Source: Royal Society of Chemistry journal article supplement (doi:10.1039/d2dt01078j), 2022-01-01
Supplement: d2dt01078j1.pdf [file d2dt01078j1.pdf]

## Supporting Information

### **Chiral (phosphine)-(imidazoline) PCN pincer palladium(II) complexes: synthesis and application in asymmetric hydrophosphination of 2-alkenoylpyridines with diphenylphosphine**

Jun-Jian Huang, Xiao-Qi Zhang, Jing-Jing Yang, Jun-Fang Gong\* and Mao-Ping Song\*

*College of Chemistry, Green Catalysis Center, Zhengzhou University, Zhengzhou 450001,  
China*

E-mail: gongjf@zzu.edu.cn (J.-F. Gong) or mpson@zzu.edu.cn (M.-P. Song).

|                                                                                                |     |
|------------------------------------------------------------------------------------------------|-----|
| X-ray diffraction studies of complexes <b>3c</b> , <b>3e</b> , <b>3i</b> , and <b>3k</b> ..... | S2  |
| NMR Spectra.....                                                                               | S5  |
| HPLC Spectra.....                                                                              | S65 |

**X-ray diffraction studies of complexes 3c, 3e, 3i, and 3k.**

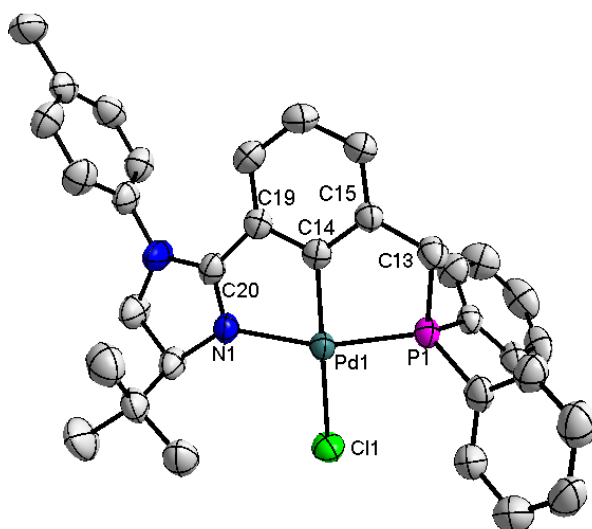

**Figure S1.** Molecular structure of complex **3c** with ellipsoids drawn at the 50% probability level (hydrogen atoms are omitted for clarity). Selected bond lengths (Å) and angles (deg): Pd(1)–C(14) 1.980(5), Pd(1)–P(1) 2.2308(12), Pd(1)–N(1) 2.112(4), Pd(1)–Cl(1) 2.3964(14); C(14)–Pd(1)–P(1) 82.30(15), C(14)–Pd(1)–N(1) 79.73(18), C(14)–Pd(1)–Cl(1) 172.70(15), N(1)–Pd(1)–P(1) 162.01(12), P(1)–Pd(1)–Cl(1) 99.26(5), N(1)–Pd(1)–Cl(1) 98.47(12).

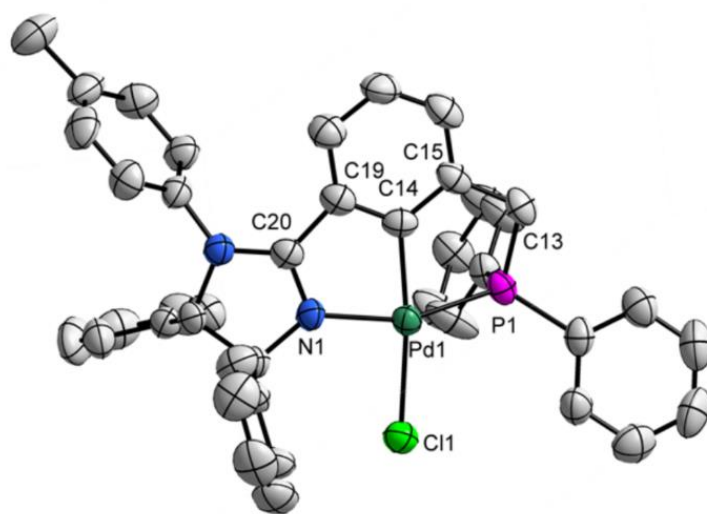

**Figure S2.** Molecular structure of complex **3e** with ellipsoids drawn at the 50% probability level (hydrogen atoms are omitted for clarity; one of the two independent molecules shown). Selected bond lengths (Å) and angles (deg): Pd(1)–C(14) 1.985(8), Pd(1)–P(1) 2.217(2), Pd(1)–N(1) 2.065(6), Pd(1)–Cl(1) 2.391(2); C(14)–Pd(1)–P(1) 81.1(3), C(14)–Pd(1)–N(1) 79.5(3), C(14)–Pd(1)–Cl(1) 173.0(3), N(1)–Pd(1)–P(1) 159.06(19), P(1)–Pd(1)–Cl(1) 104.10(8), N(1)–Pd(1)–Cl(1) 94.7(2).

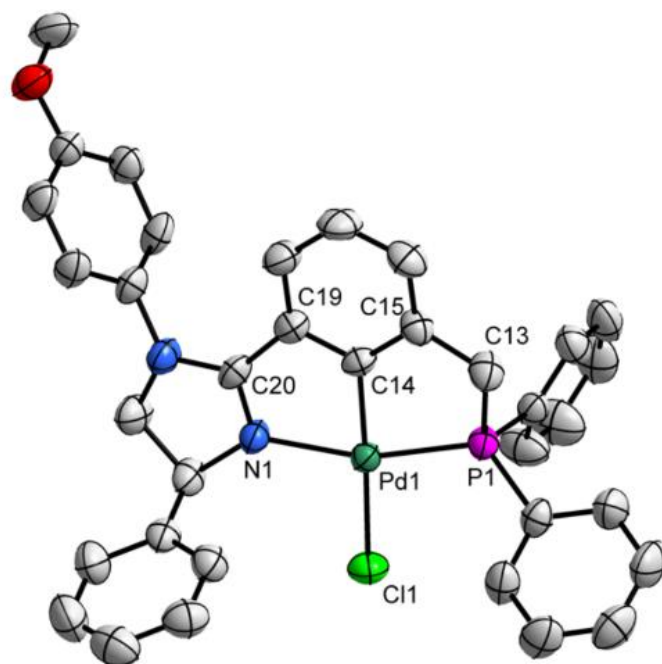

**Figure S3.** Molecular structure of complex **3i** with ellipsoids drawn at the 50% probability level (hydrogen atoms are omitted for clarity). Pd(1)–C(14) 1.9859(19), Pd(1)–P(1) 2.2175(13), Pd(1)–N(1) 2.082(4), Pd(1)–Cl(1) 2.3942(12); C(14)–Pd(1)–P(1) 82.12(9), C(14)–Pd(1)–N(1) 79.59(15), C(14)–Pd(1)–Cl(1) 174.37(9), N(1)–Pd(1)–P(1) 161.59(12), P(1)–Pd(1)–Cl(1) 101.02(5), N(1)–Pd(1)–Cl(1) 97.04(12).

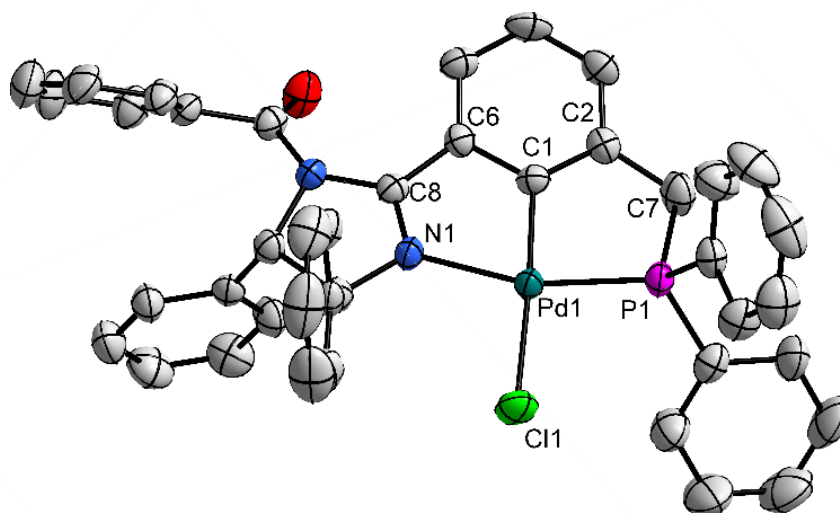

**Figure S4.** Molecular structure of complex **3k** with ellipsoids drawn at the 50% probability level. (hydrogen atoms are omitted for clarity) Selected bond lengths (Å) and angles (deg): Pd(1)–C(1) 1.987(5), Pd(1)–P(1) 2.2159(14), Pd(1)–N(1) 2.082(4), Pd(1)–Cl(1) 2.3701(15); C(1)–Pd(1)–P(1) 83.25(16), C(1)–Pd(1)–N(1) 79.8(2), C(1)–Pd(1)–Cl(1) 176.90(16), N(1)–Pd(1)–P(1) 162.82(13), P(1)–Pd(1)–Cl(1) 99.84(5), N(1)–Pd(1)–Cl(1) 97.09(13).

**Table S1. Summary of crystal structure determination for 3c, 3e, 3i and 3k.**

|                                    | <b>3c</b>                                            | <b>3e</b>                                            | <b>3i</b>                                             | <b>3k</b>                                             |
|------------------------------------|------------------------------------------------------|------------------------------------------------------|-------------------------------------------------------|-------------------------------------------------------|
| formula                            | C <sub>33</sub> H <sub>34</sub> ClN <sub>2</sub> PPd | C <sub>41</sub> H <sub>34</sub> ClN <sub>2</sub> PPd | C <sub>35</sub> H <sub>30</sub> ClN <sub>2</sub> OPPd | C <sub>41</sub> H <sub>32</sub> ClN <sub>2</sub> OPPd |
| Mr                                 | 631.44                                               | 727.52                                               | 667.43                                                | 741.50                                                |
| Temp[K]                            | 291.15                                               | 293(2)                                               | 293(2)                                                | 293(2)                                                |
| wavelength [Å]                     | 0.71073                                              | 1.54184                                              | 1.54184                                               | 1.54184                                               |
| Cryst system                       | monoclinic                                           | monoclinic                                           | orthorhombic                                          | orthorhombic                                          |
| Space group                        | P2 <sub>1</sub>                                      | P2 <sub>1</sub>                                      | P2 <sub>1</sub> 2 <sub>1</sub> 2 <sub>1</sub>         | P2 <sub>1</sub> 2 <sub>1</sub> 2 <sub>1</sub>         |
| a/Å                                | 10.2862(5)                                           | 12.41683(19)                                         | 9.20754(8)                                            | 9.34262(12)                                           |
| b/Å                                | 12.1285(4)                                           | 23.3274(3)                                           | 14.47998(12)                                          | 14.76131(19)                                          |
| c/Å                                | 12.6954(5)                                           | 12.73072(19)                                         | 22.6523(2)                                            | 24.6818(3)                                            |
| α/°                                | 90                                                   | 90                                                   | 90                                                    | 90                                                    |
| β/°                                | 111.540(5)                                           | 113.1047(17)                                         | 90                                                    | 90                                                    |
| γ/°                                | 90                                                   | 90                                                   | 90                                                    | 90                                                    |
| V [Å <sup>3</sup> ]                | 1473.22(11)                                          | 3391.70(9)                                           | 3020.12(5)                                            | 3403.85(8)                                            |
| Z                                  | 2                                                    | 4                                                    | 4                                                     | 4                                                     |
| ρ <sub>calc</sub> /cm <sup>3</sup> | 1.423                                                | 1.425                                                | 1.468                                                 | 1.447                                                 |
| μ/mm <sup>-1</sup>                 | 0.799                                                | 5.823                                                | 6.508                                                 | 5.838                                                 |
| F(000)                             | 648.0                                                | 1488.0                                               | 1360.0                                                | 1512.0                                                |
| Crystal size/mm <sup>3</sup>       | 0.22 × 0.2 ×<br>0.18                                 | 0.13 × 0.1 ×<br>0.08                                 | 0.13 × 0.1 × 0.09                                     | 0.23 × 0.171 ×<br>0.119                               |
| θ range [deg]                      | 6.39 to 52.728                                       | 7.55 to 141.9                                        | 7.246 to 134.144                                      | 7.164 to 134.15                                       |
| Index ranges                       | -12 ≤ h ≤ 12<br>-15 ≤ k ≤ 13<br>-15 ≤ l ≤ 12         | -15 ≤ h ≤ 14<br>-27 ≤ k ≤ 28<br>-15 ≤ l ≤ 15         | 11 ≤ h ≤ 9<br>-17 ≤ k ≤ 17<br>27 ≤ l ≤ 26             | -10 ≤ h ≤ 11<br>-11 ≤ k ≤ 17<br>-29 ≤ l ≤ 25          |
| no. of data collected              | 6698                                                 | 32816                                                | 22452                                                 | 13142                                                 |
| no. of unique data                 | 5022                                                 | 12231                                                | 5374                                                  | 6055                                                  |
| Final R indexes                    | R <sub>1</sub> = 0.0324                              | R <sub>1</sub> = 0.0452                              | R <sub>1</sub> = 0.0279                               | R <sub>1</sub> = 0.0320                               |
| [I ≥ 2σ (I)]                       | wR <sub>2</sub> = 0.0575                             | wR <sub>2</sub> = 0.1138                             | wR <sub>2</sub> = 0.0694                              | wR <sub>2</sub> = 0.0684                              |
| Final R indexes [all data]         | R <sub>1</sub> = 0.0380<br>wR <sub>2</sub> = 0.0615  | R <sub>1</sub> = 0.0491<br>wR <sub>2</sub> = 0.1183  | R <sub>1</sub> = 0.0302<br>wR <sub>2</sub> = 0.0712   | R <sub>1</sub> = 0.0382<br>wR <sub>2</sub> = 0.0723   |
| peak/hole [e Å <sup>-3</sup> ]     | 0.55/-0.29                                           | 0.86/-0.58                                           | 0.33/-0.35                                            | 0.30/-0.41                                            |
| Flack parameter                    | -0.03(2)                                             | -0.034(7)                                            | -0.030(5)                                             | -0.024(6)                                             |
| CCDC number                        | 2154126                                              | 2154135                                              | 2154138                                               | 2154139                                               |

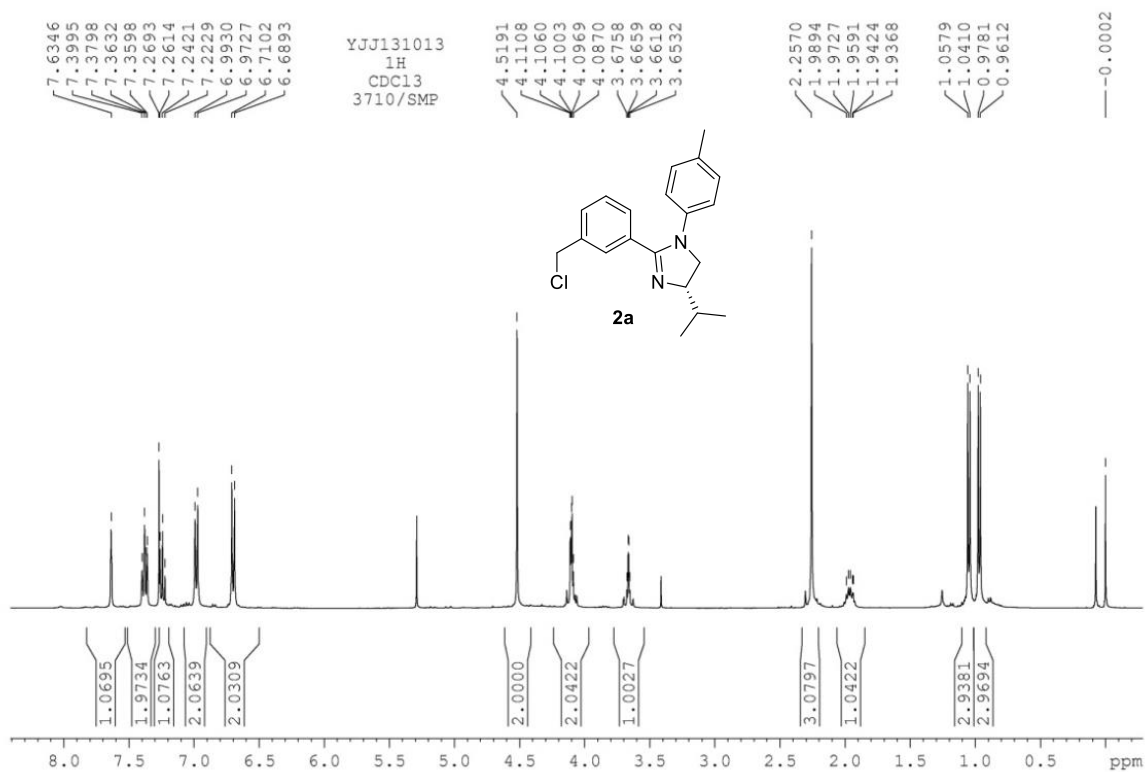

$^1\text{H}$  NMR spectrum of **2a** (400 MHz,  $\text{CDCl}_3$ )

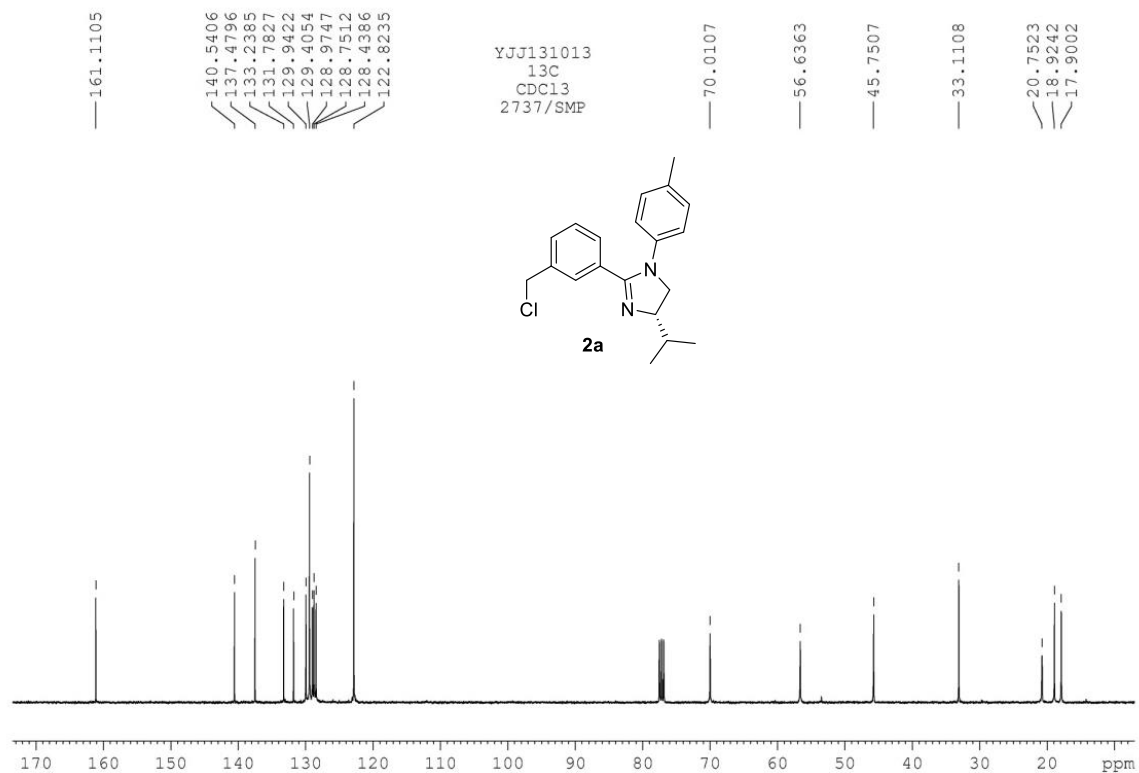

$^{13}\text{C}\{^1\text{H}\}$  NMR spectrum of **2a** (100 MHz,  $\text{CDCl}_3$ )

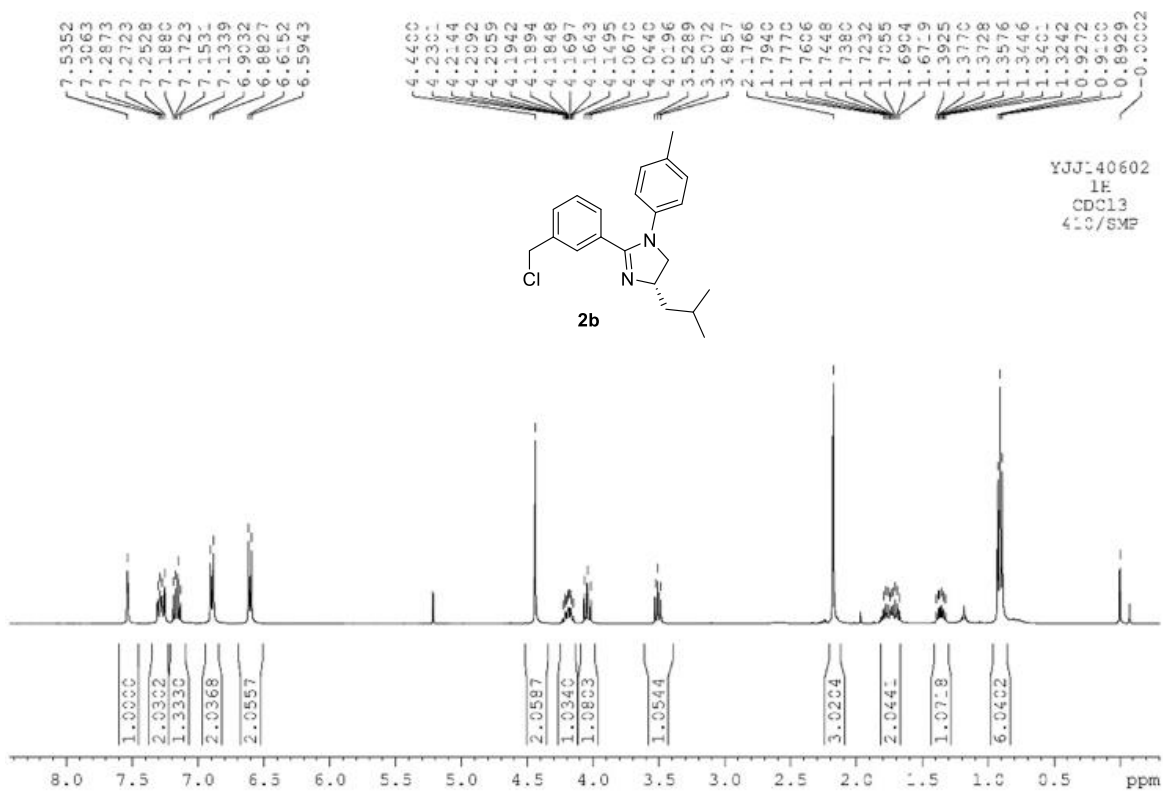

<sup>1</sup>H NMR spectrum of **2b** (400 MHz, CDCl<sub>3</sub>)

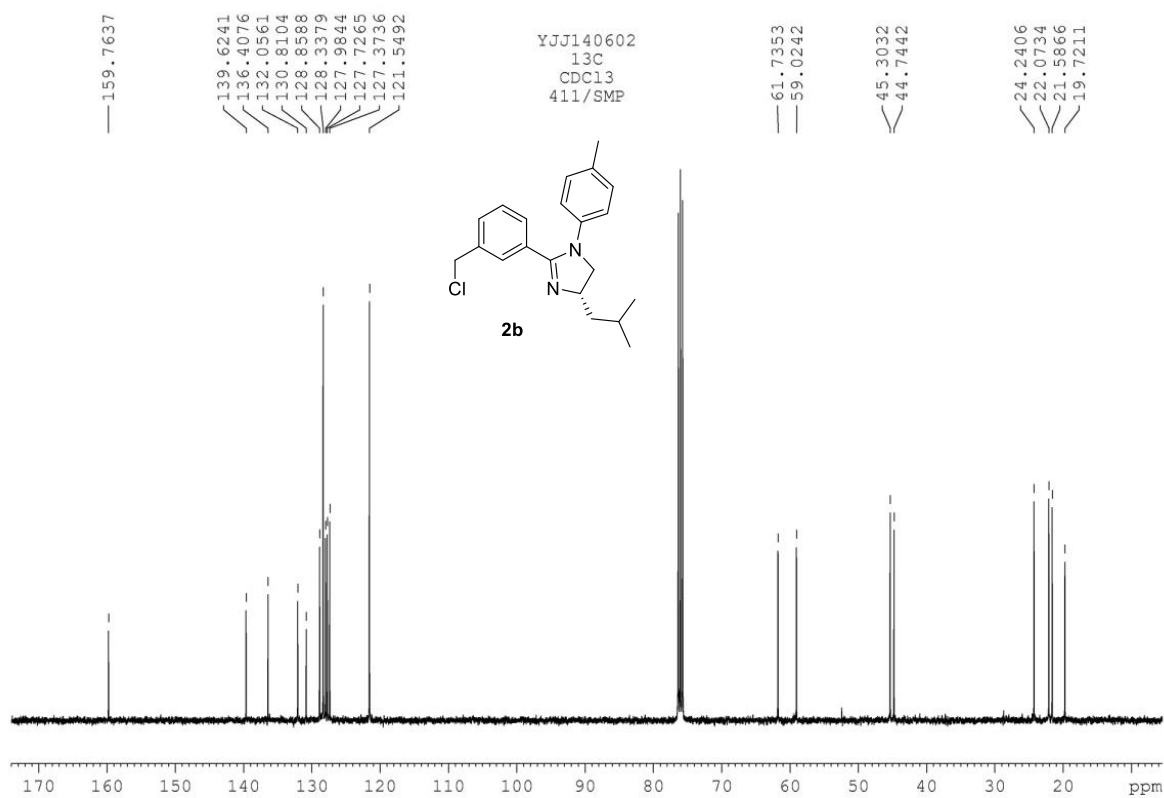

<sup>13</sup>C{<sup>1</sup>H} NMR spectrum of **2b** (100 MHz, CDCl<sub>3</sub>)

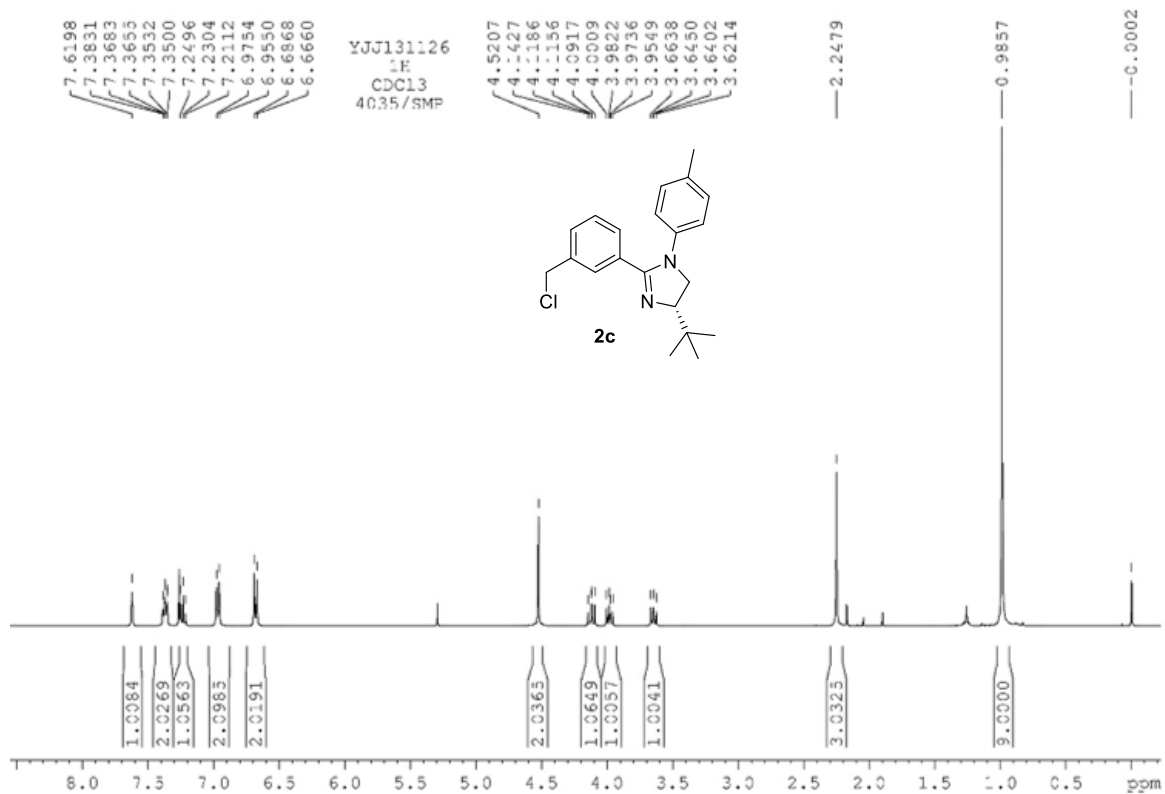

$^1\text{H}$  NMR spectrum of **2c** (400 MHz,  $\text{CDCl}_3$ )

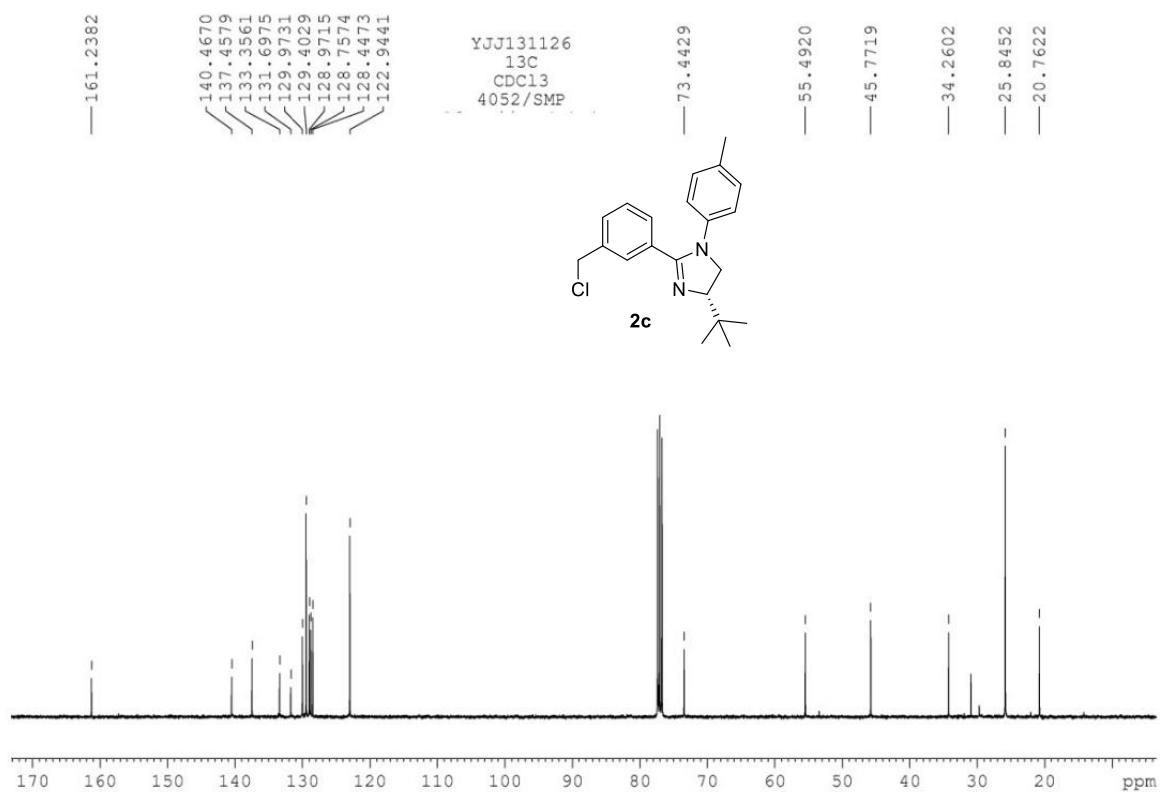

$^{13}\text{C}\{^1\text{H}\}$  NMR spectrum of **2c** (100 MHz,  $\text{CDCl}_3$ )

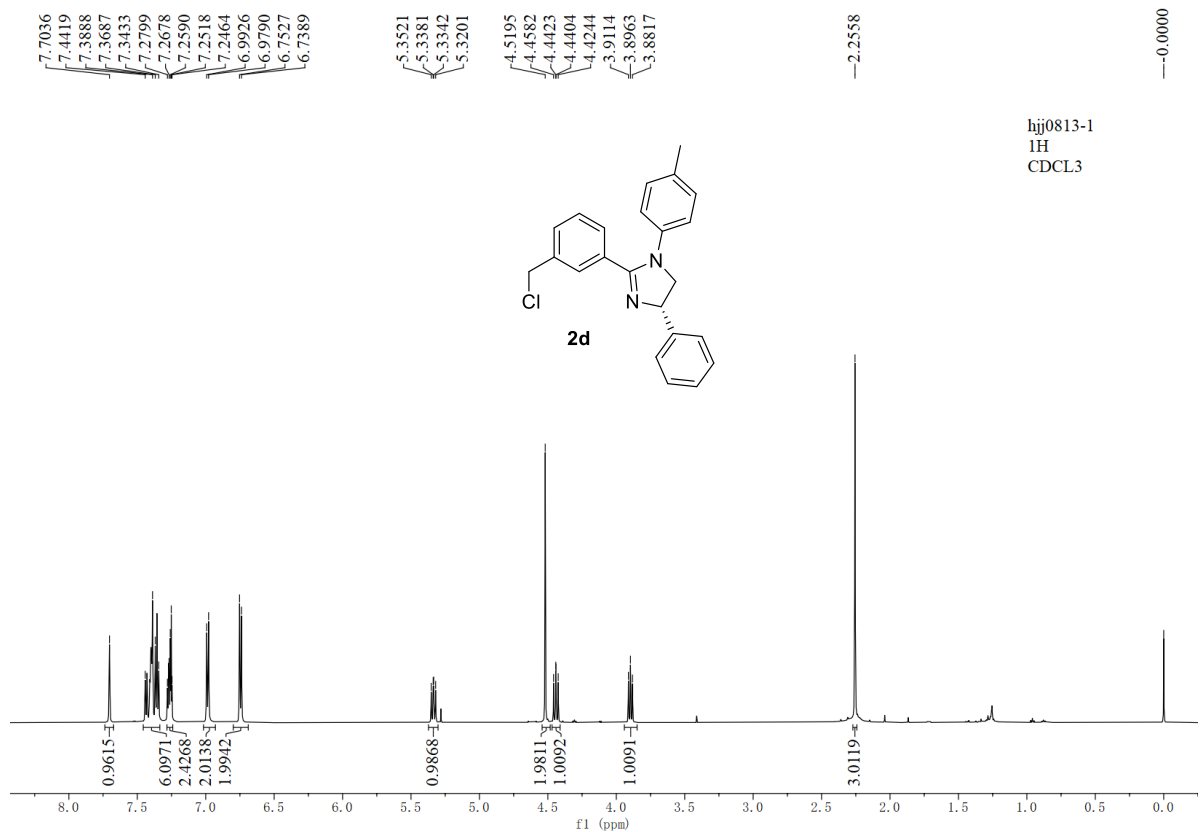

<sup>1</sup>H NMR spectrum of **2d** (600 MHz, CDCl<sub>3</sub>)

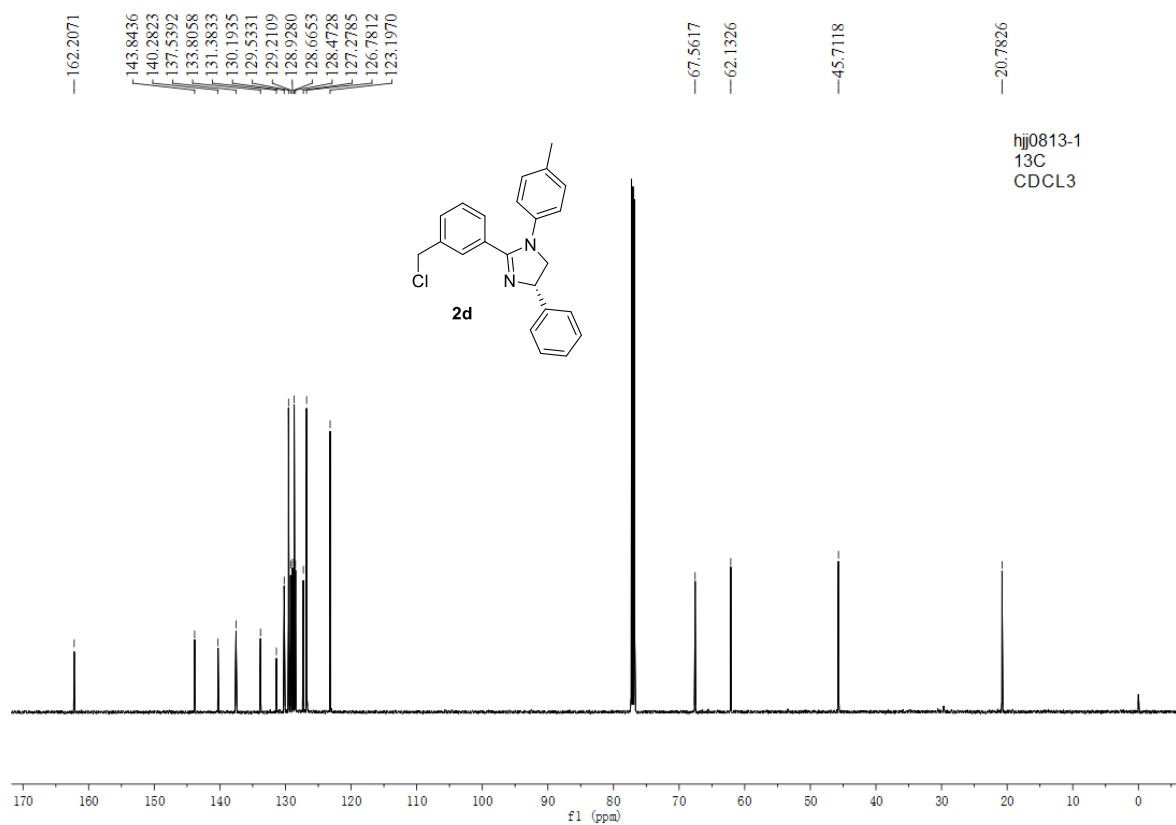

<sup>13</sup>C{<sup>1</sup>H} NMR spectrum of **2d** (150 MHz, CDCl<sub>3</sub>)



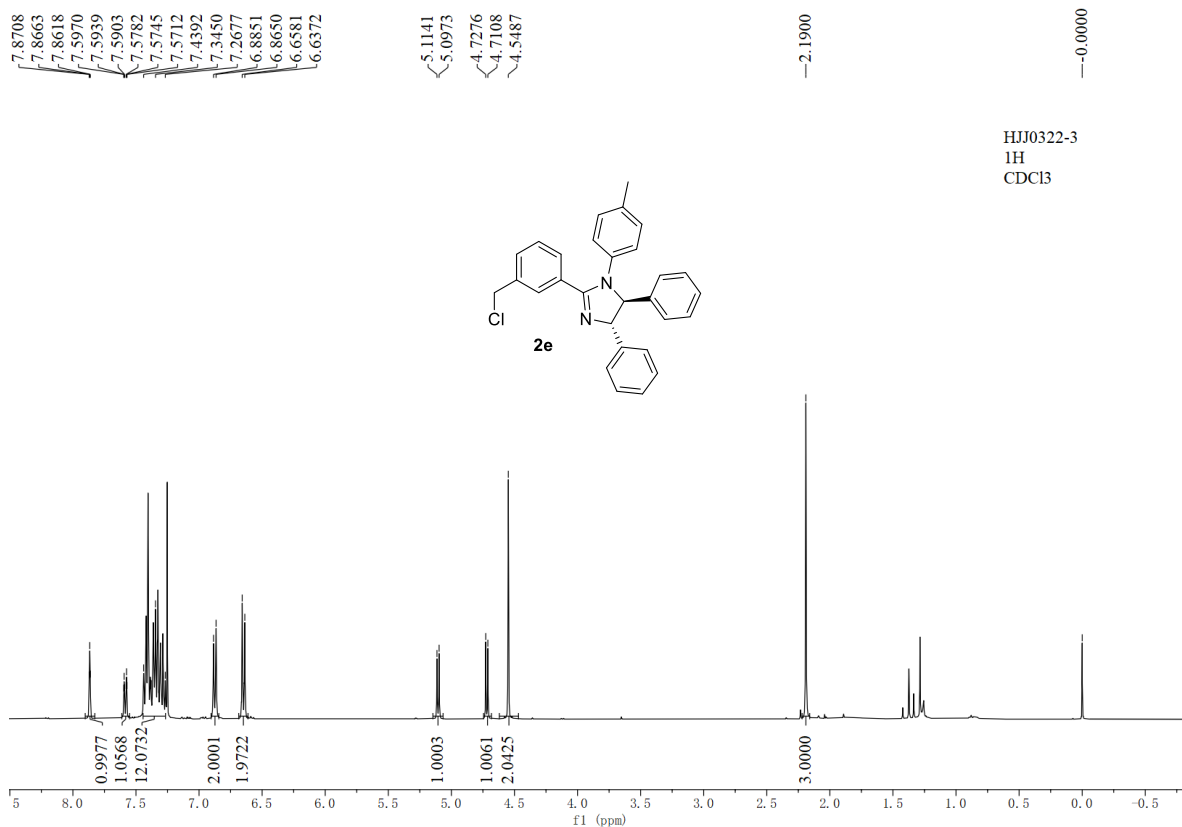

<sup>1</sup>H NMR spectrum of **2e** (400 MHz, CDCl<sub>3</sub>)

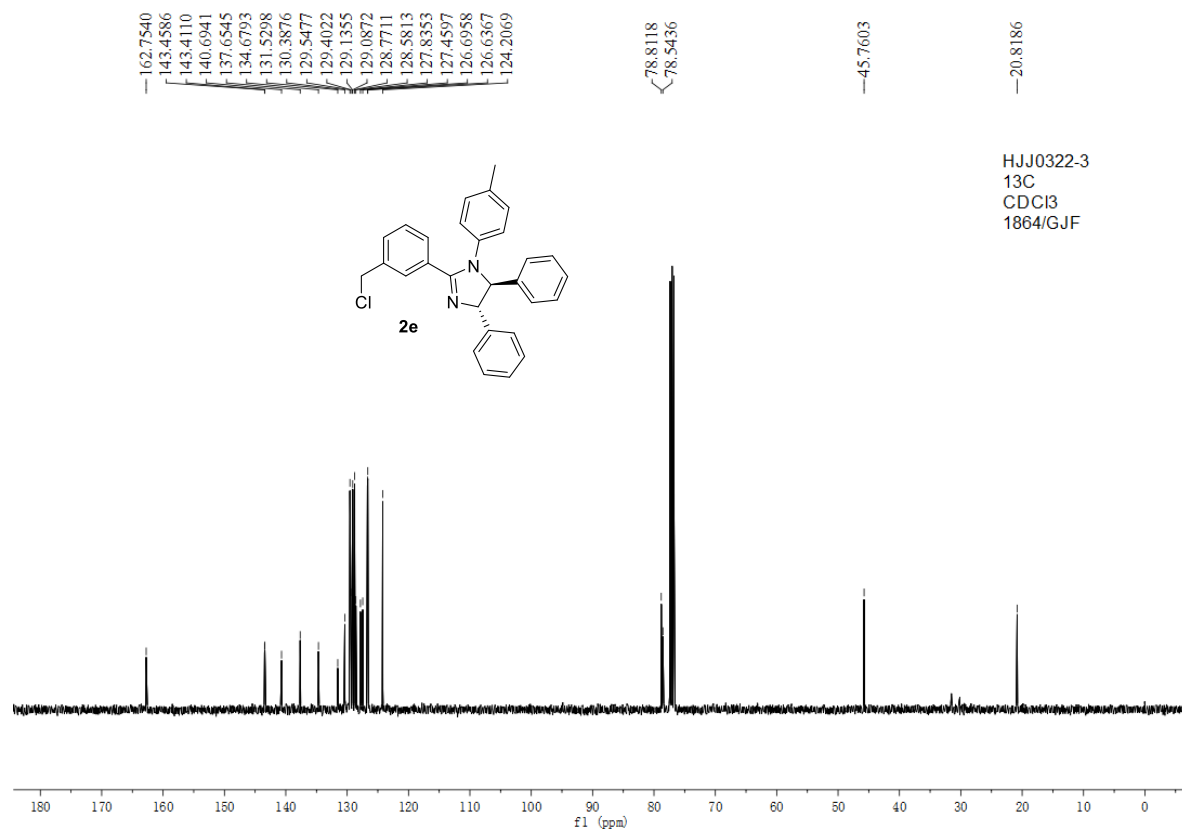

<sup>13</sup>C {<sup>1</sup>H} NMR spectrum of **2e** (100 MHz, CDCl<sub>3</sub>)

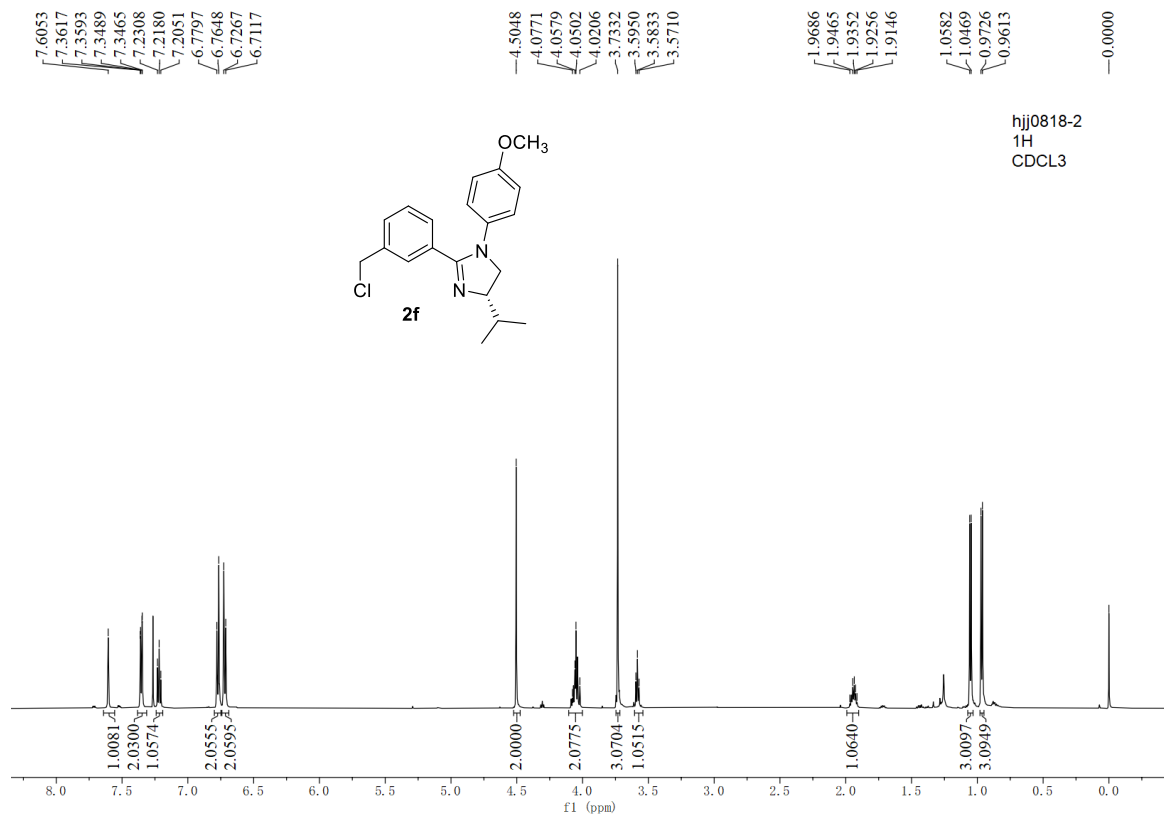

<sup>1</sup>H NMR spectrum of **2f** (600 MHz, CDCl<sub>3</sub>)

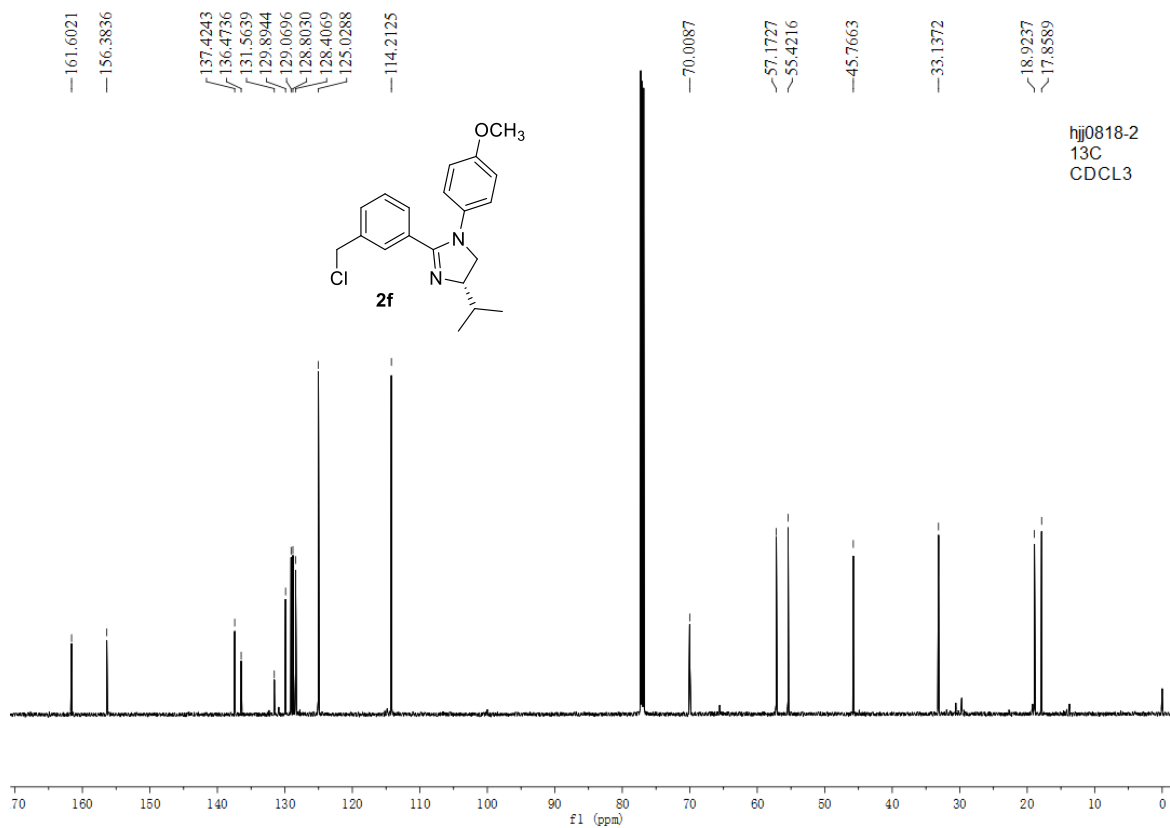

<sup>13</sup>C {<sup>1</sup>H} NMR spectrum of **2f** (150 MHz, CDCl<sub>3</sub>)

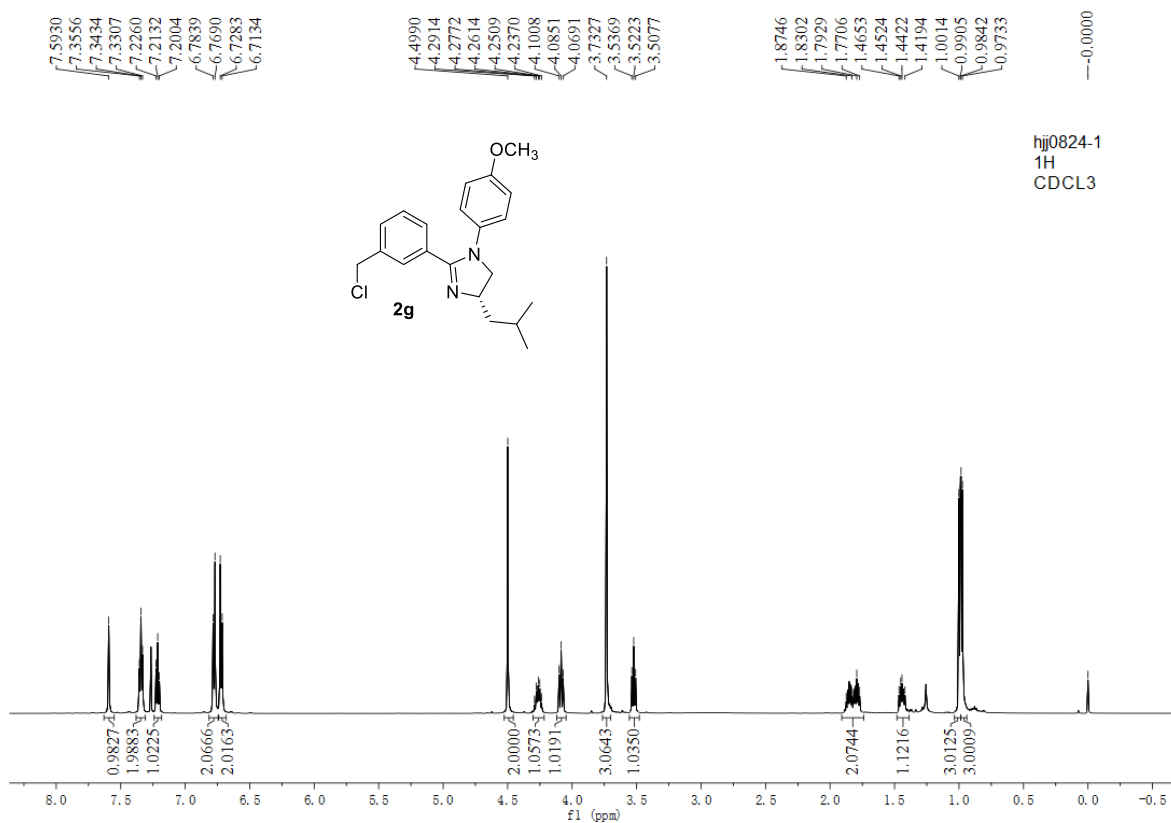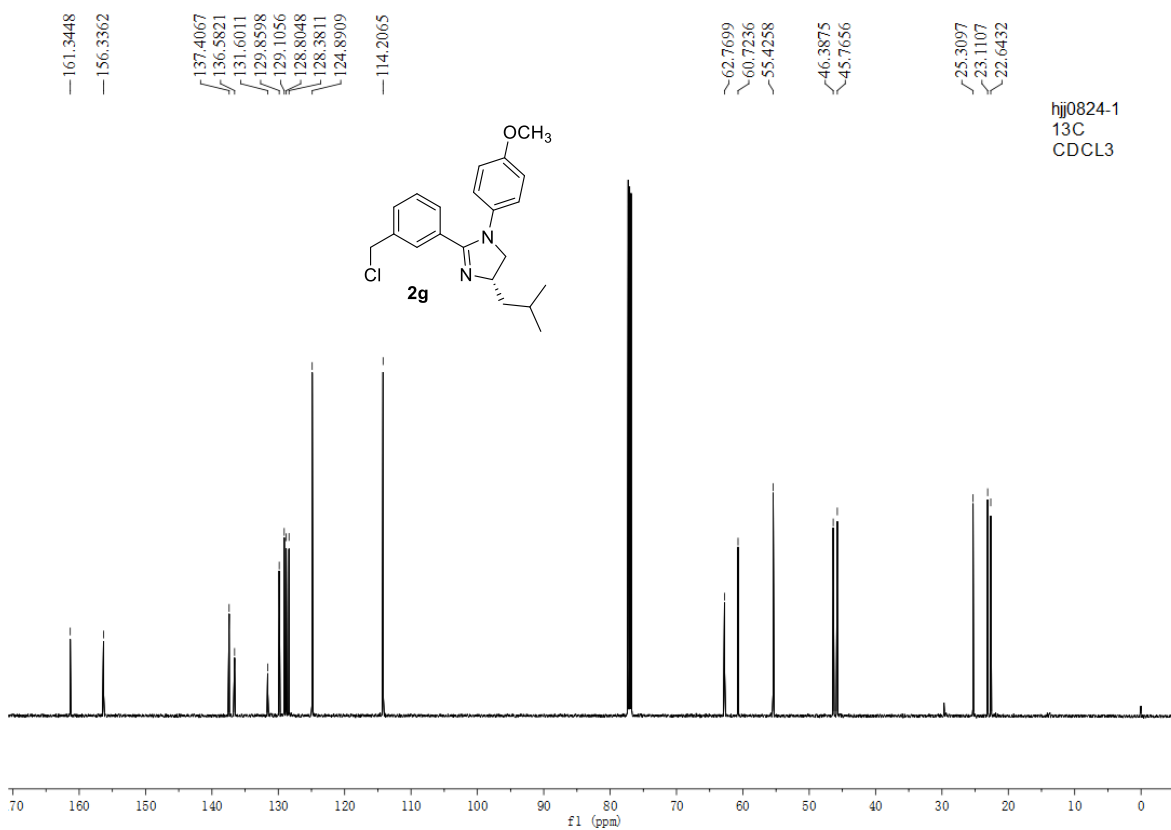

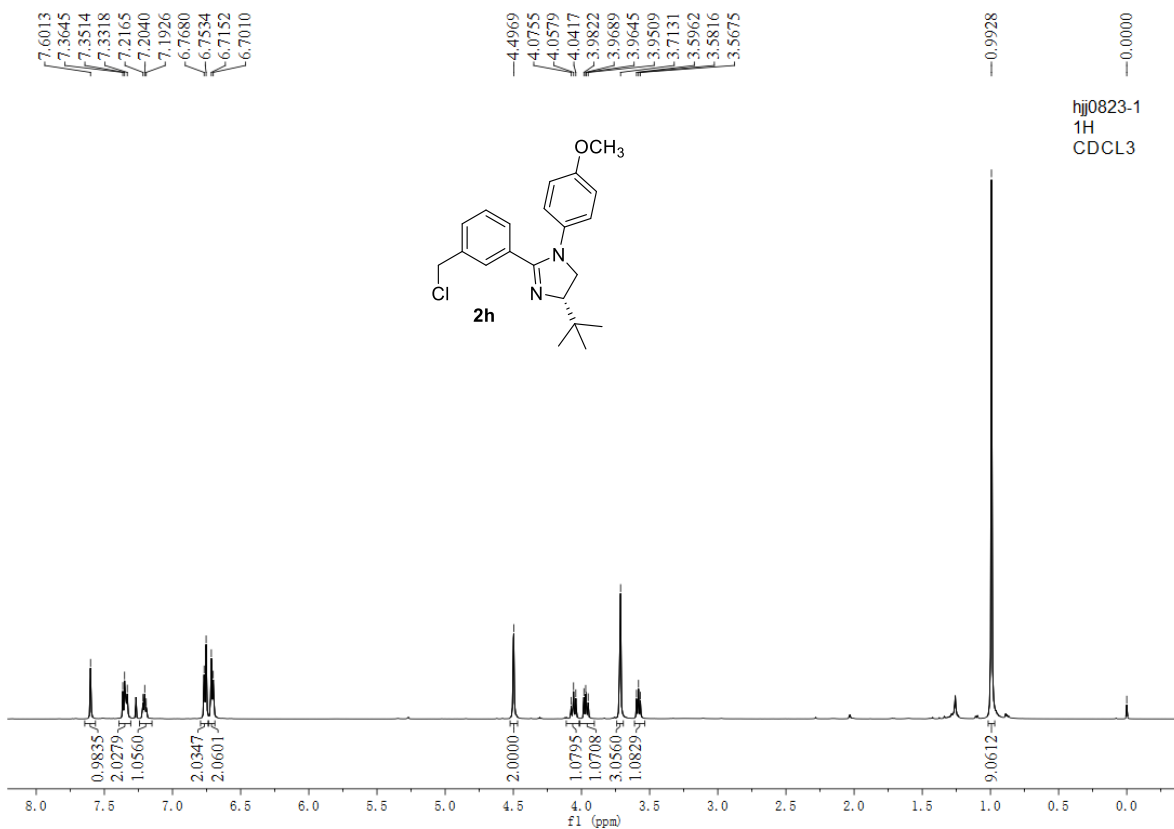

<sup>1</sup>H NMR spectrum of **2h** (600 MHz, CDCl<sub>3</sub>)

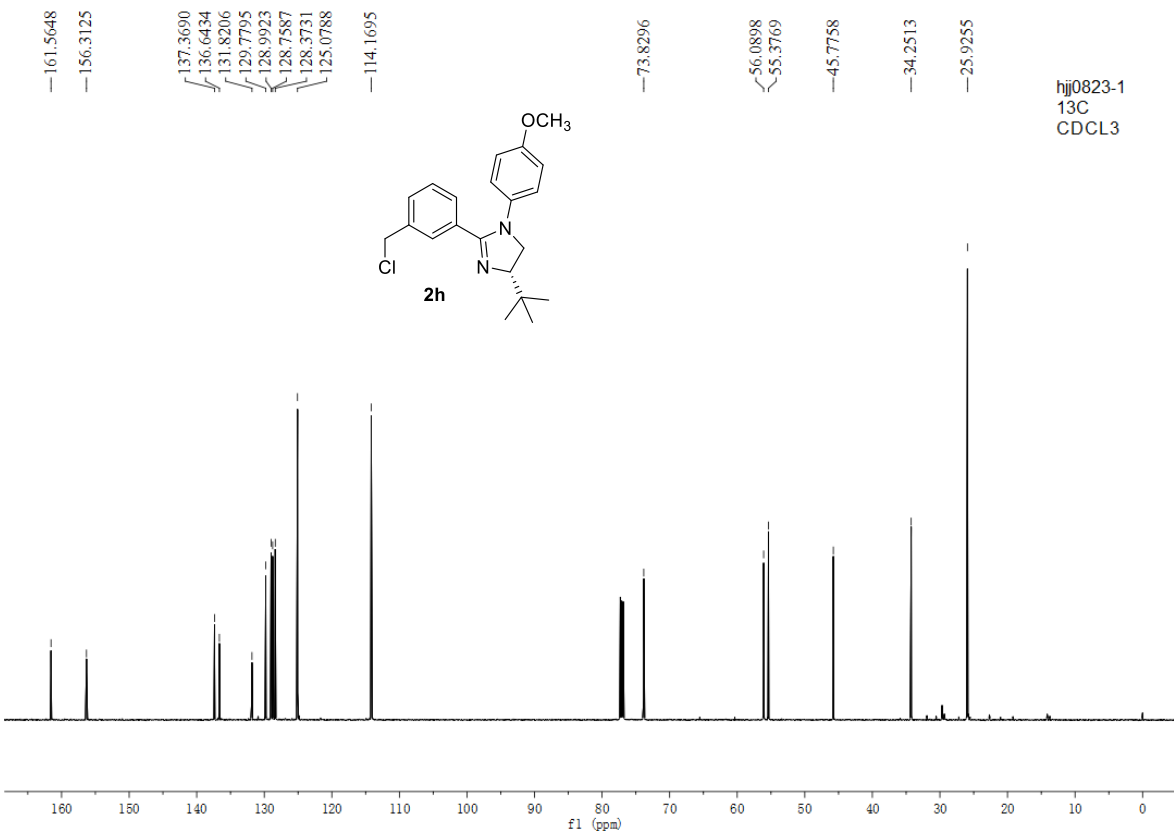

<sup>13</sup>C{<sup>1</sup>H} NMR spectrum of **2h** (150 MHz, CDCl<sub>3</sub>)

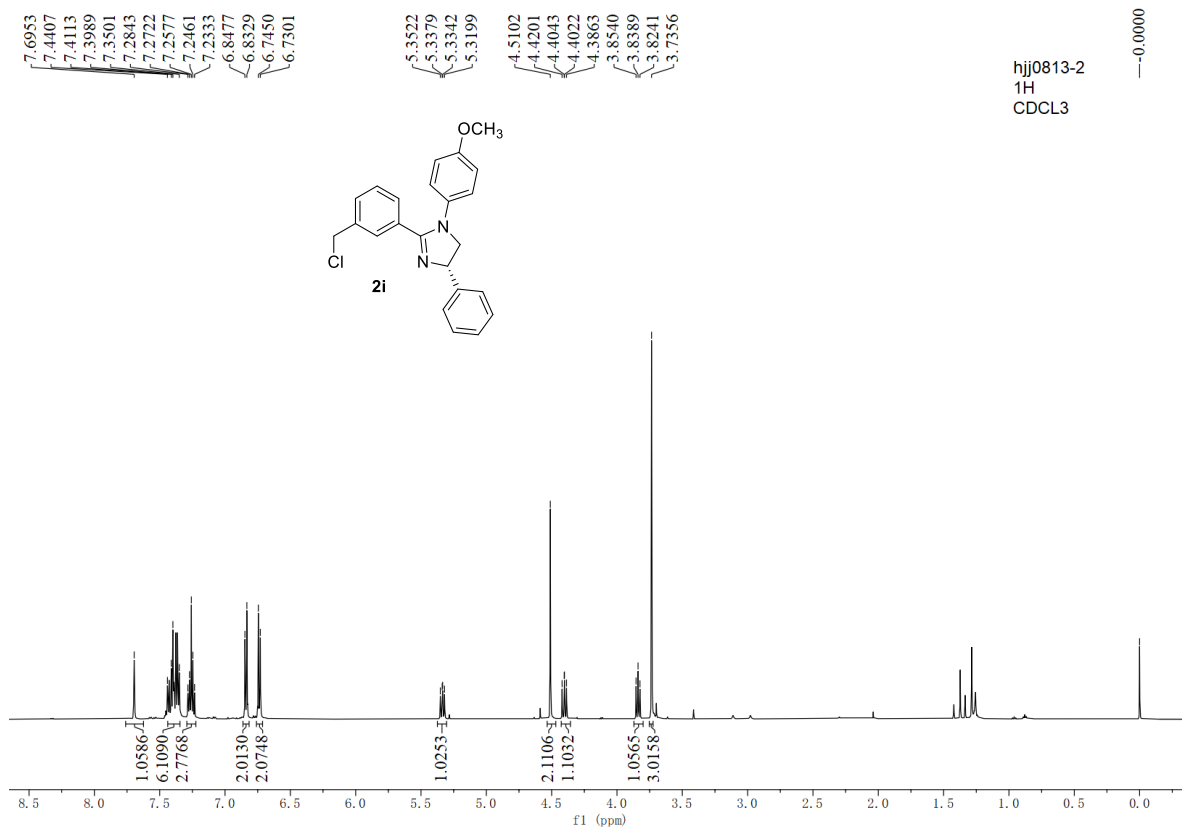

$^1\text{H}$  NMR spectrum of **2i** (600 MHz,  $\text{CDCl}_3$ )

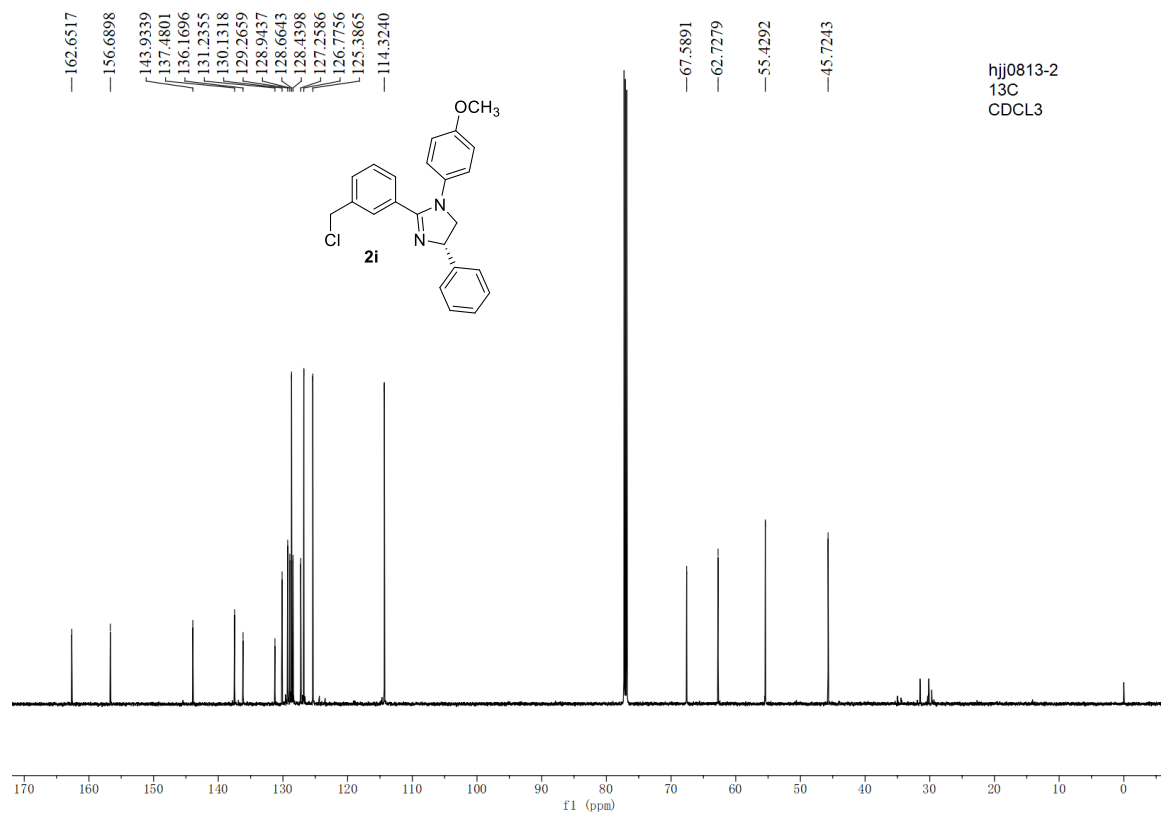

$^{13}\text{C}\{^1\text{H}\}$  NMR spectrum of **2i** (150 MHz,  $\text{CDCl}_3$ )

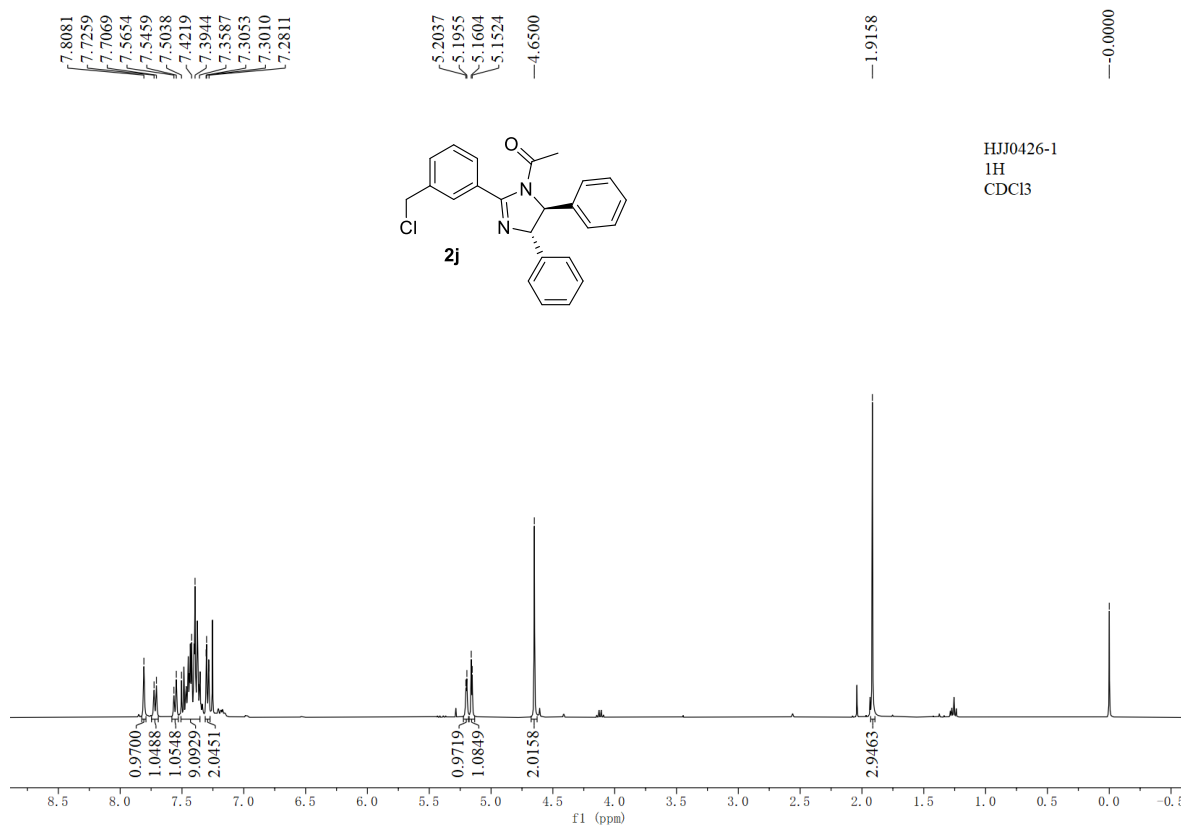

<sup>1</sup>H NMR spectrum of **2j** (400 MHz, CDCl<sub>3</sub>)

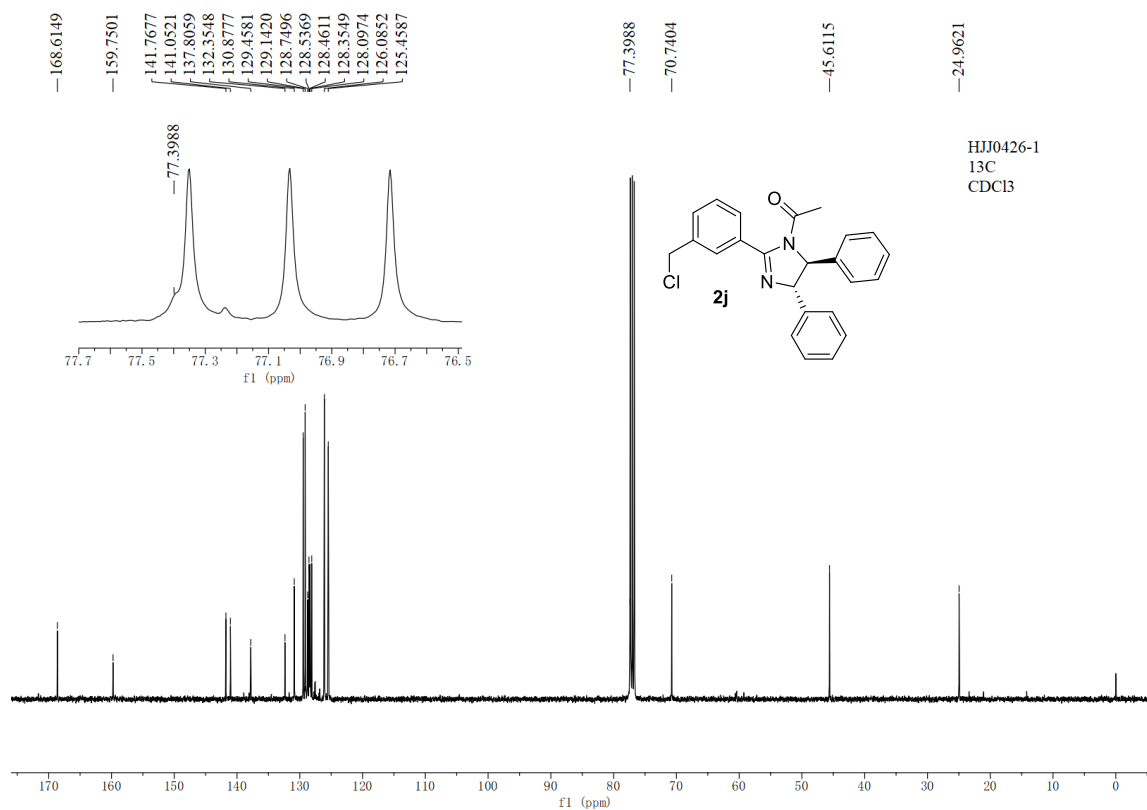

<sup>13</sup>C {<sup>1</sup>H} NMR spectrum of **2j** (100 MHz, CDCl<sub>3</sub>)

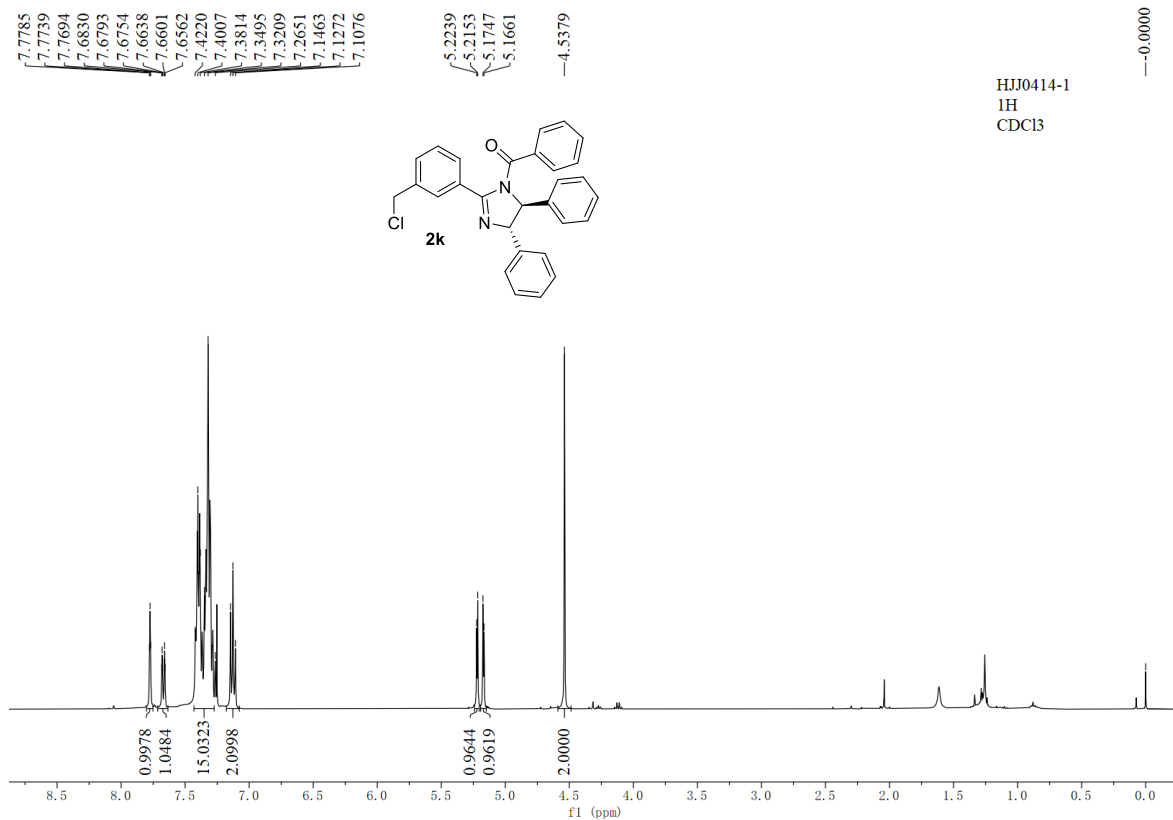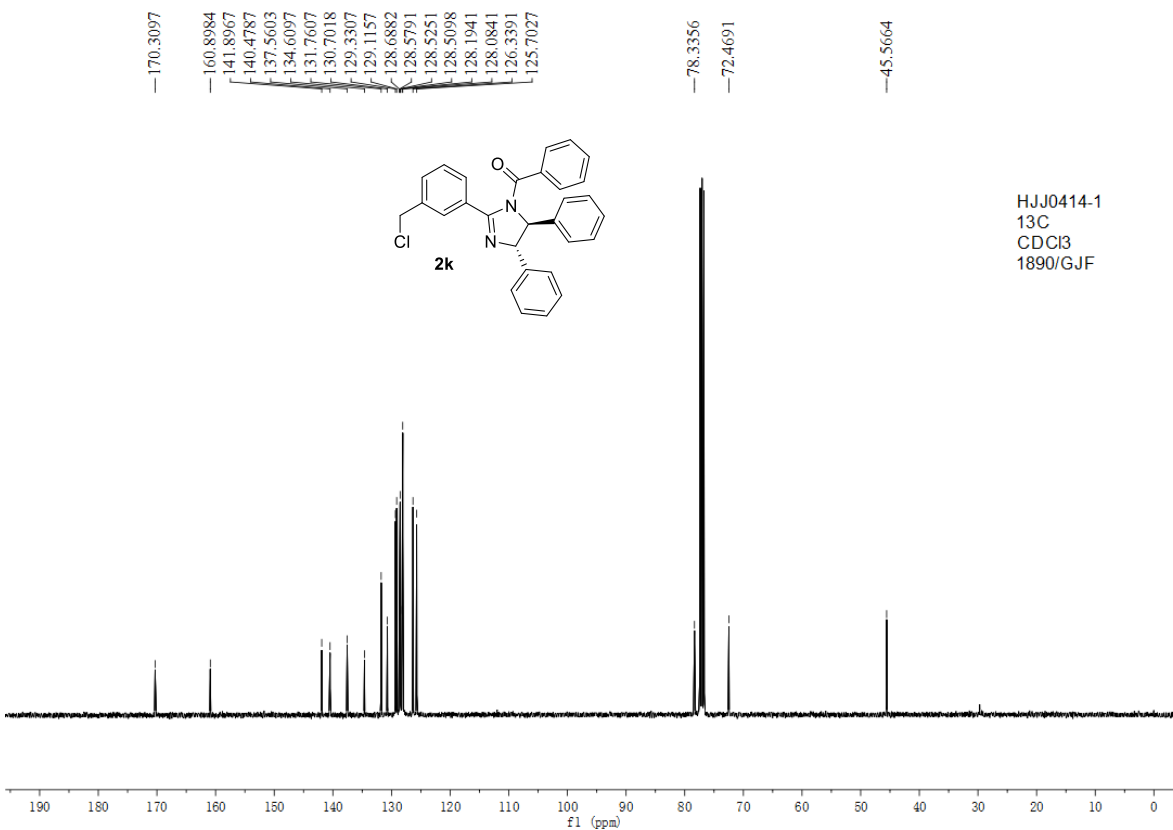

<sup>13</sup>C {<sup>1</sup>H} NMR spectrum of **2k** (100 MHz, CDCl<sub>3</sub>)

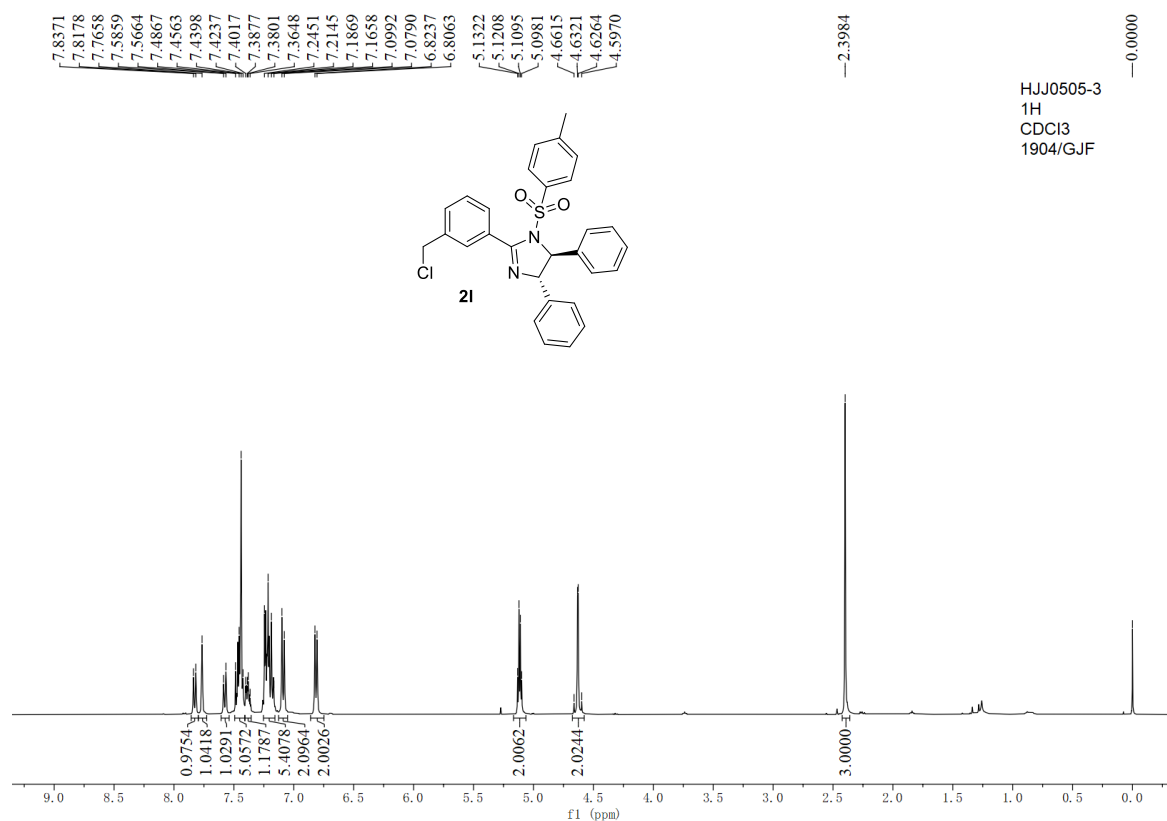

$^1\text{H}$  NMR spectrum of **2I** (400 MHz,  $\text{CDCl}_3$ )

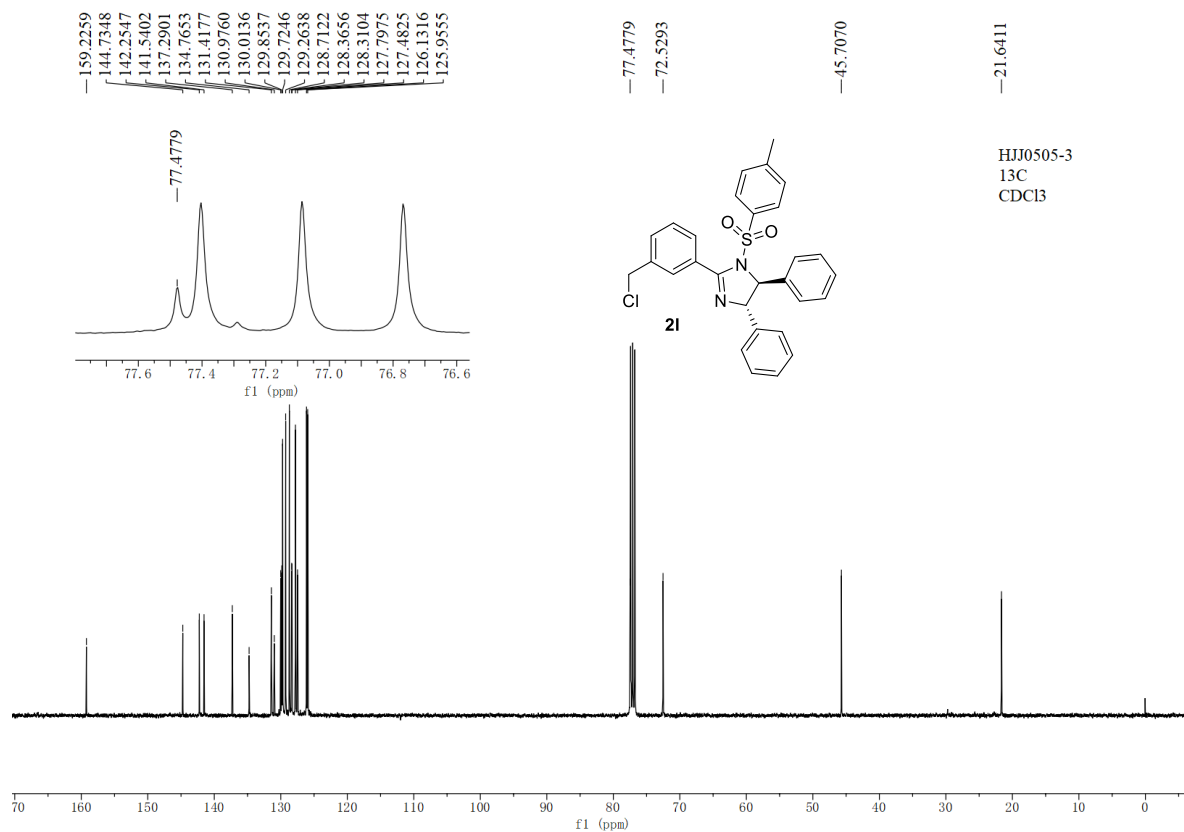

$^{13}\text{C}\{^1\text{H}\}$  NMR spectrum of **2I** (100 MHz,  $\text{CDCl}_3$ )



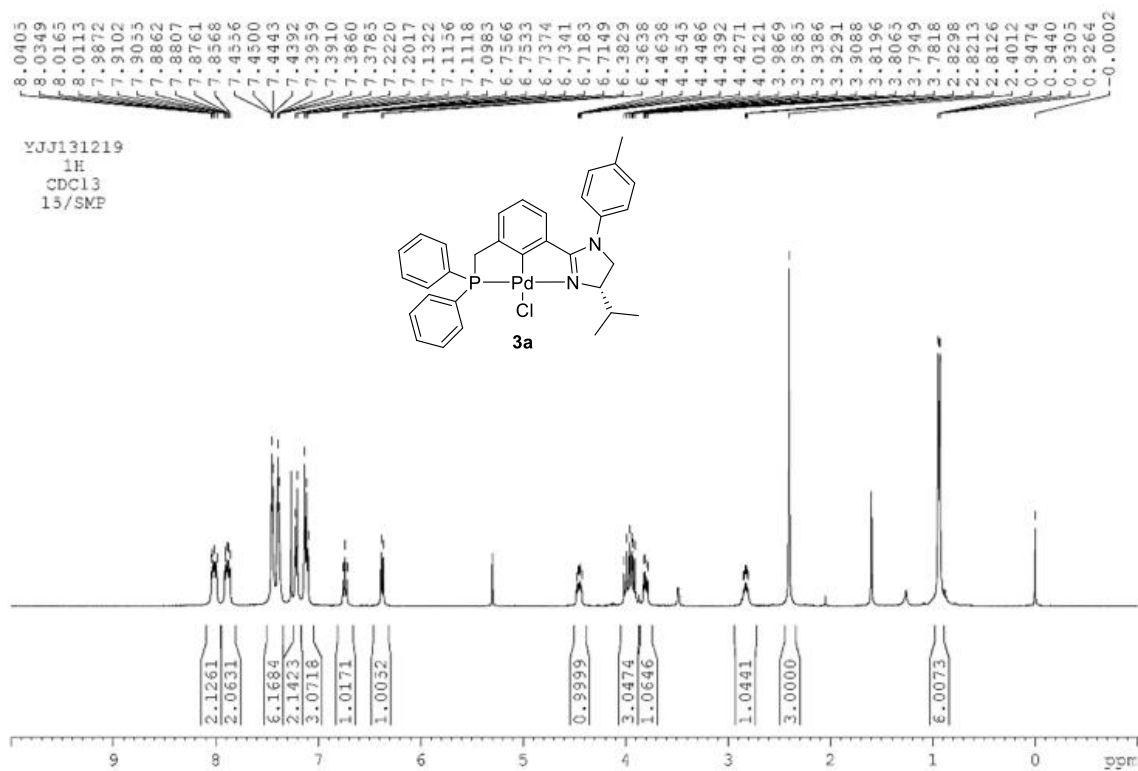

<sup>1</sup>H NMR spectrum of **3a** (400 MHz, CDCl<sub>3</sub>)

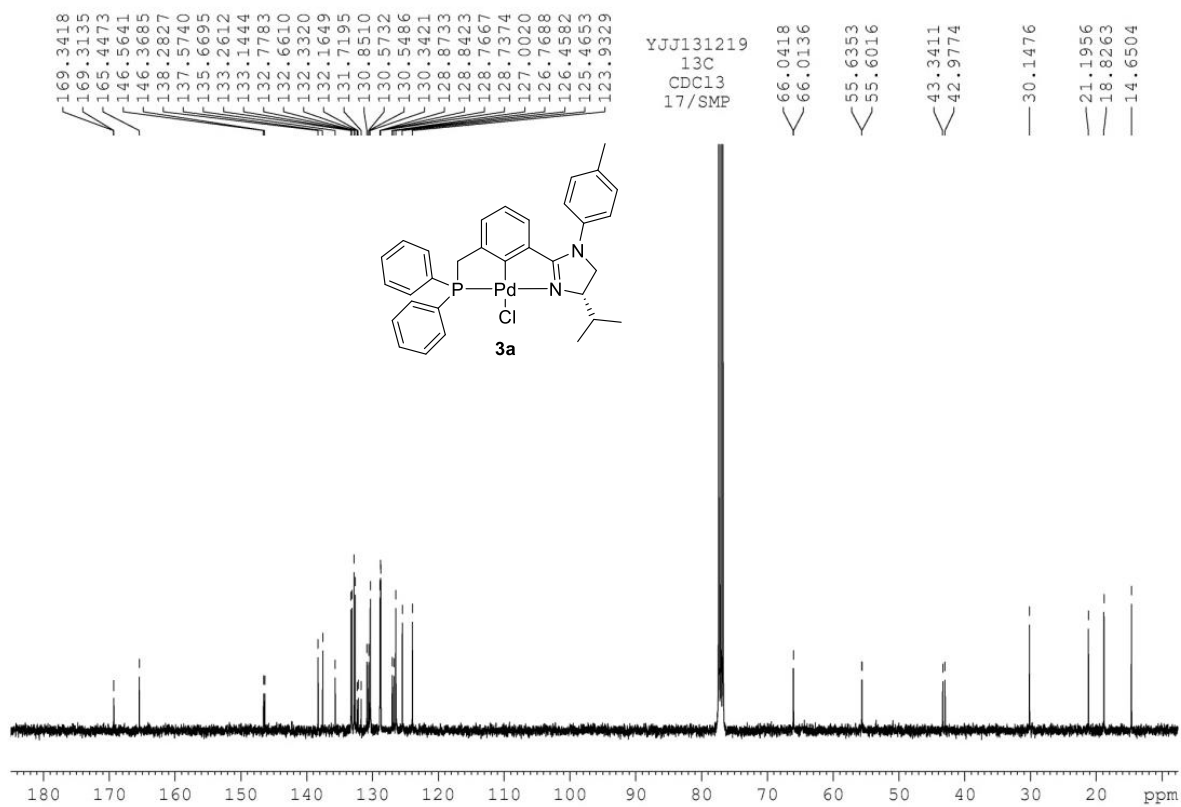

<sup>13</sup>C {<sup>1</sup>H} NMR spectrum of **3a** (100 MHz, CDCl<sub>3</sub>)

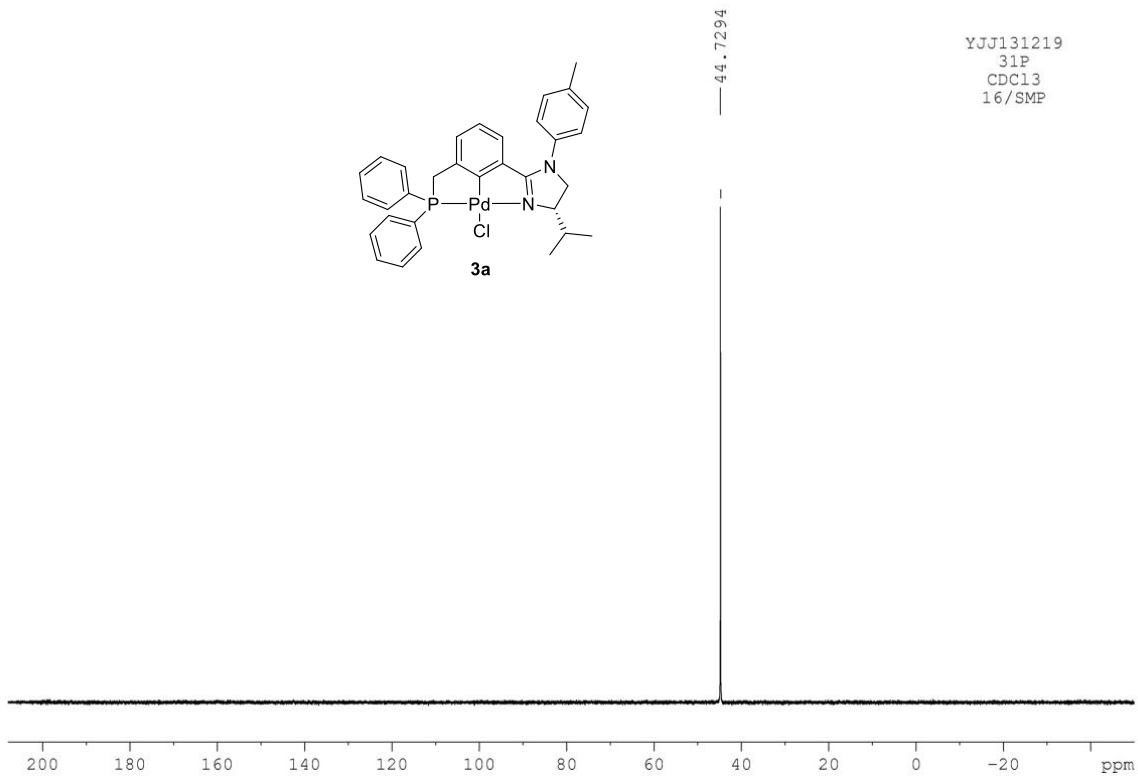

$^{31}\text{P}\{^1\text{H}\}$  NMR spectrum of **3a** (162 MHz,  $\text{CDCl}_3$ )

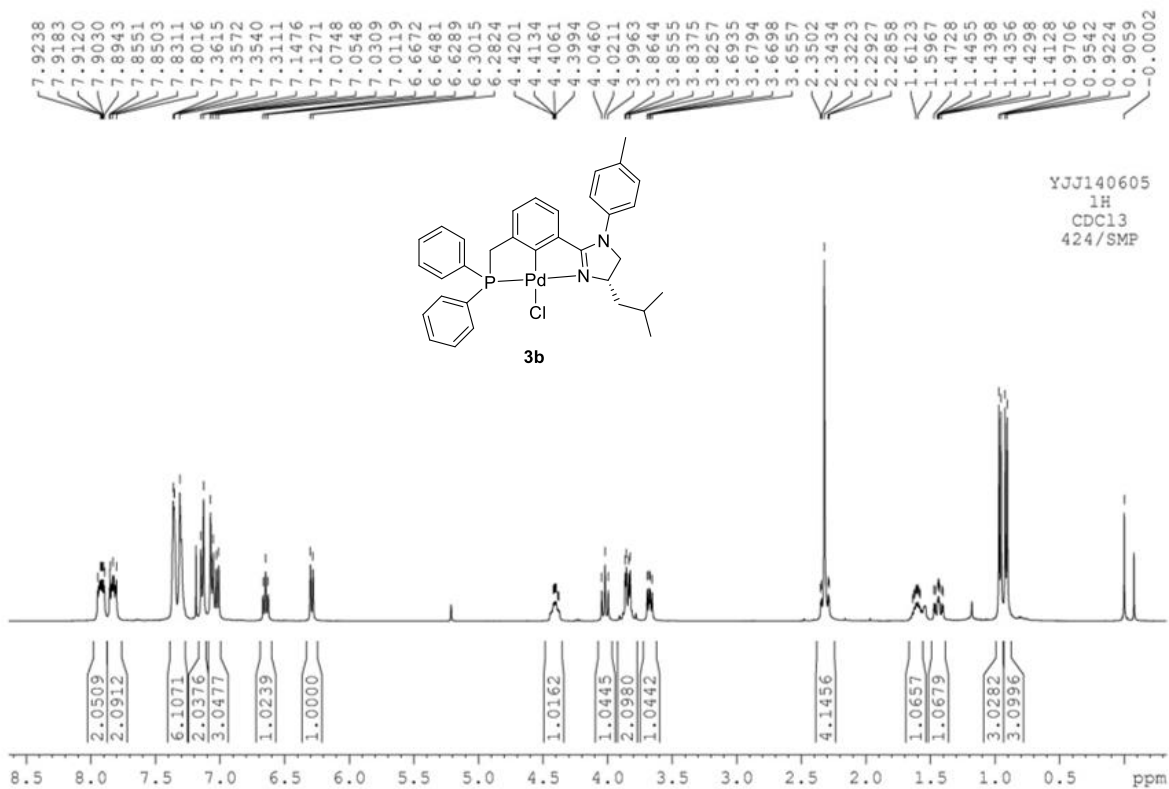

$^1\text{H}$  NMR spectrum of **3b** (400 MHz,  $\text{CDCl}_3$ )

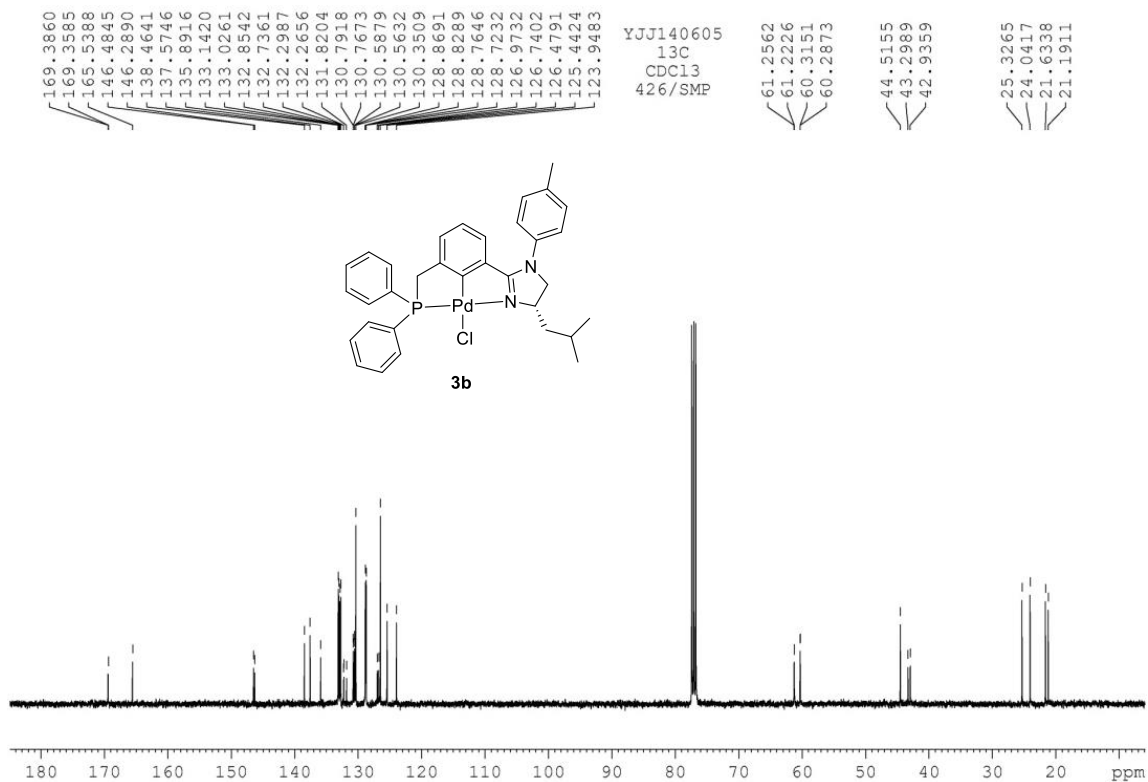

$^{13}\text{C}\{^1\text{H}\}$  NMR spectrum of **3b** (100 MHz,  $\text{CDCl}_3$ )

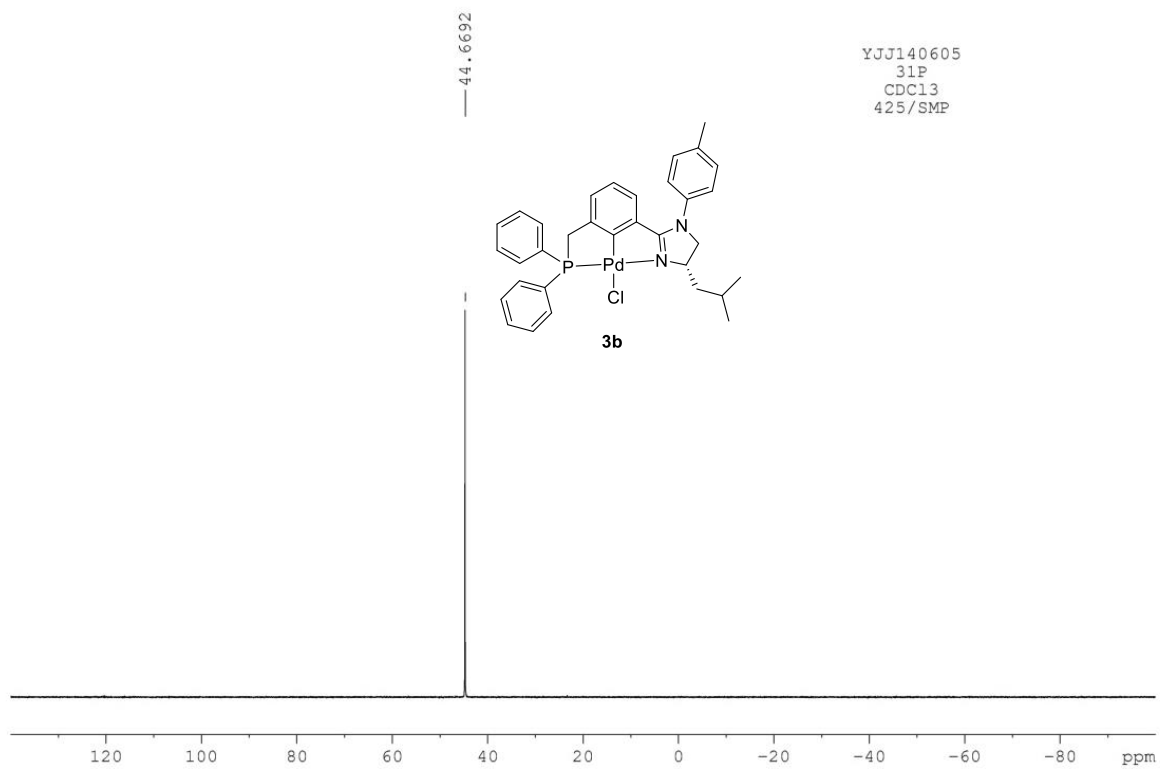

$^{31}\text{P}\{^1\text{H}\}$  NMR spectrum of **3b** (162 MHz,  $\text{CDCl}_3$ )

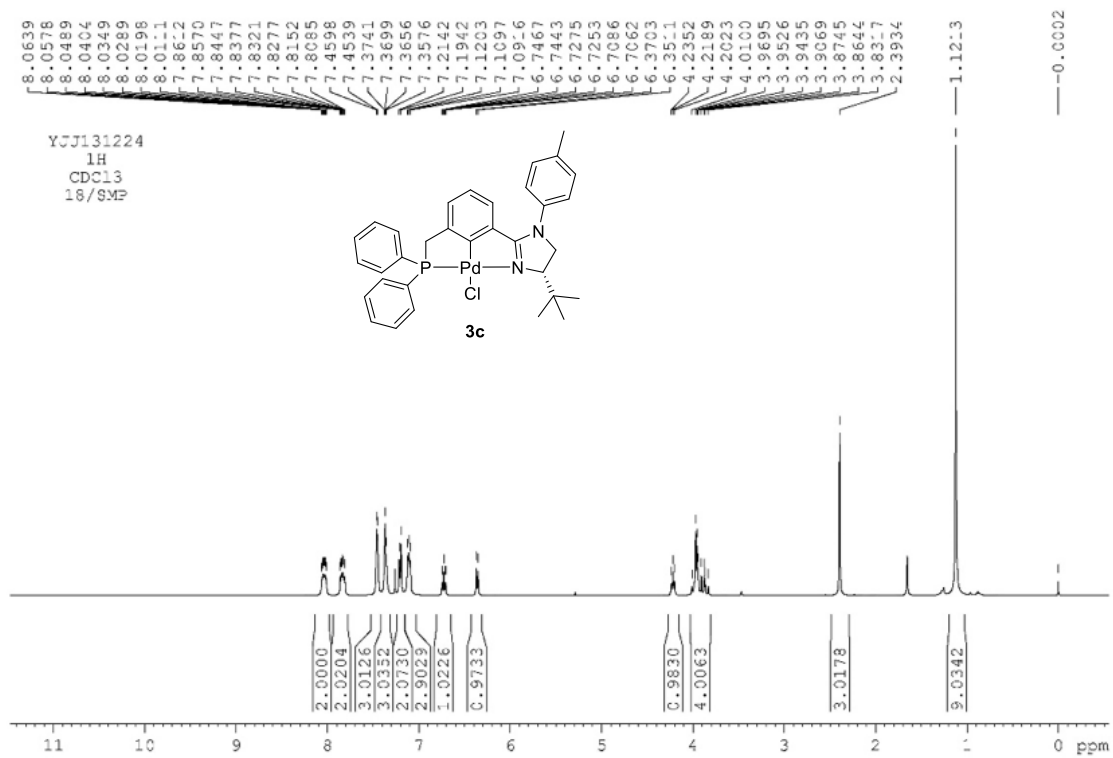

$^1\text{H}$  NMR spectrum of **3c** (400 MHz,  $\text{CDCl}_3$ )

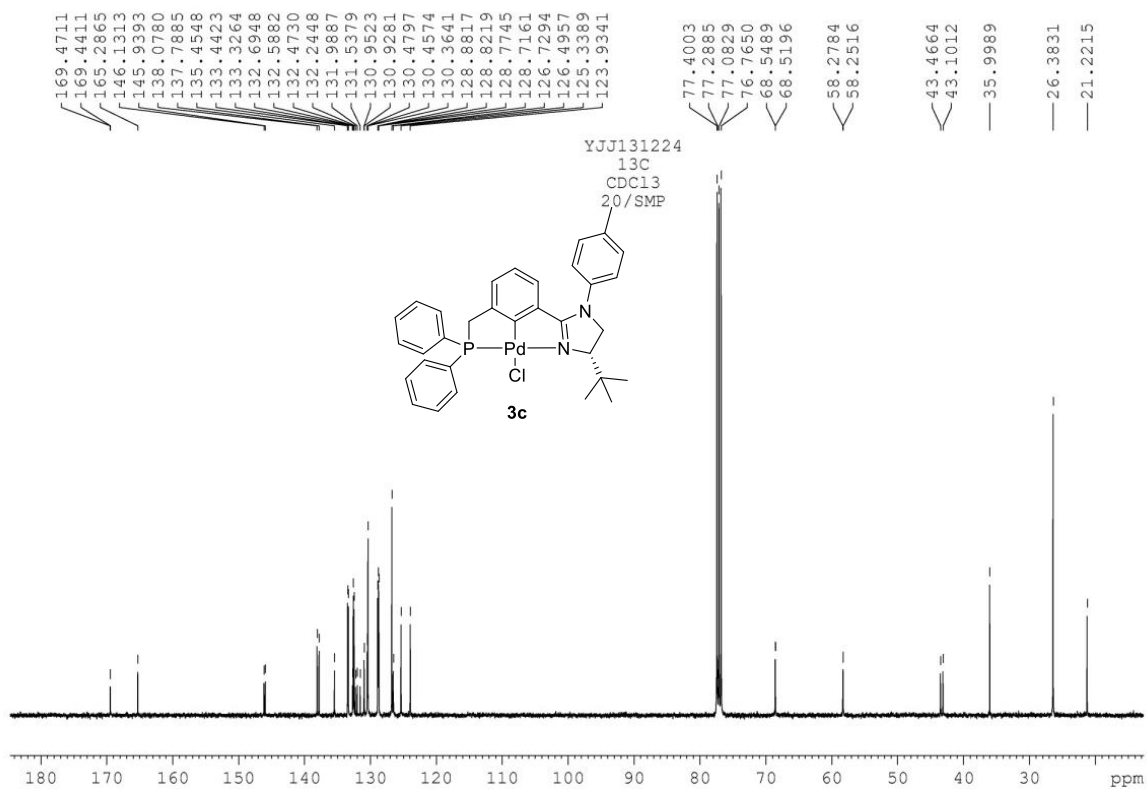

$^{13}\text{C}\{^1\text{H}\}$  NMR spectrum of **3c** (100 MHz,  $\text{CDCl}_3$ )

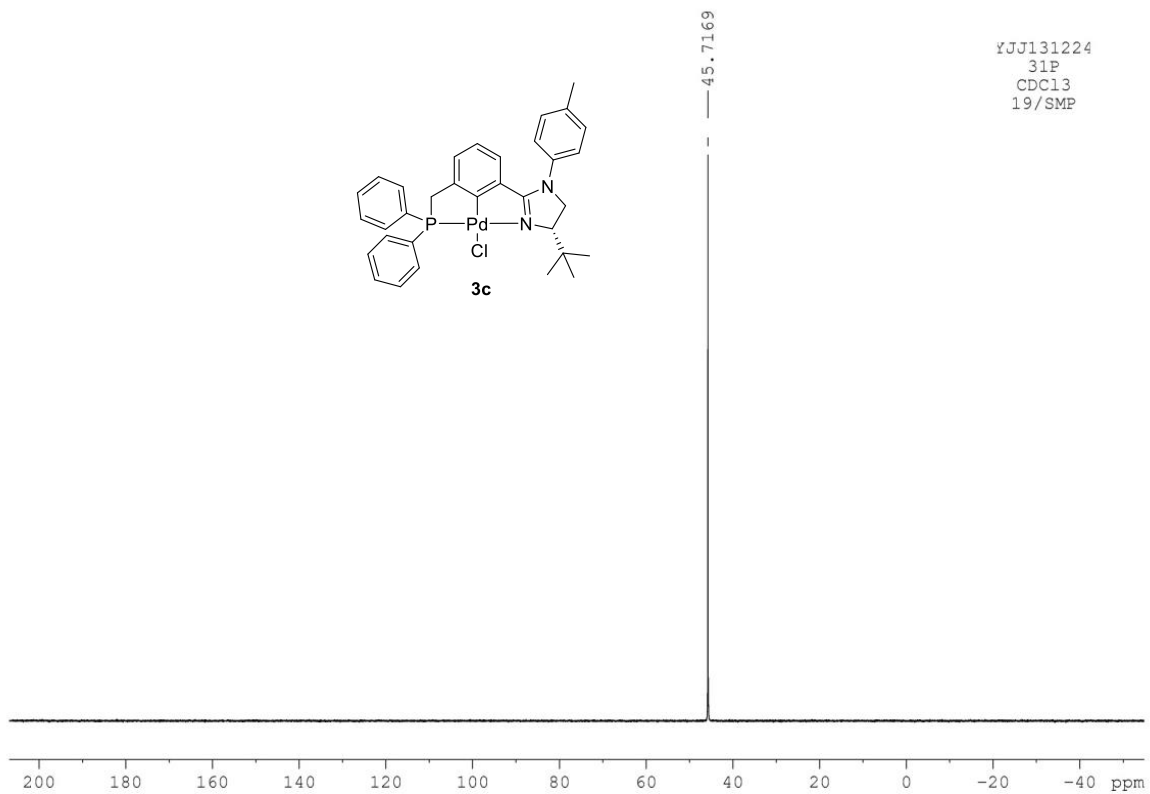

$^{31}\text{P}\{^1\text{H}\}$  NMR spectrum of **3c** (162 MHz,  $\text{CDCl}_3$ )

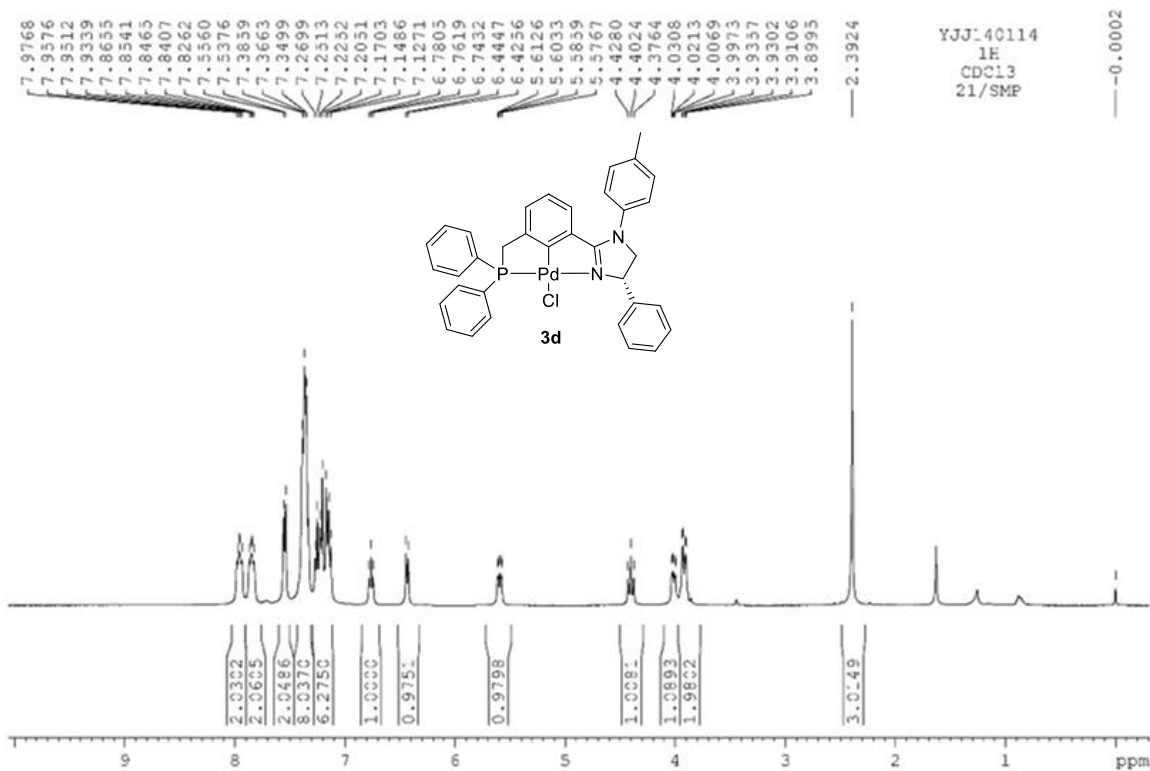

$^1\text{H}$  NMR spectrum of **3d** (400 MHz,  $\text{CDCl}_3$ )

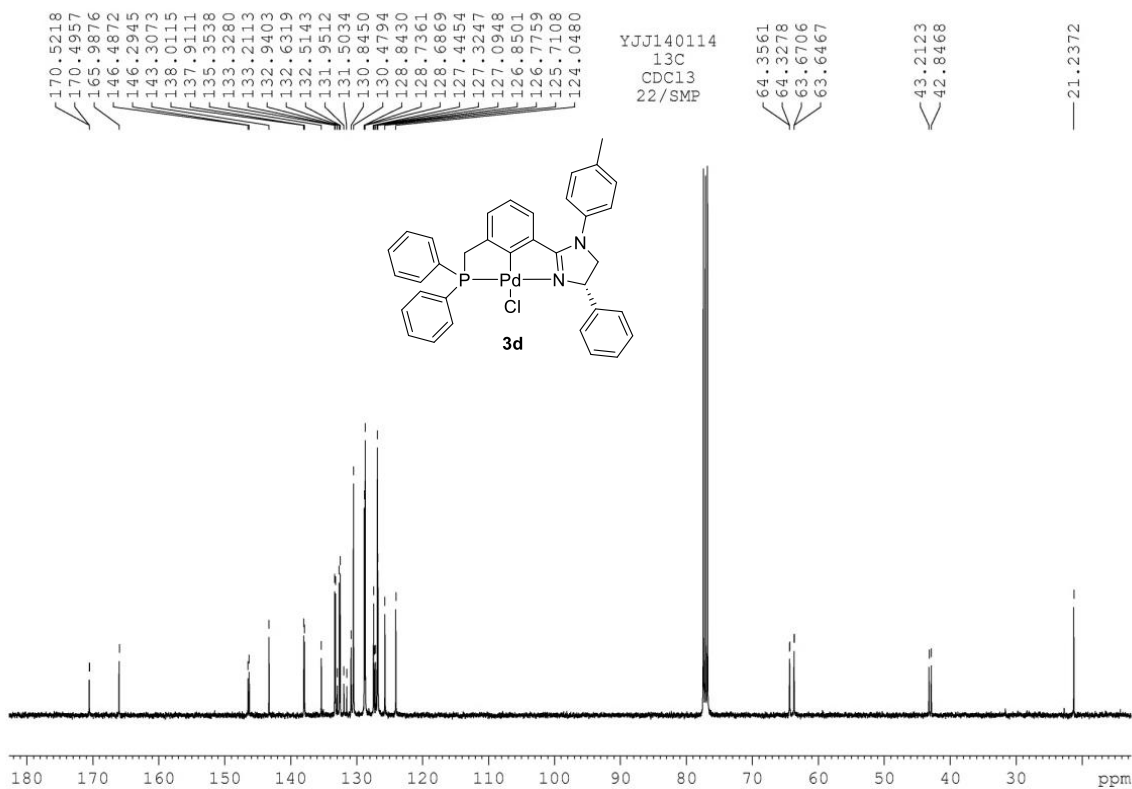

$^{13}\text{C}\{^1\text{H}\}$  NMR spectrum of **3d** (100 MHz,  $\text{CDCl}_3$ )

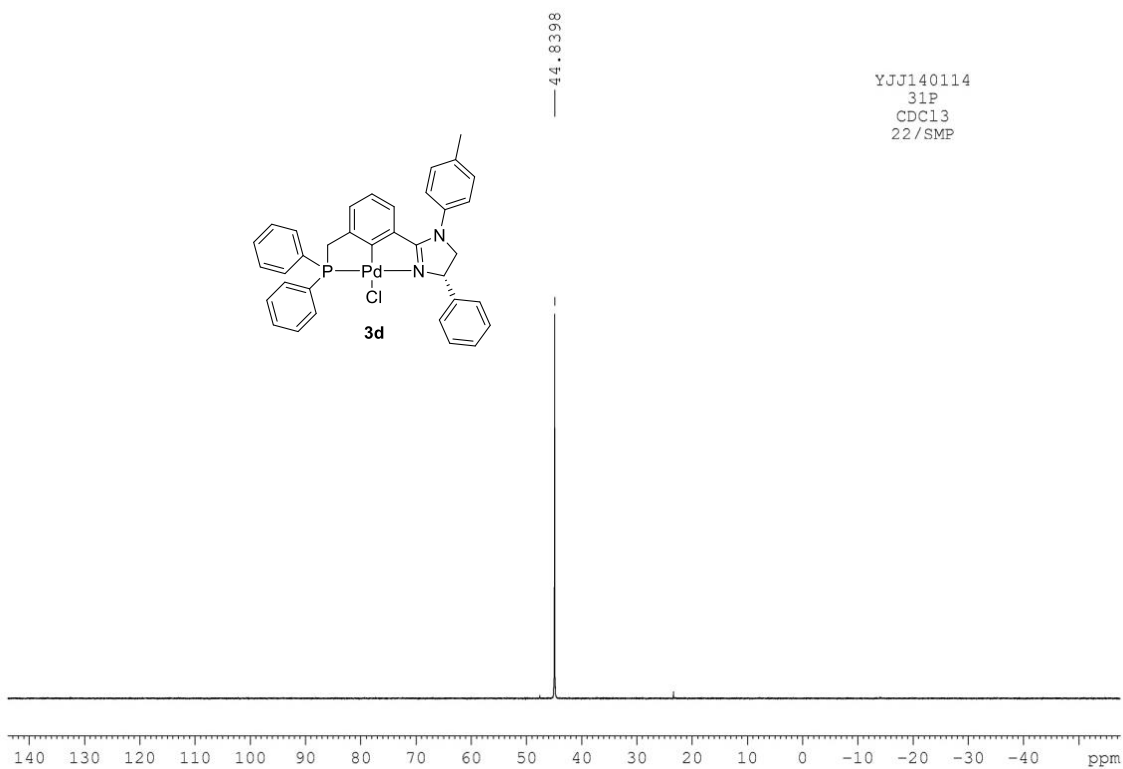

$^{31}\text{P}\{^1\text{H}\}$  NMR spectrum of **3d** (162 MHz,  $\text{CDCl}_3$ )

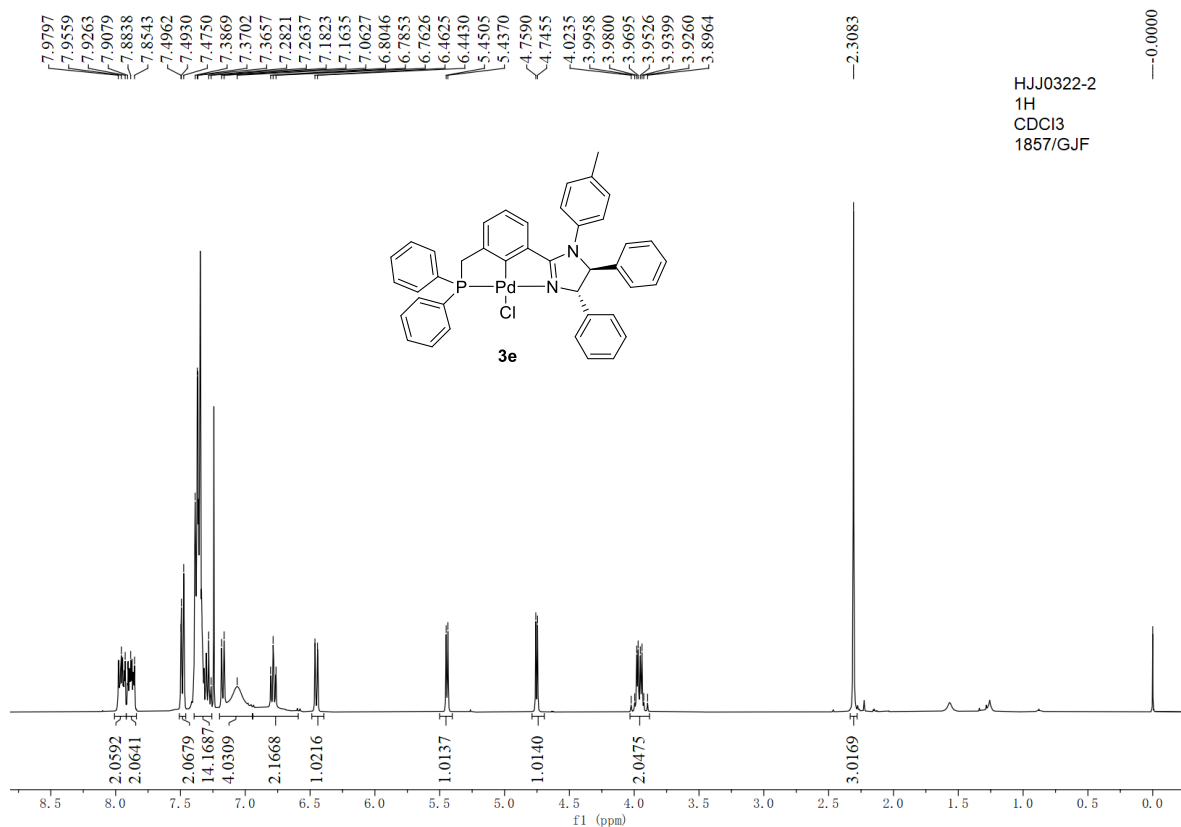

<sup>1</sup>H NMR spectrum of **3e** (400 MHz, CDCl<sub>3</sub>)

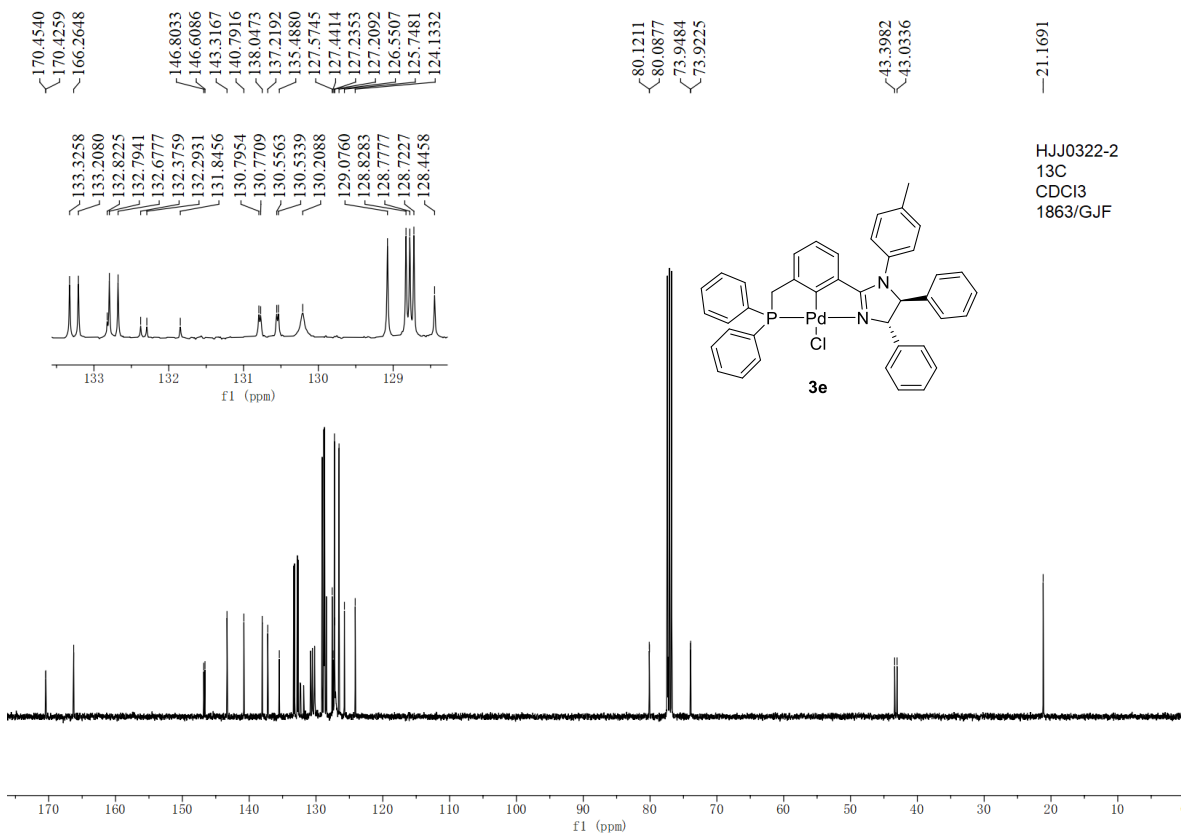

<sup>13</sup>C {<sup>1</sup>H} NMR spectrum of **3e** (100 MHz, CDCl<sub>3</sub>)

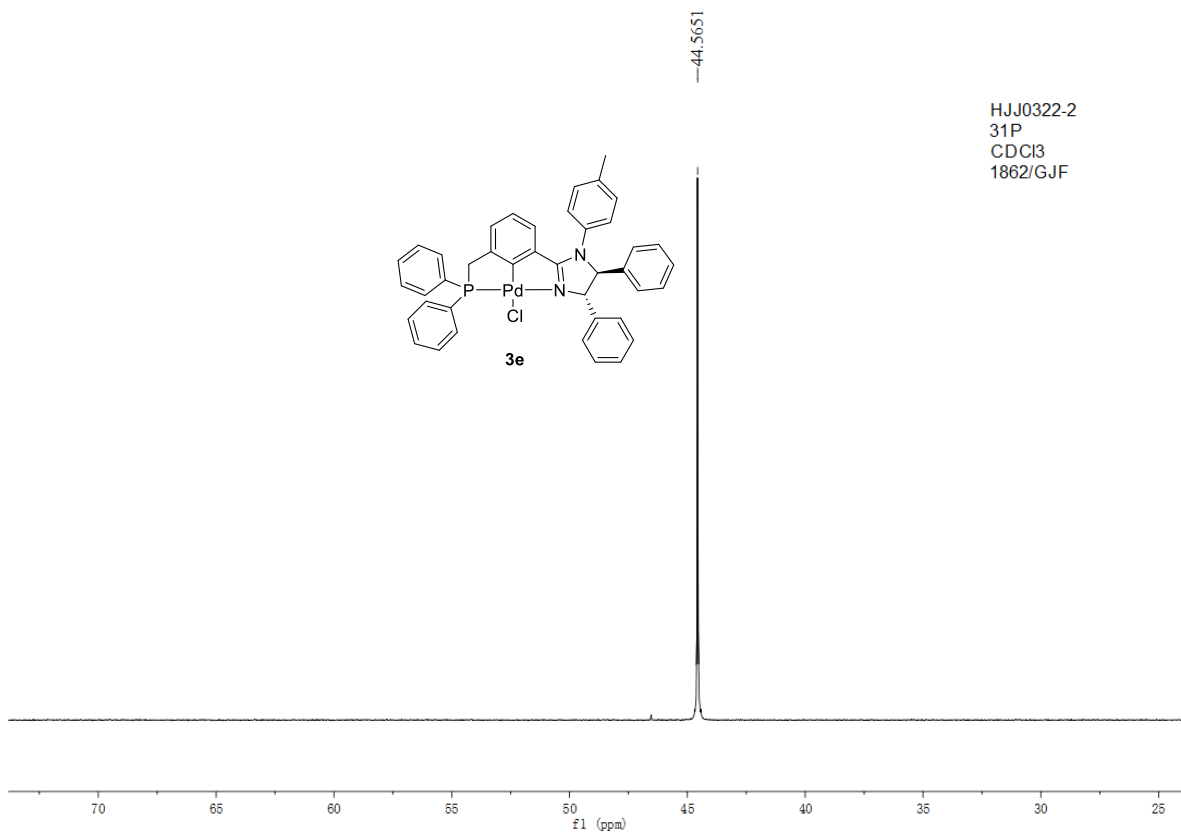

$^{31}\text{P}\{^1\text{H}\}$  NMR spectrum of **3e** (162 MHz, CDCl<sub>3</sub>)

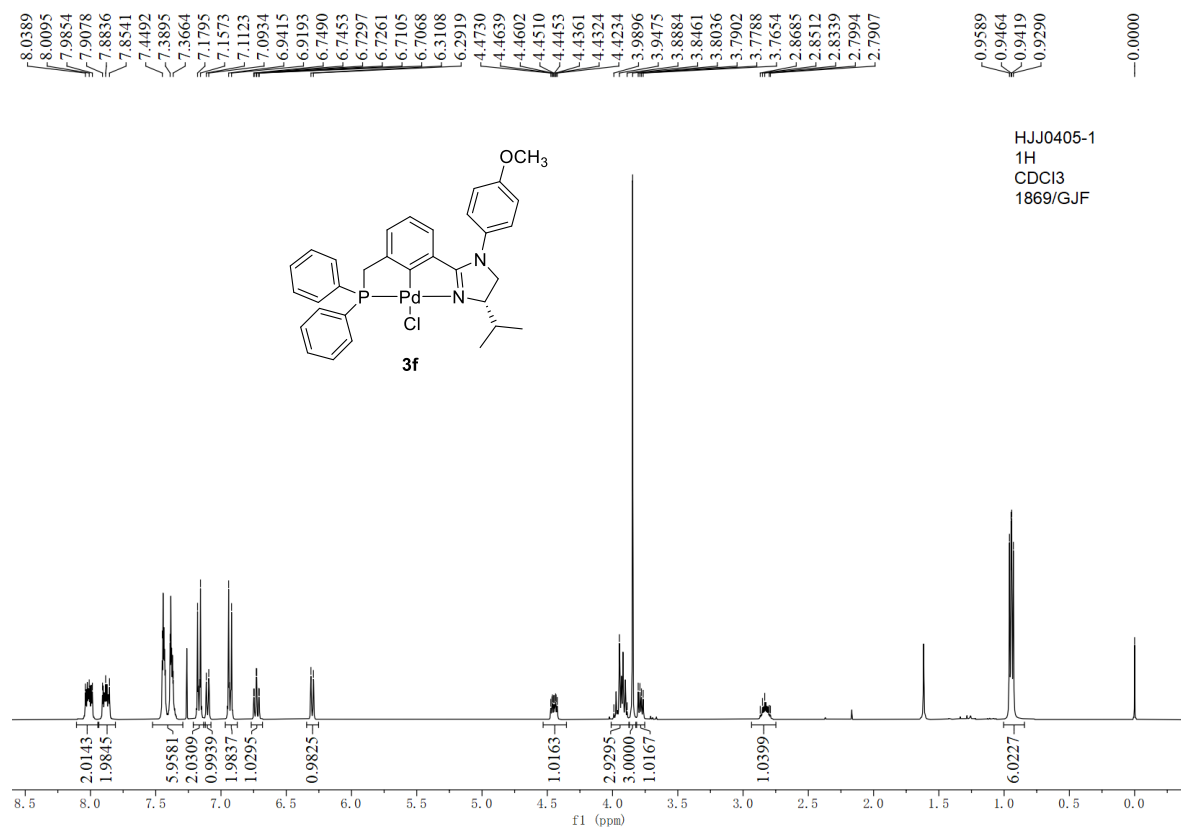

$^1\text{H}$  NMR spectrum of **3f** (400 MHz, CDCl<sub>3</sub>)



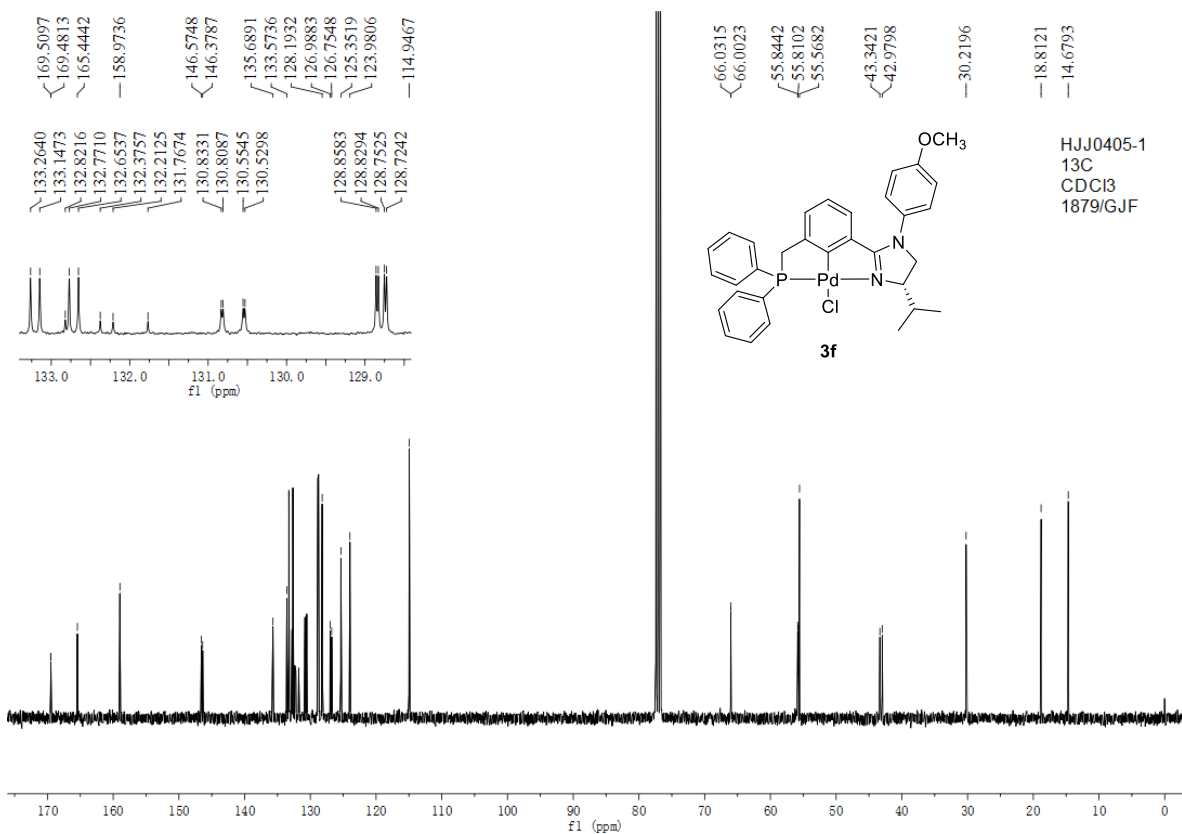

$^{13}\text{C}\{^1\text{H}\}$  NMR spectrum of **3f** (100 MHz,  $\text{CDCl}_3$ )

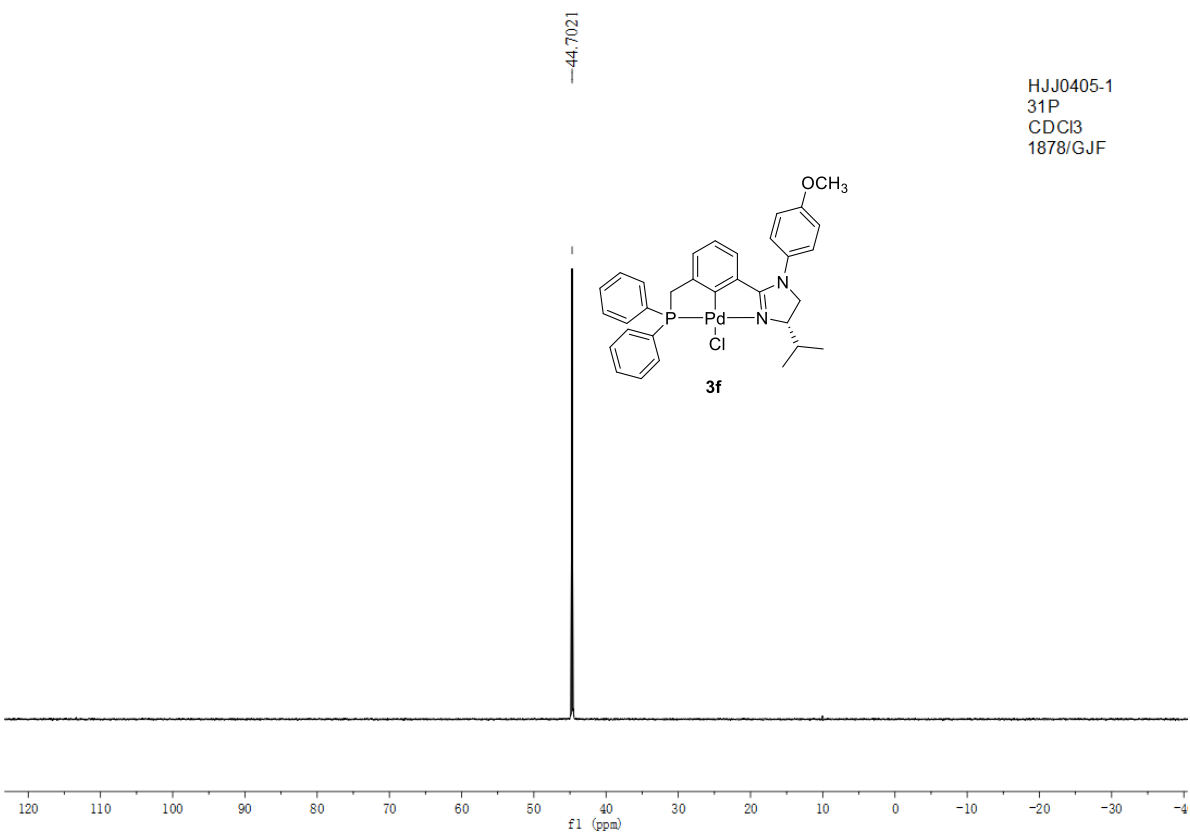

$^{31}\text{P}\{^1\text{H}\}$  NMR spectrum of **3f** (162 MHz,  $\text{CDCl}_3$ )

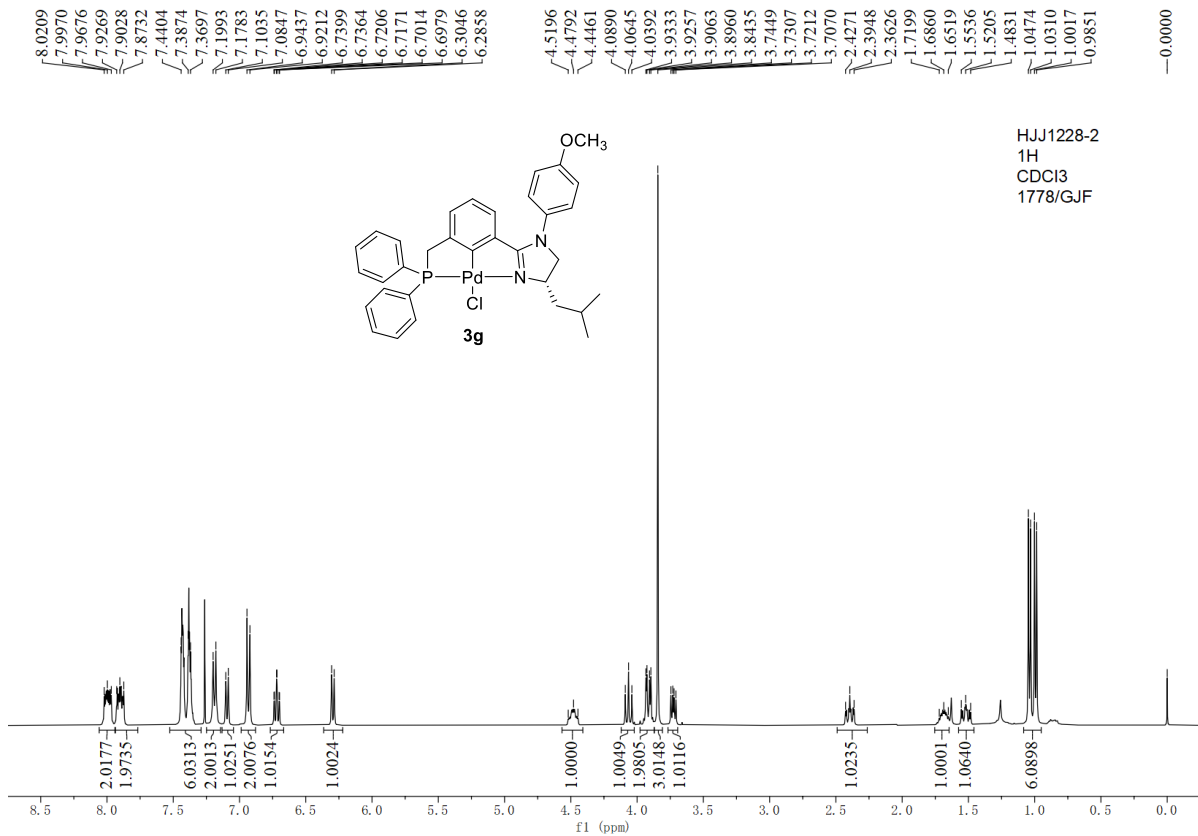

**<sup>1</sup>H NMR spectrum of 3g (400 MHz, CDCl<sub>3</sub>)**

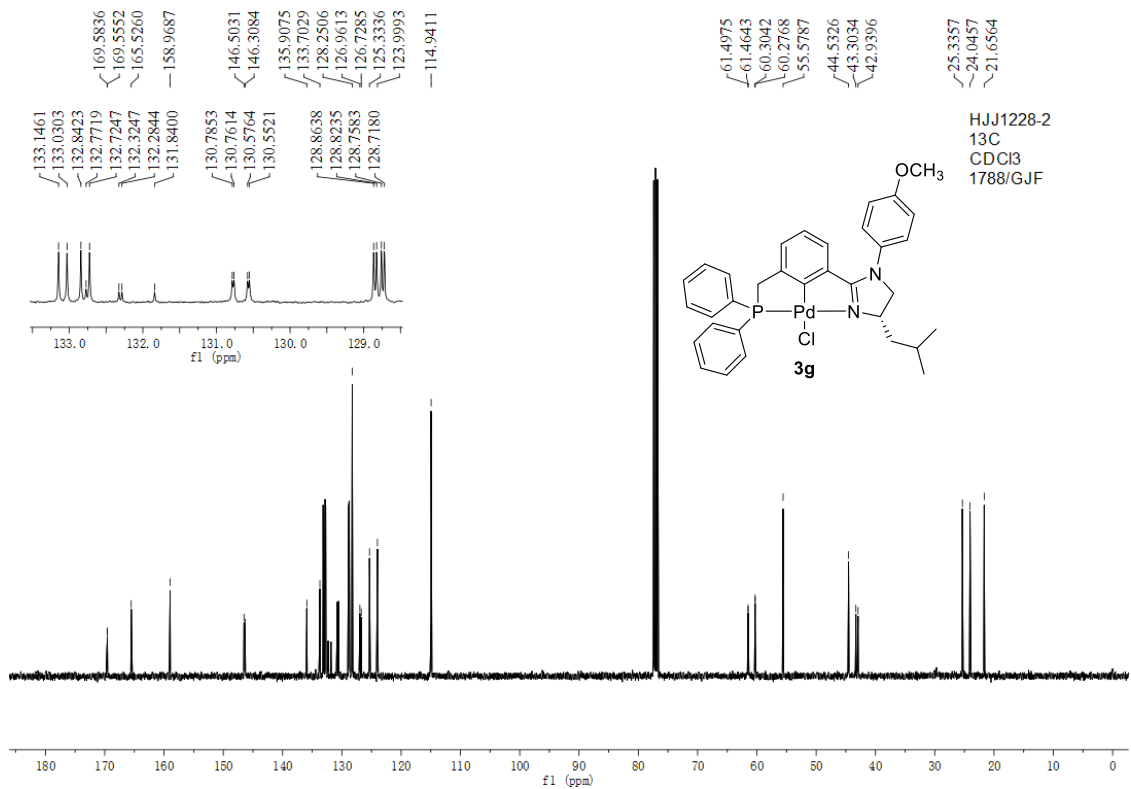

**<sup>13</sup>C {<sup>1</sup>H} NMR spectrum of 3g (100 MHz, CDCl<sub>3</sub>)**

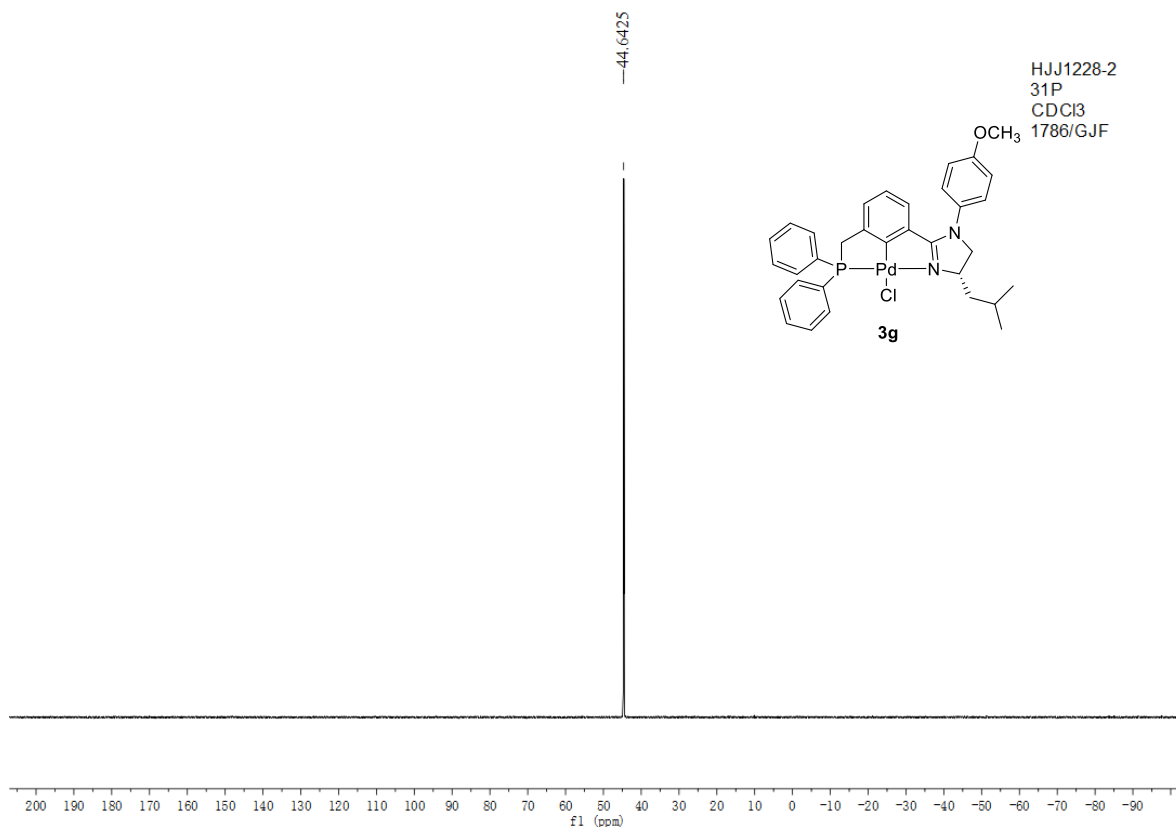

$^{31}\text{P}\{^1\text{H}\}$  NMR spectrum of **3g** (162 MHz,  $\text{CDCl}_3$ )

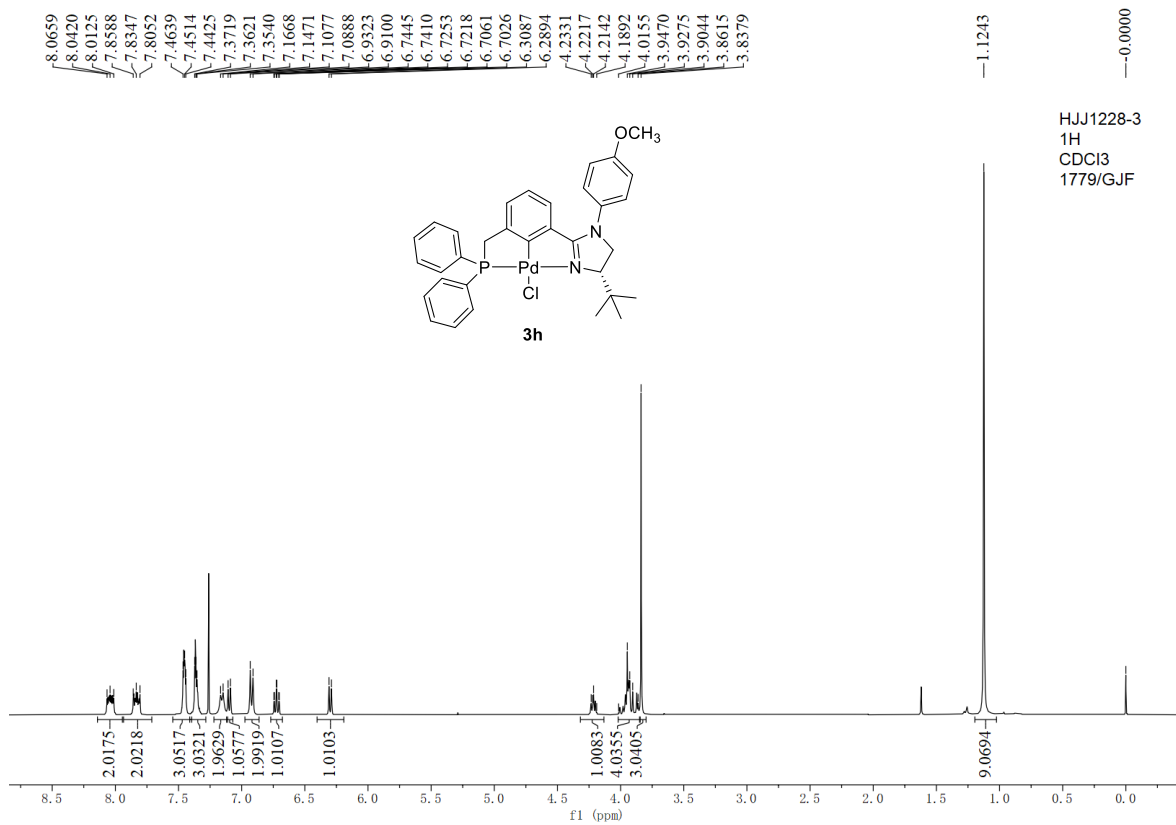

$^1\text{H}$  NMR spectrum of **3h** (400 MHz,  $\text{CDCl}_3$ )

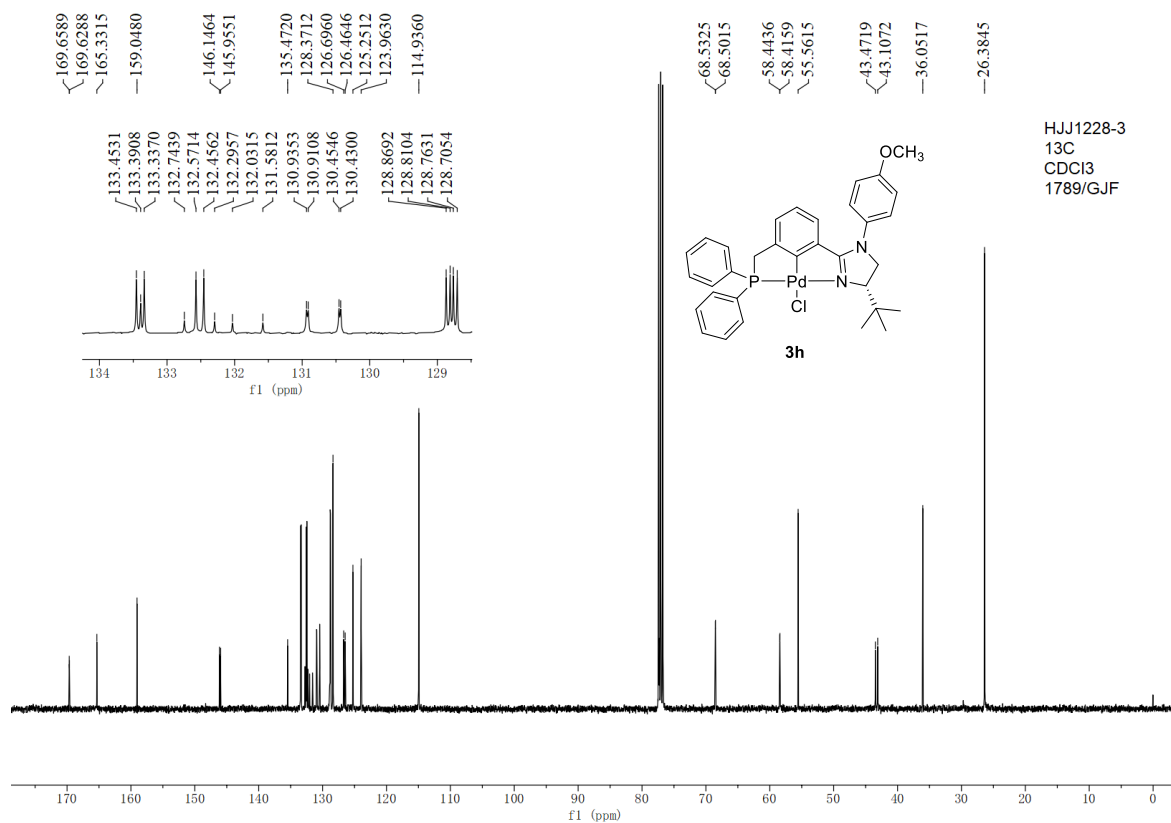

<sup>13</sup>C{<sup>1</sup>H} NMR spectrum of **3h** (100 MHz, CDCl<sub>3</sub>)

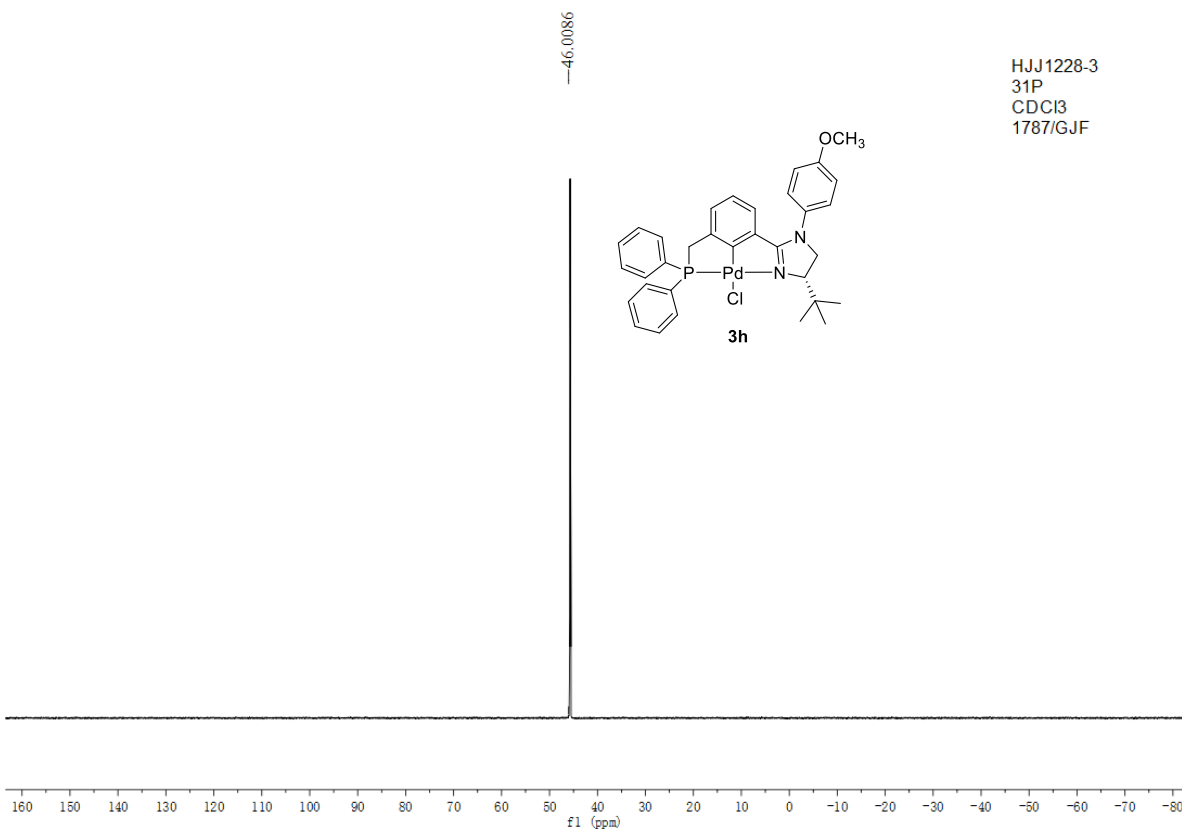

<sup>31</sup>P{<sup>1</sup>H} NMR spectrum of **3h** (162 MHz, CDCl<sub>3</sub>)

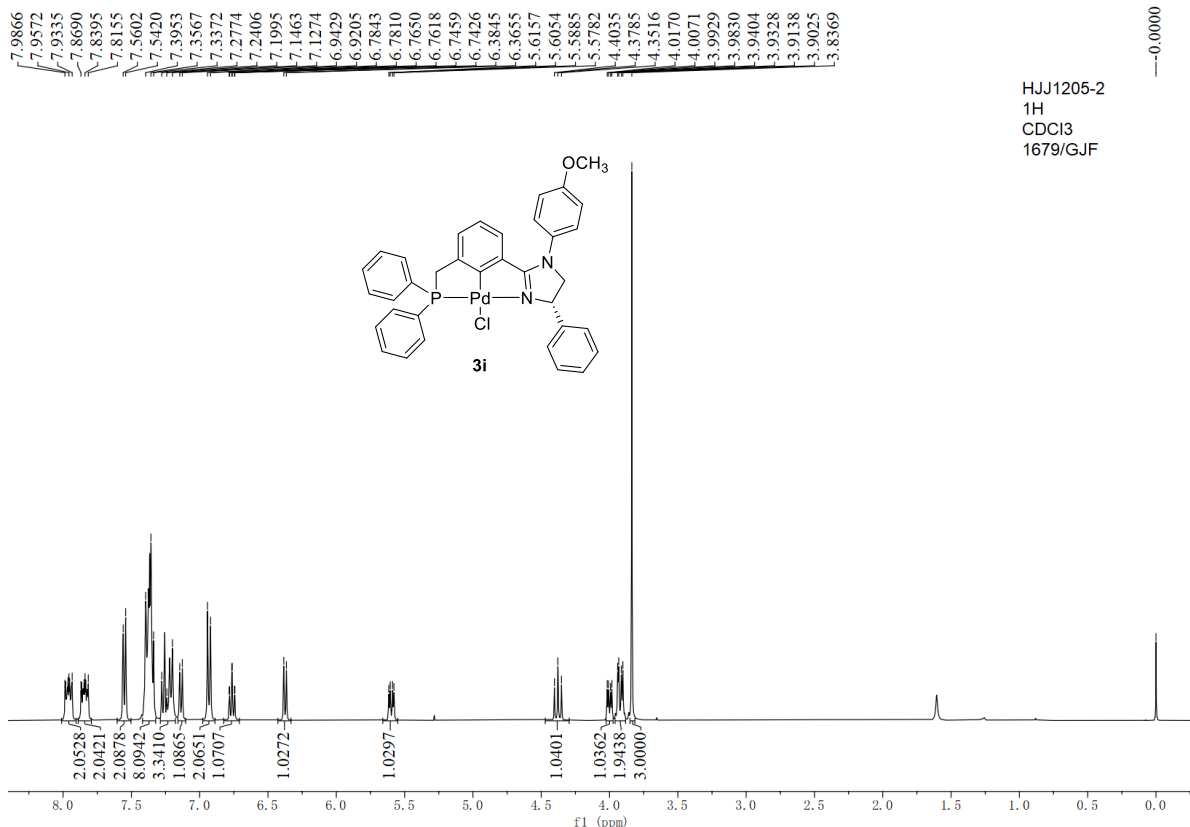

<sup>1</sup>H NMR spectrum of **3i** (400 MHz, CDCl<sub>3</sub>)

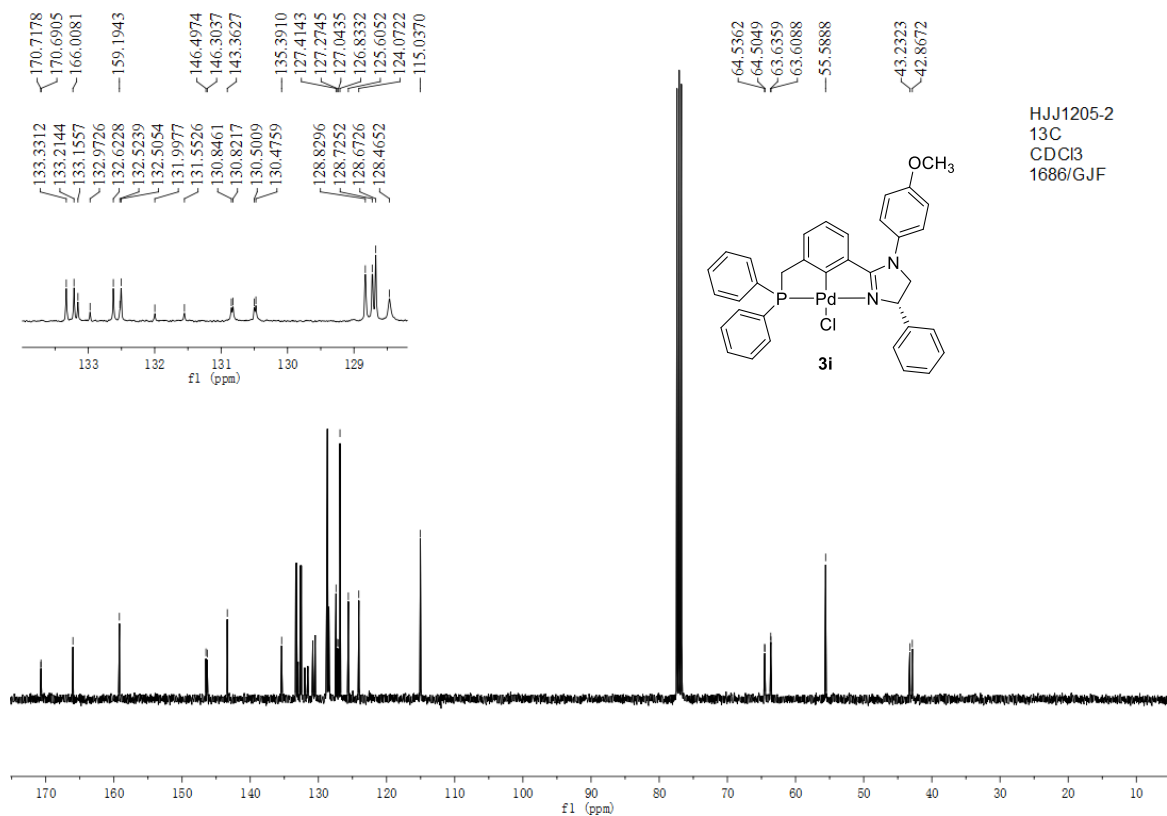

<sup>13</sup>C {<sup>1</sup>H} NMR spectrum of **3i** (100 MHz, CDCl<sub>3</sub>)

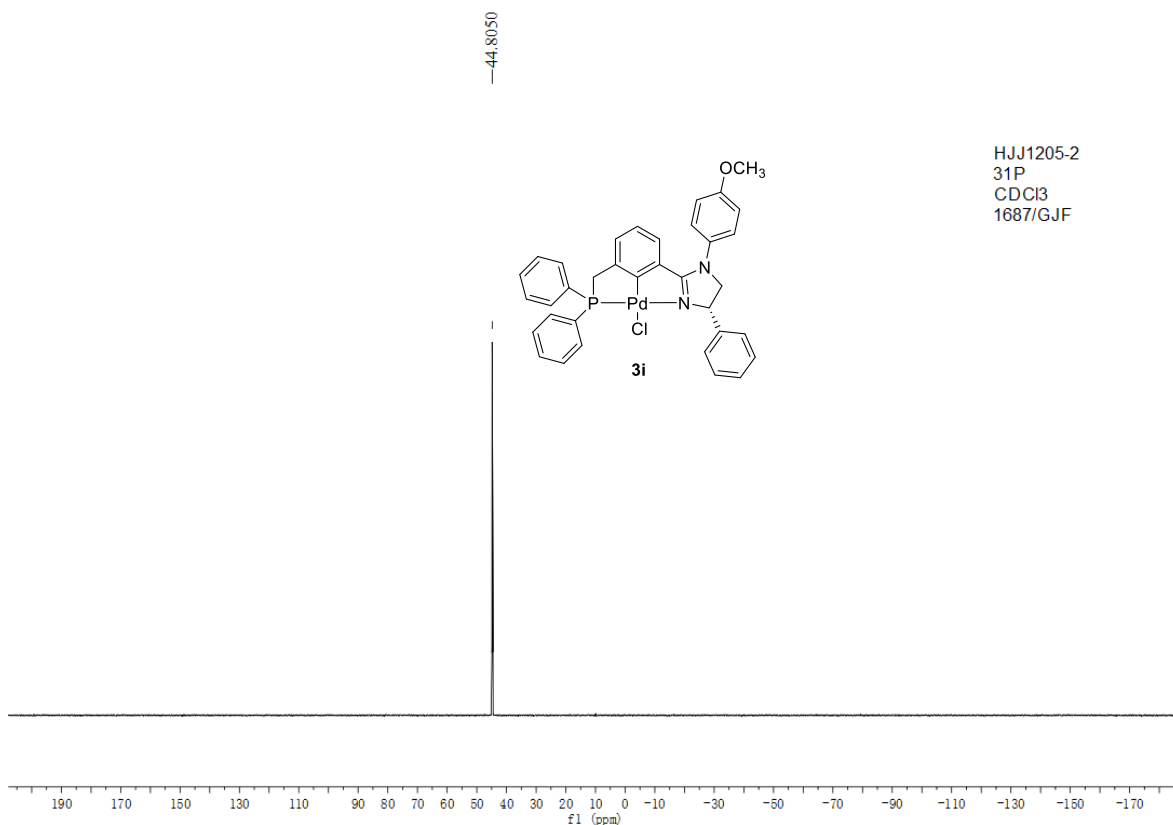

$^{31}\text{P}\{^1\text{H}\}$  NMR spectrum of **3i** (162 MHz,  $\text{CDCl}_3$ )

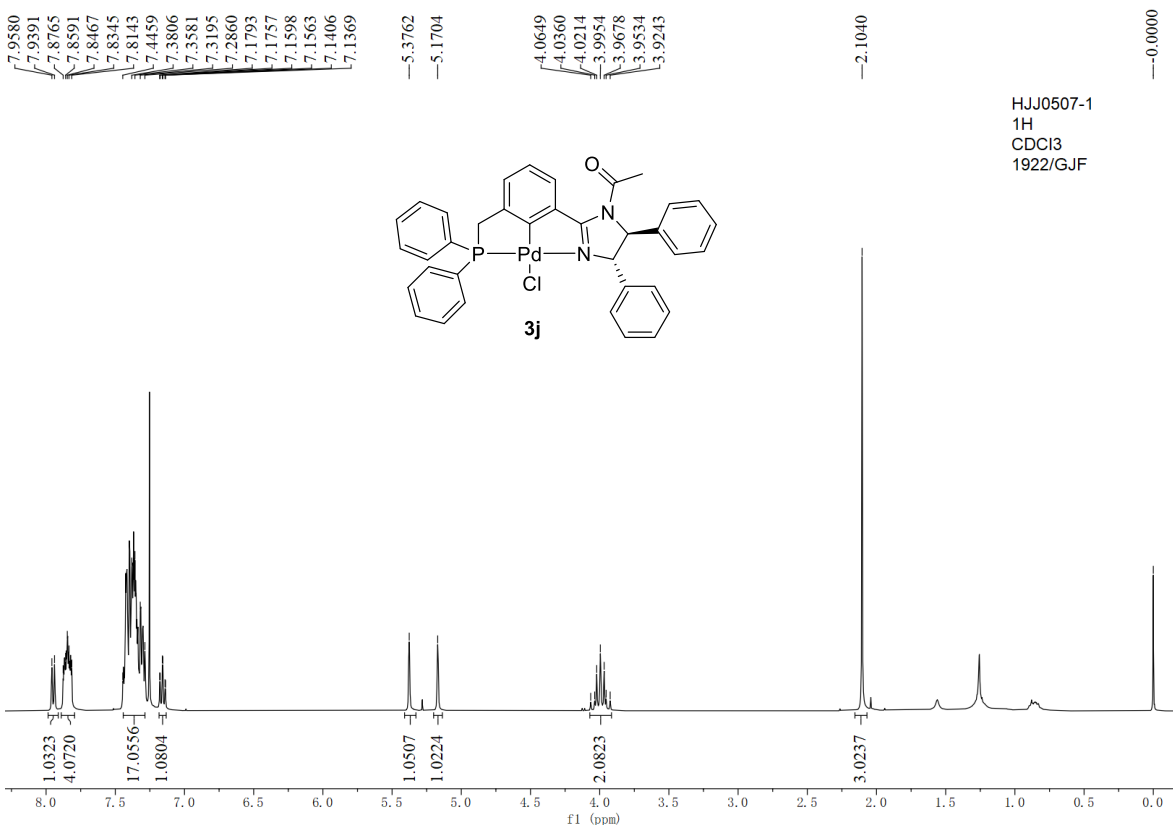

$^1\text{H}$  NMR spectrum of **3j** (400 MHz,  $\text{CDCl}_3$ )

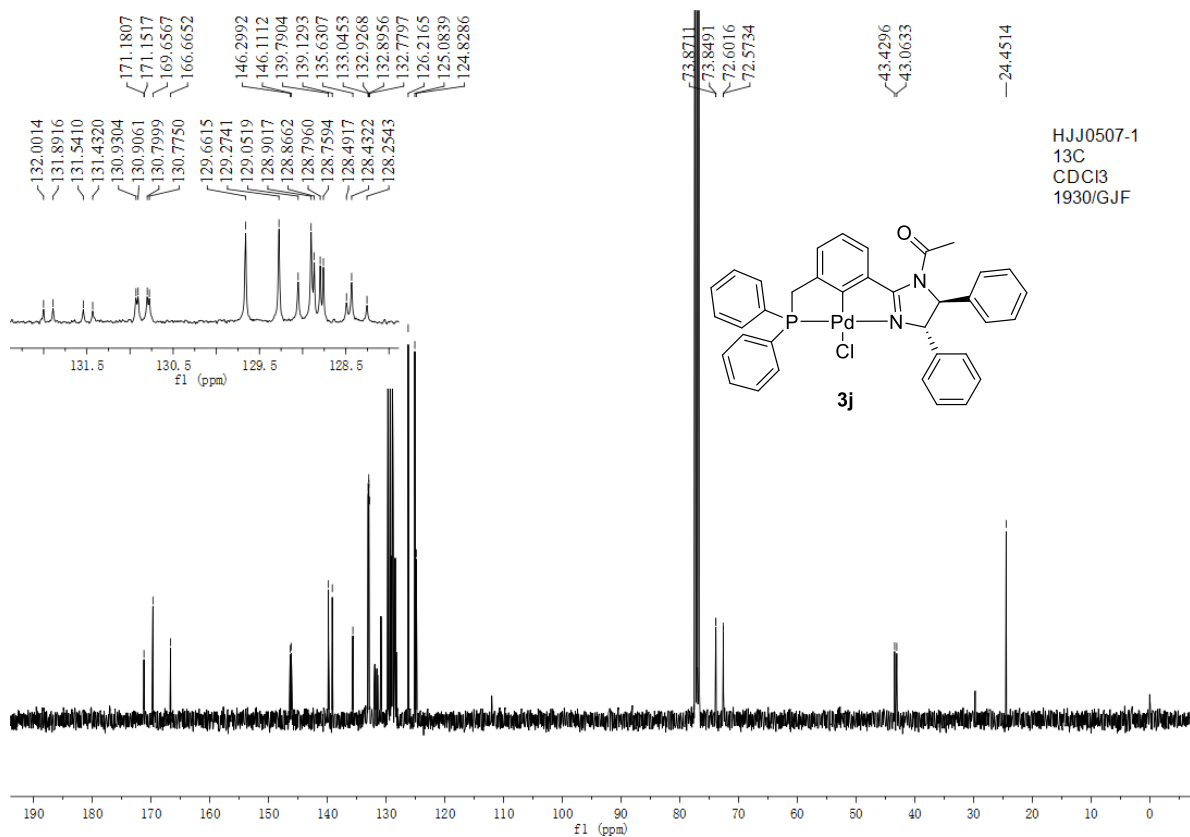

<sup>13</sup>C {<sup>1</sup>H} NMR spectrum of **3j** (100 MHz, CDCl<sub>3</sub>)

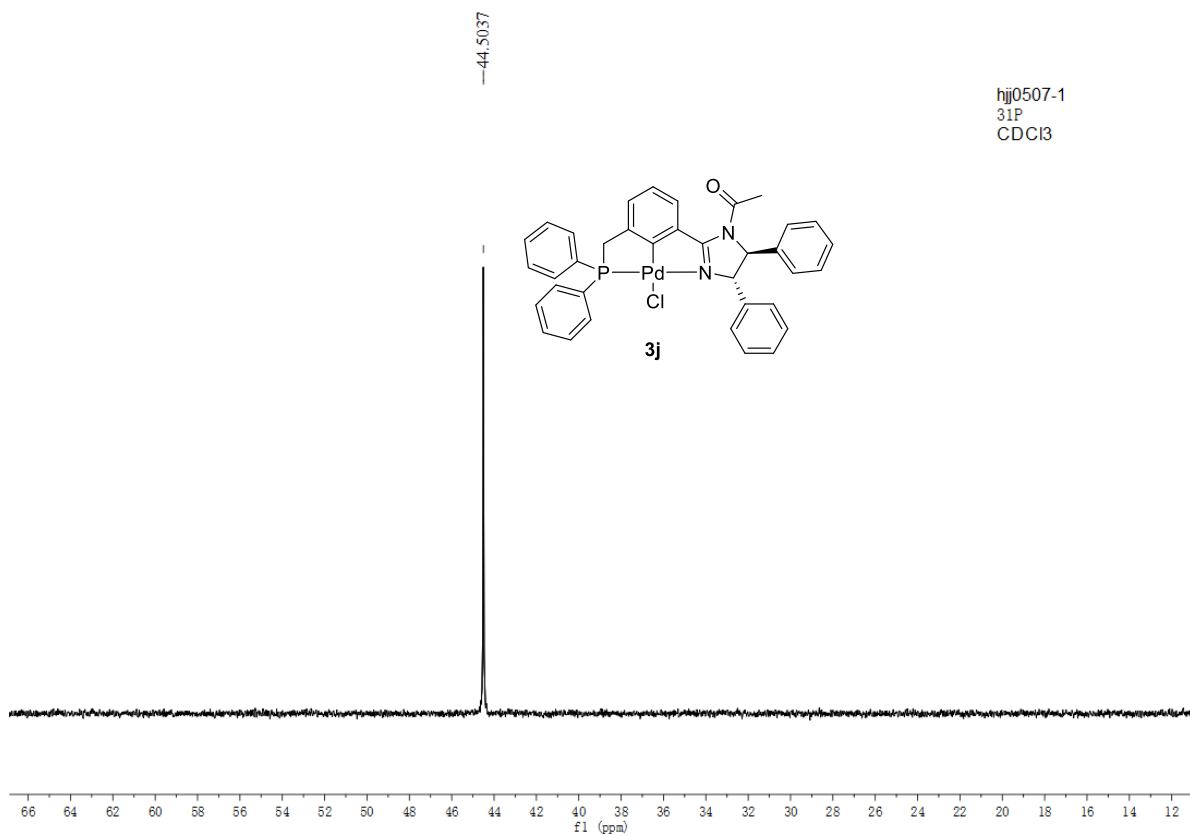

<sup>31</sup>P {<sup>1</sup>H} NMR spectrum of **3j** (162 MHz, CDCl<sub>3</sub>)

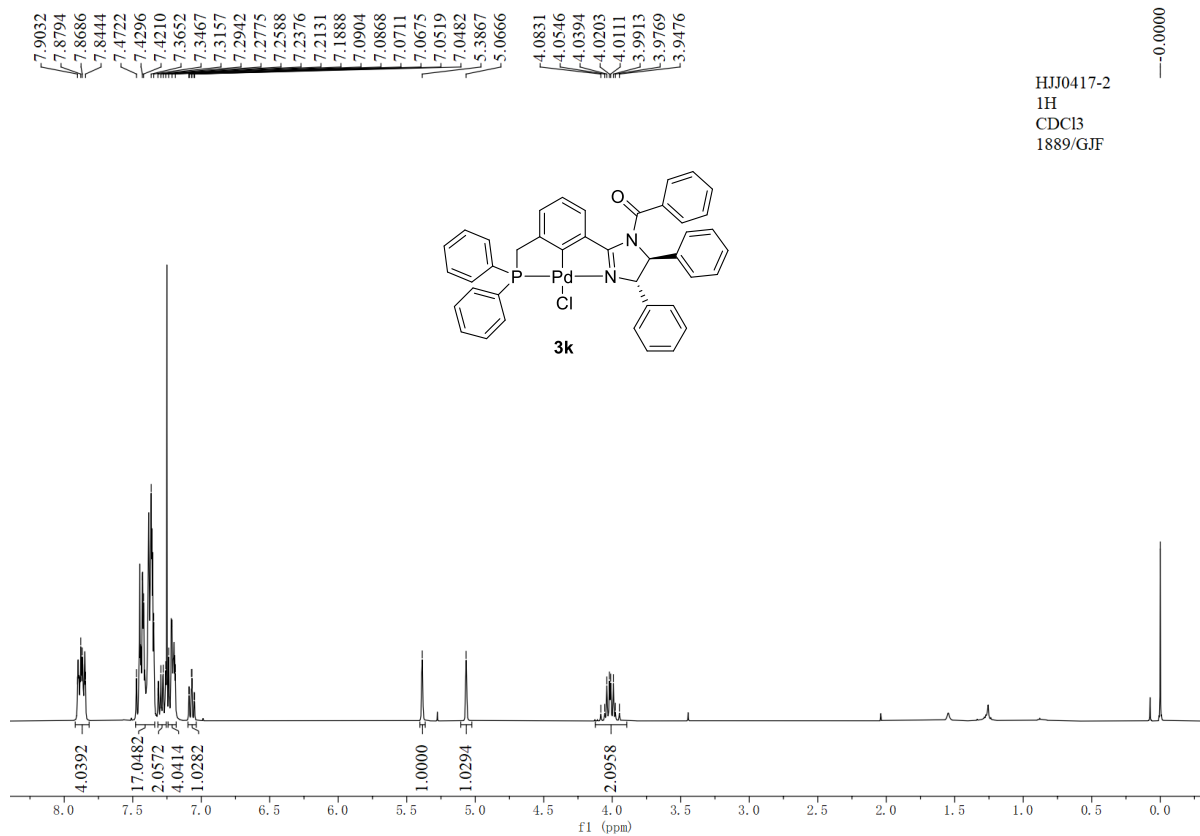

<sup>1</sup>H NMR spectrum of **3k** (400 MHz, CDCl<sub>3</sub>)

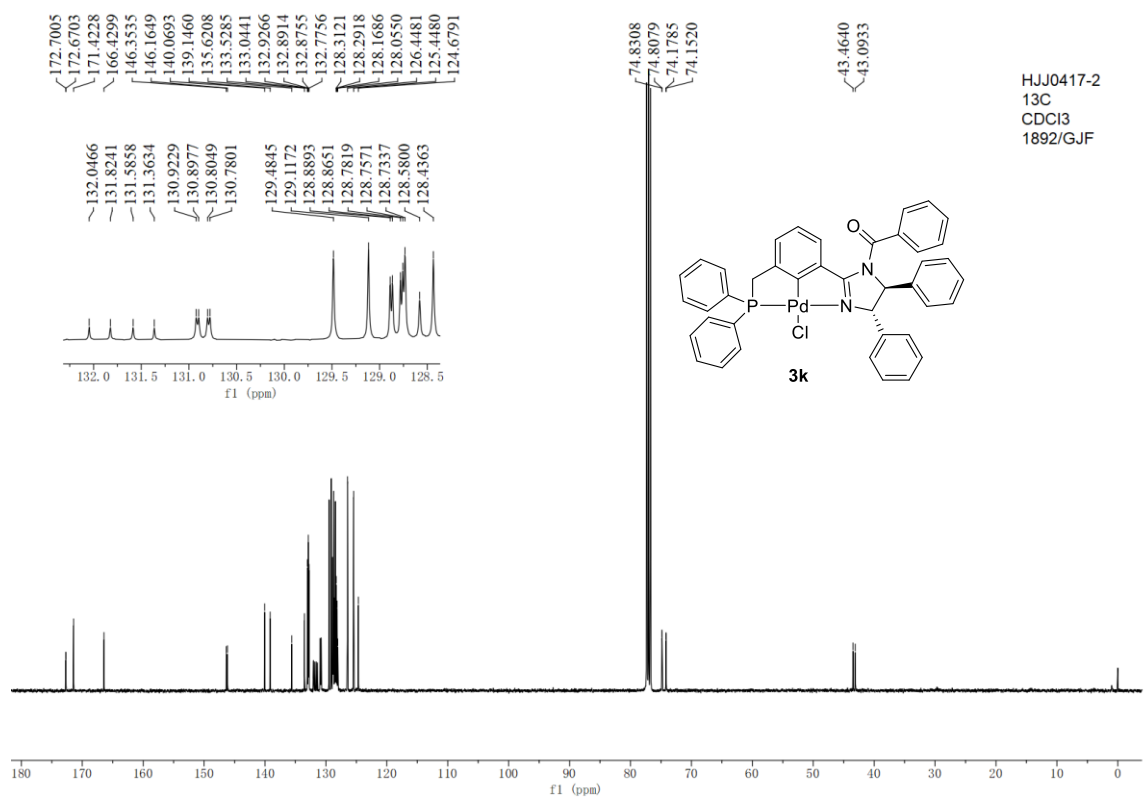

<sup>13</sup>C{<sup>1</sup>H} NMR spectrum of **3k** (100 MHz, CDCl<sub>3</sub>)



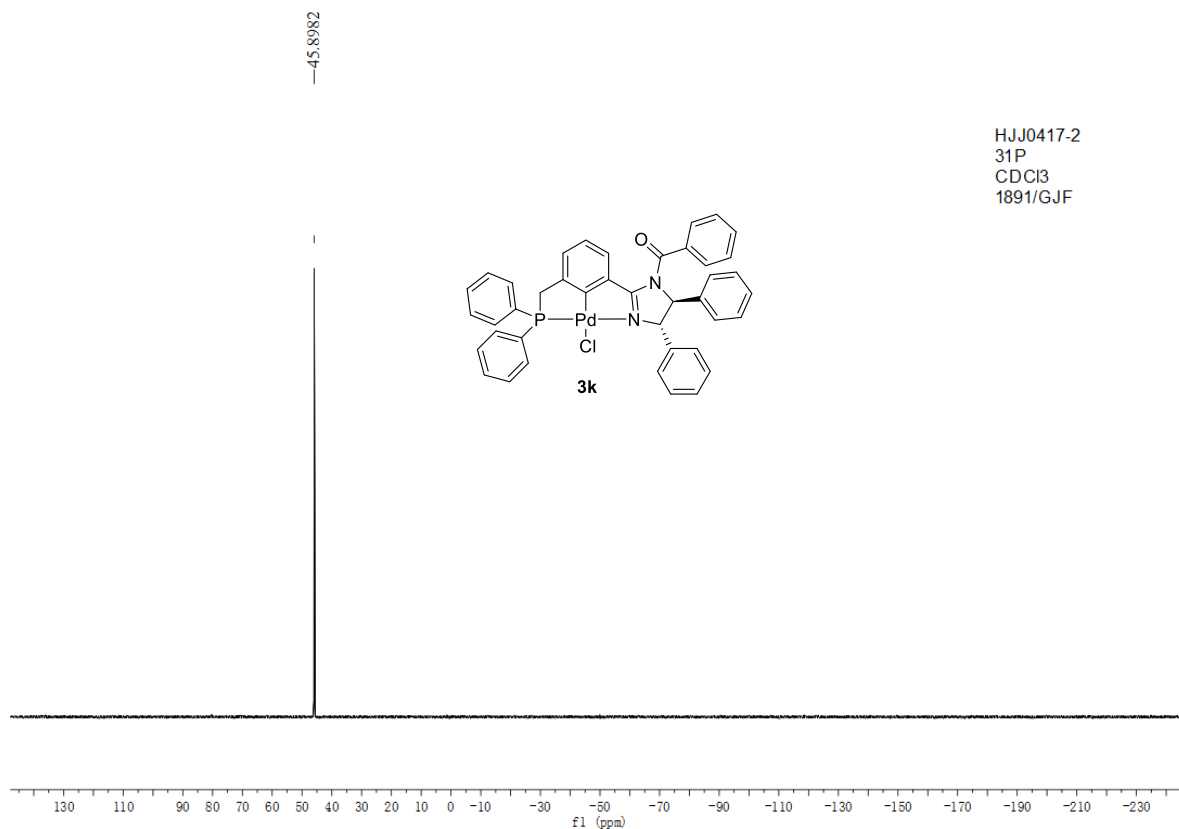

<sup>31</sup>P{<sup>1</sup>H} NMR spectrum of **3k** (162 MHz, CDCl<sub>3</sub>)

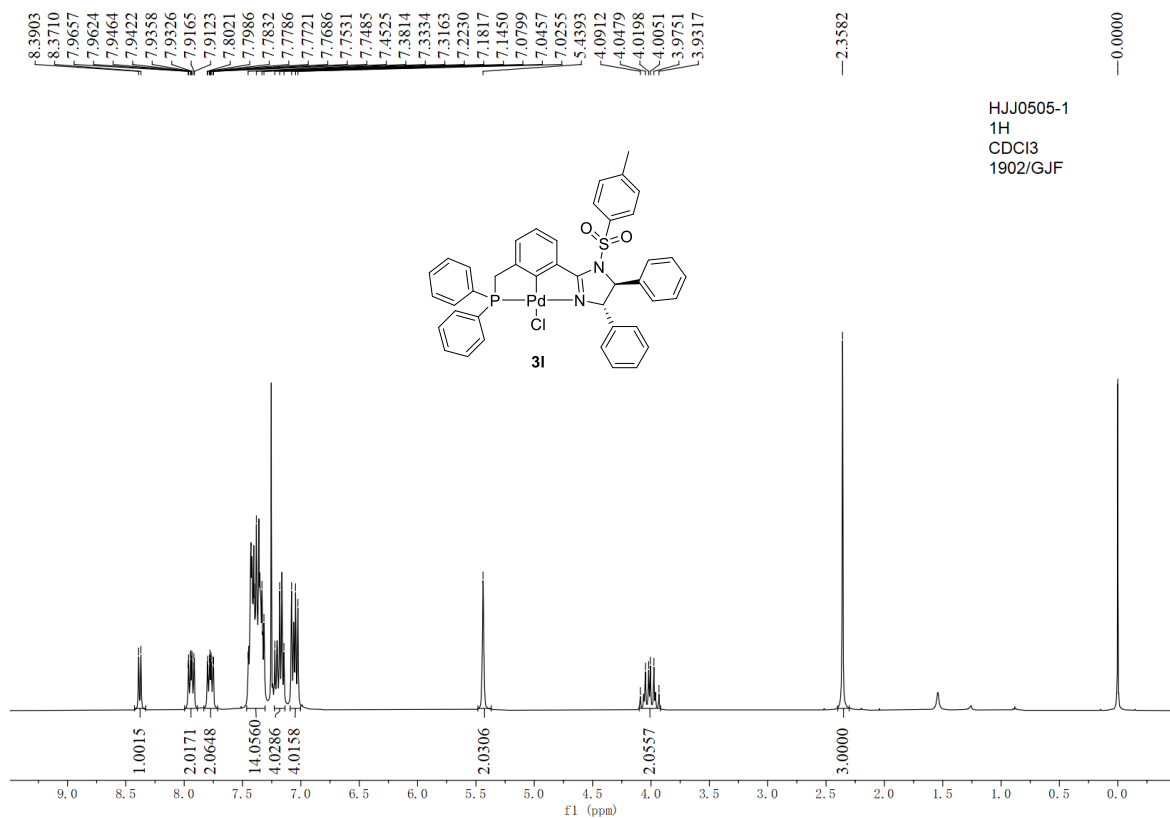

<sup>1</sup>H NMR spectrum of **3l** (400 MHz, CDCl<sub>3</sub>)

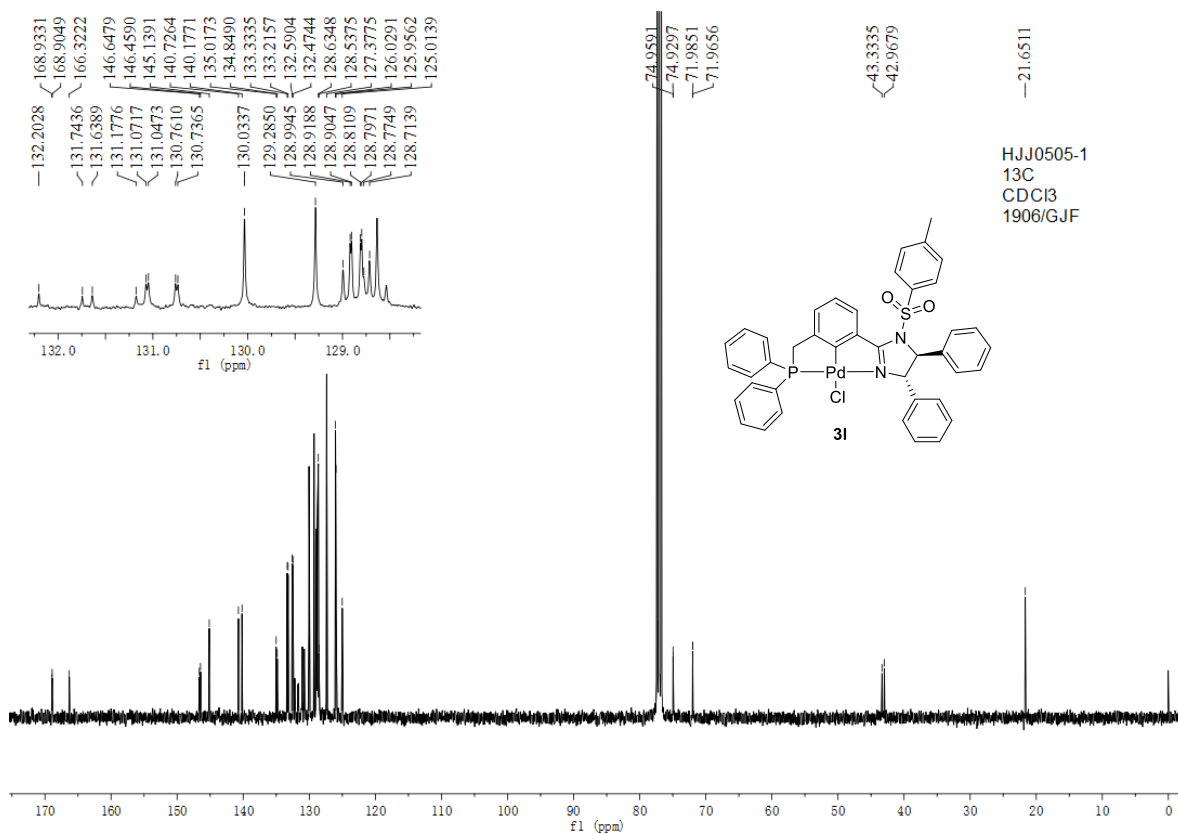

<sup>13</sup>C {<sup>1</sup>H} NMR spectrum of **31** (100 MHz, CDCl<sub>3</sub>)

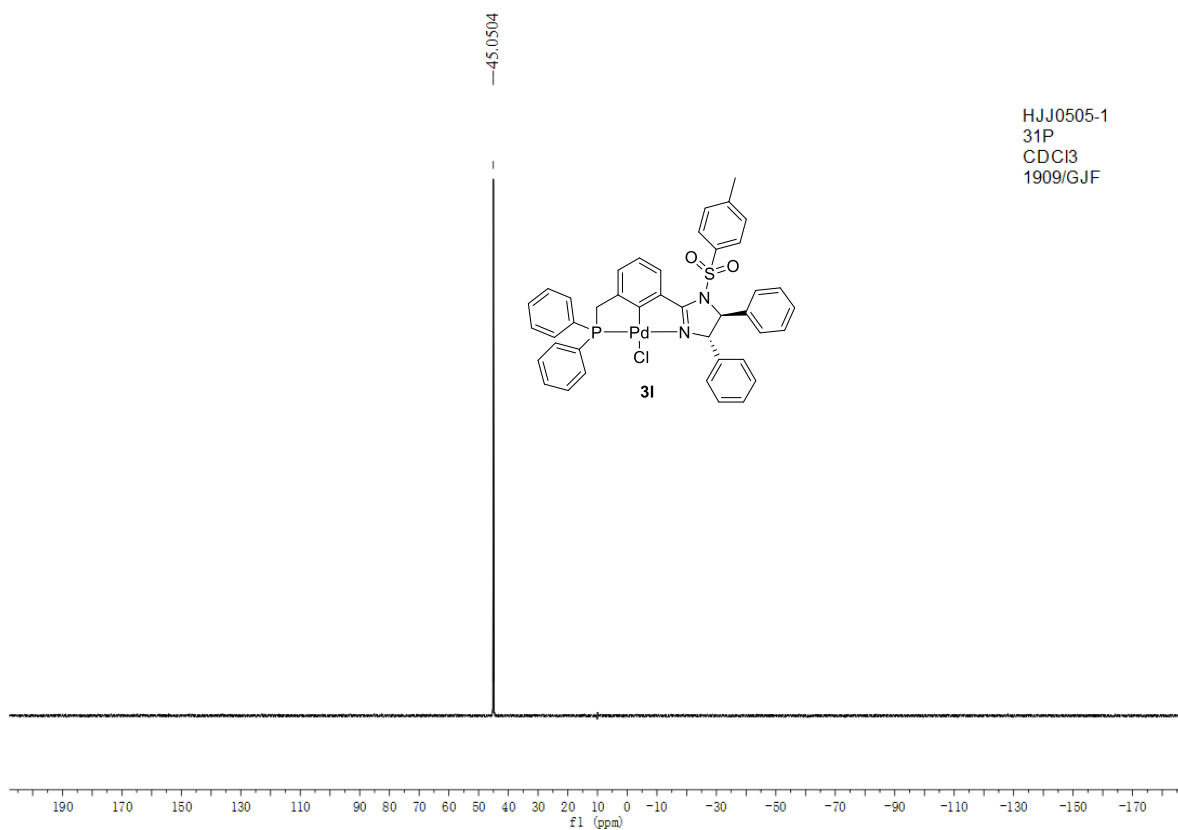

<sup>31</sup>P {<sup>1</sup>H} NMR spectrum of **31** (162 MHz, CDCl<sub>3</sub>)

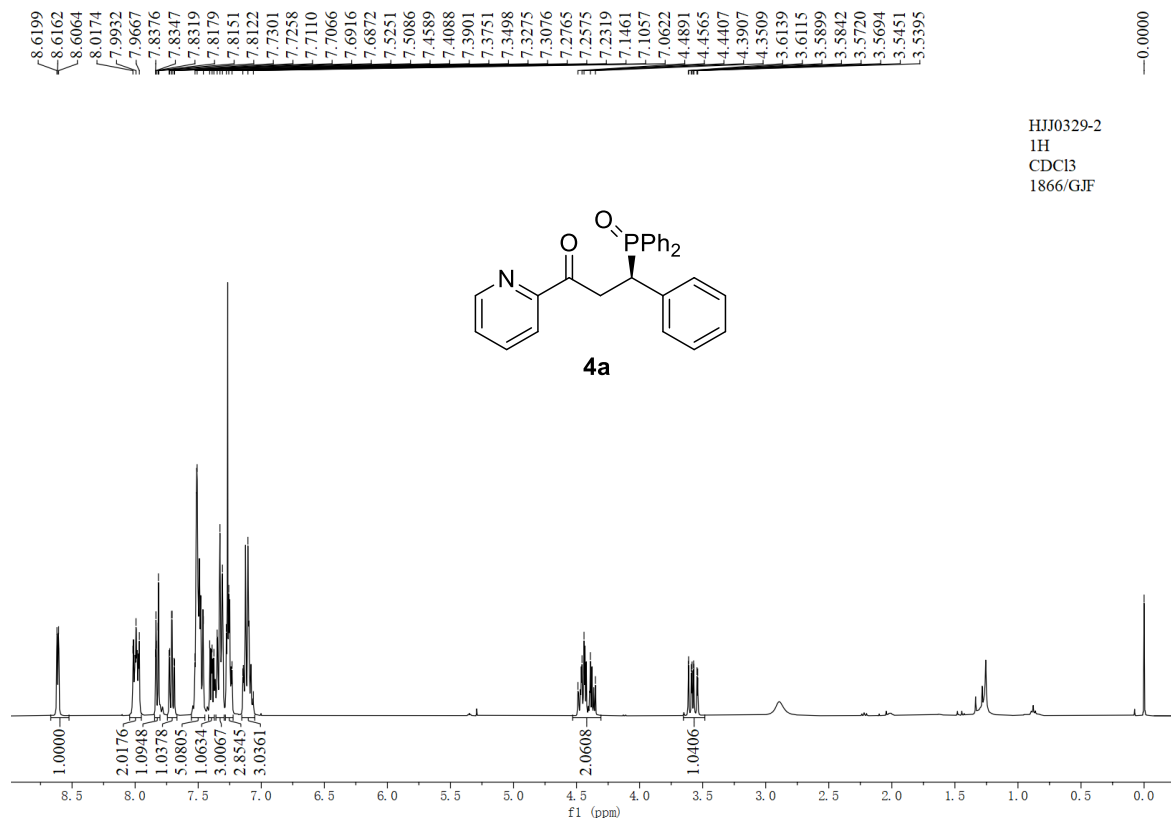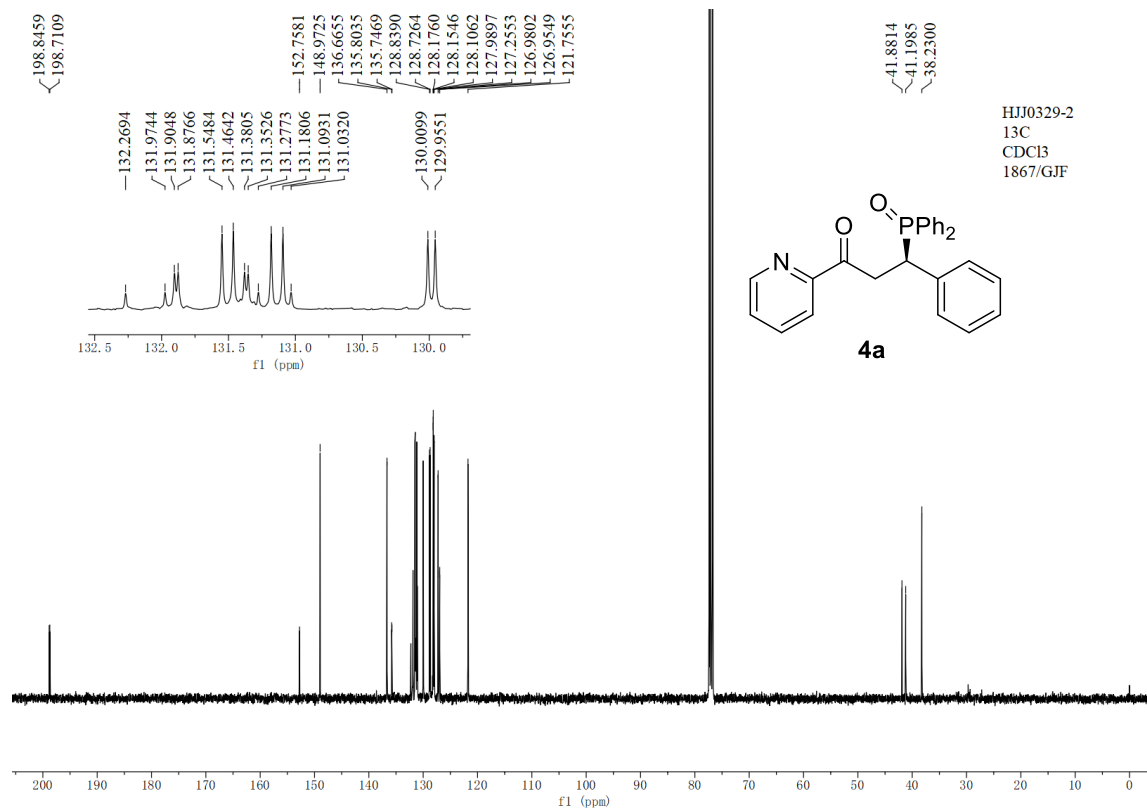

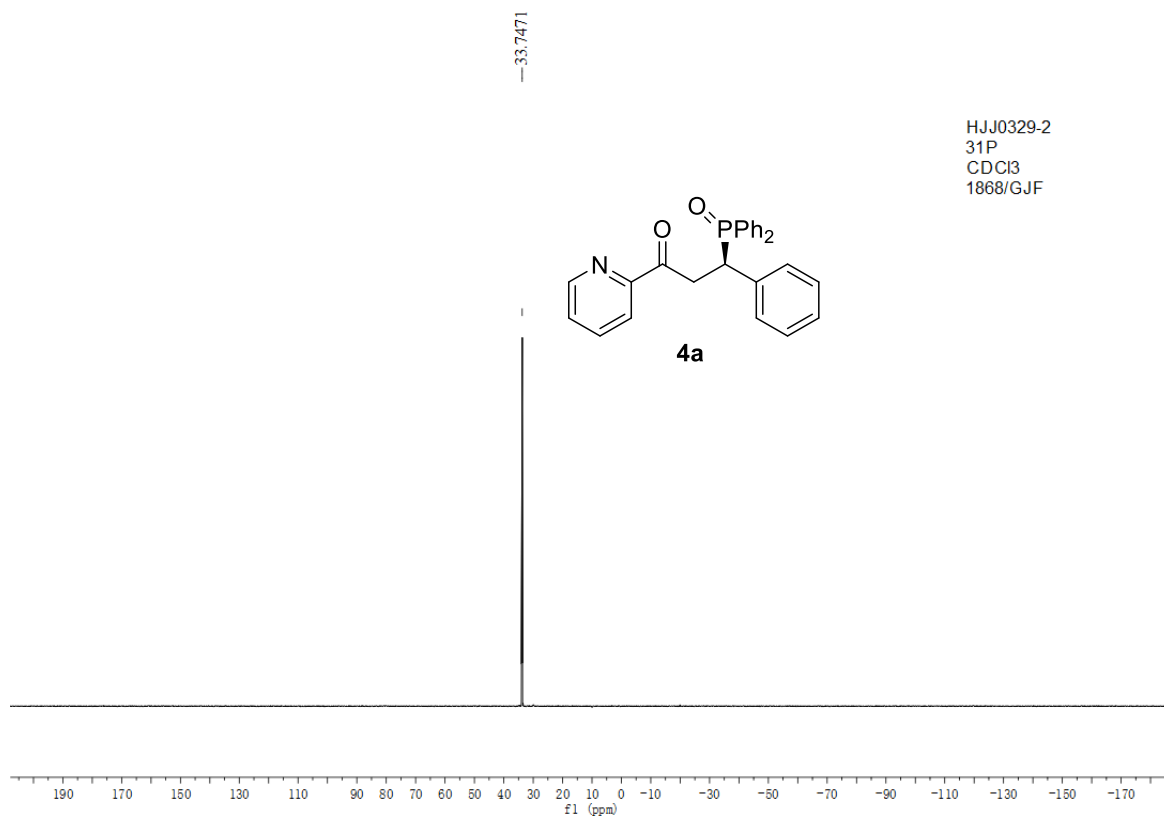

$^{31}\text{P}\{^1\text{H}\}$  NMR spectrum of **4a** (162 MHz,  $\text{CDCl}_3$ )

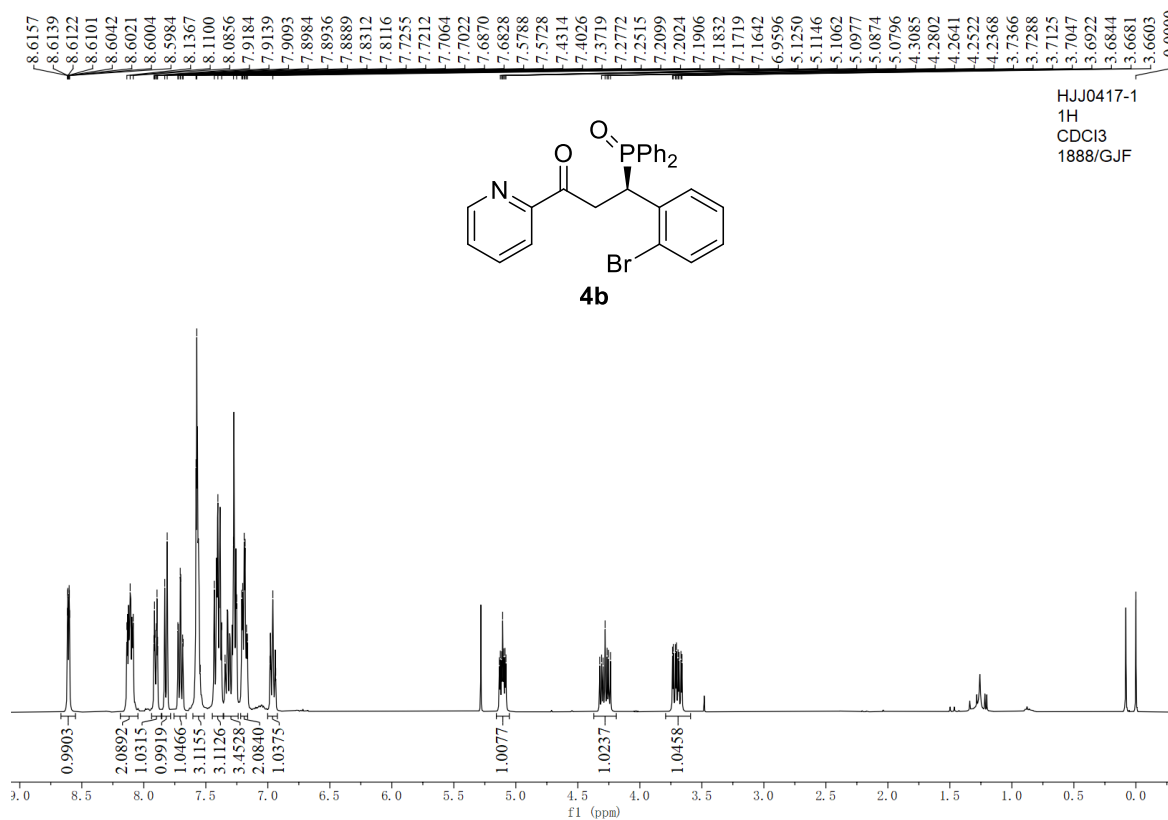

$^1\text{H}$  NMR spectrum of **4b** (400 MHz,  $\text{CDCl}_3$ )

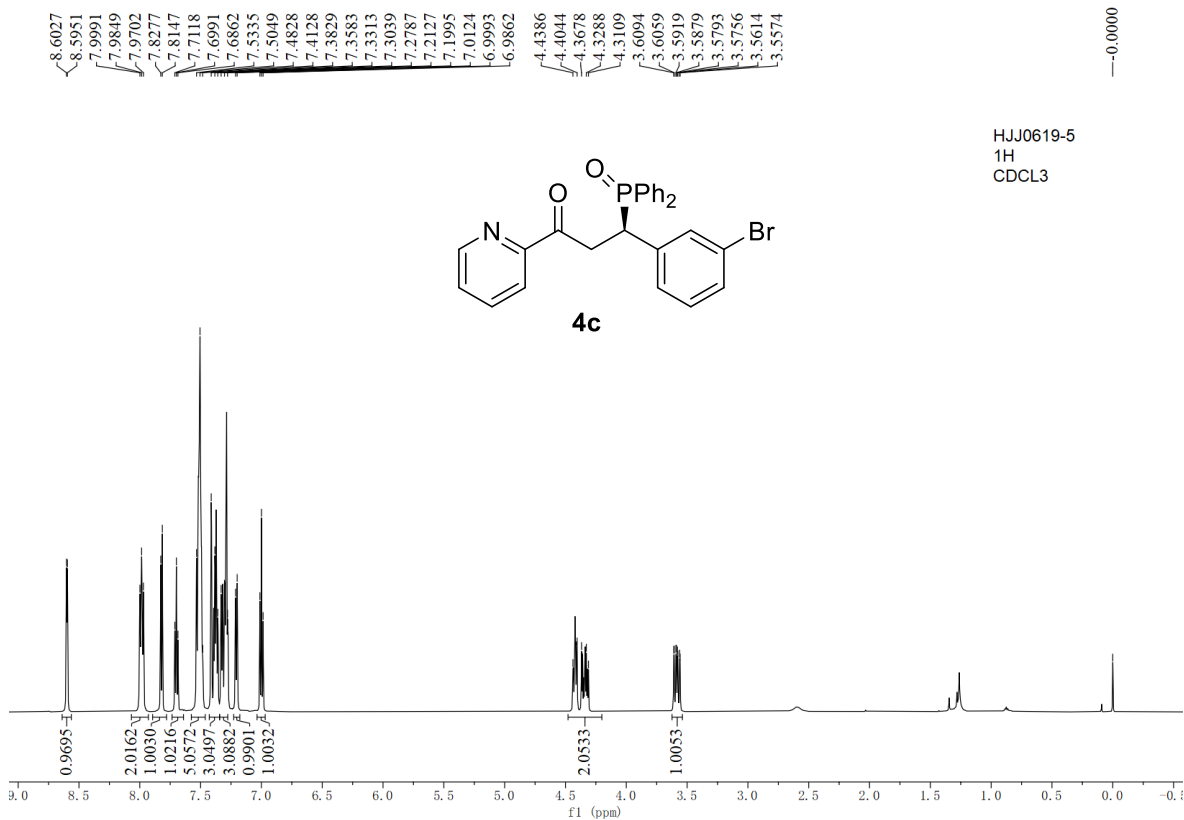

<sup>1</sup>H NMR spectrum of **4c** (600 MHz, CDCl<sub>3</sub>)

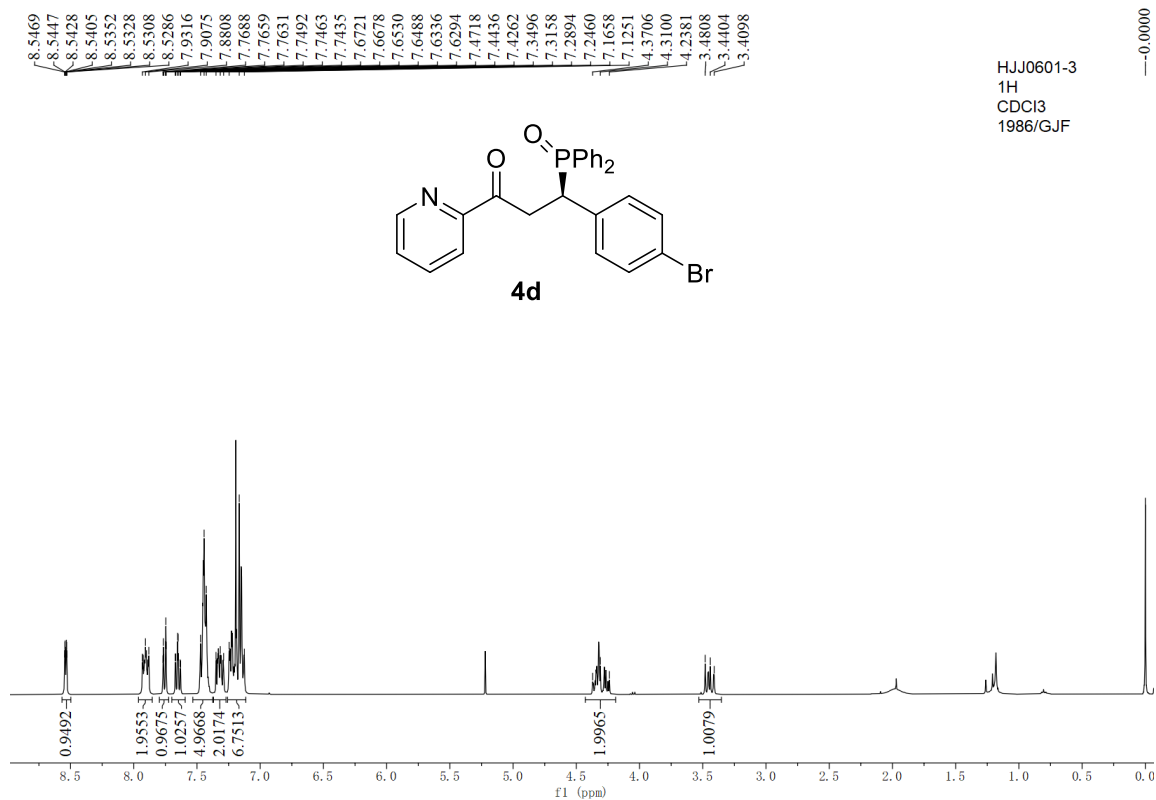

<sup>1</sup>H NMR spectrum of **4d** (400 MHz, CDCl<sub>3</sub>)

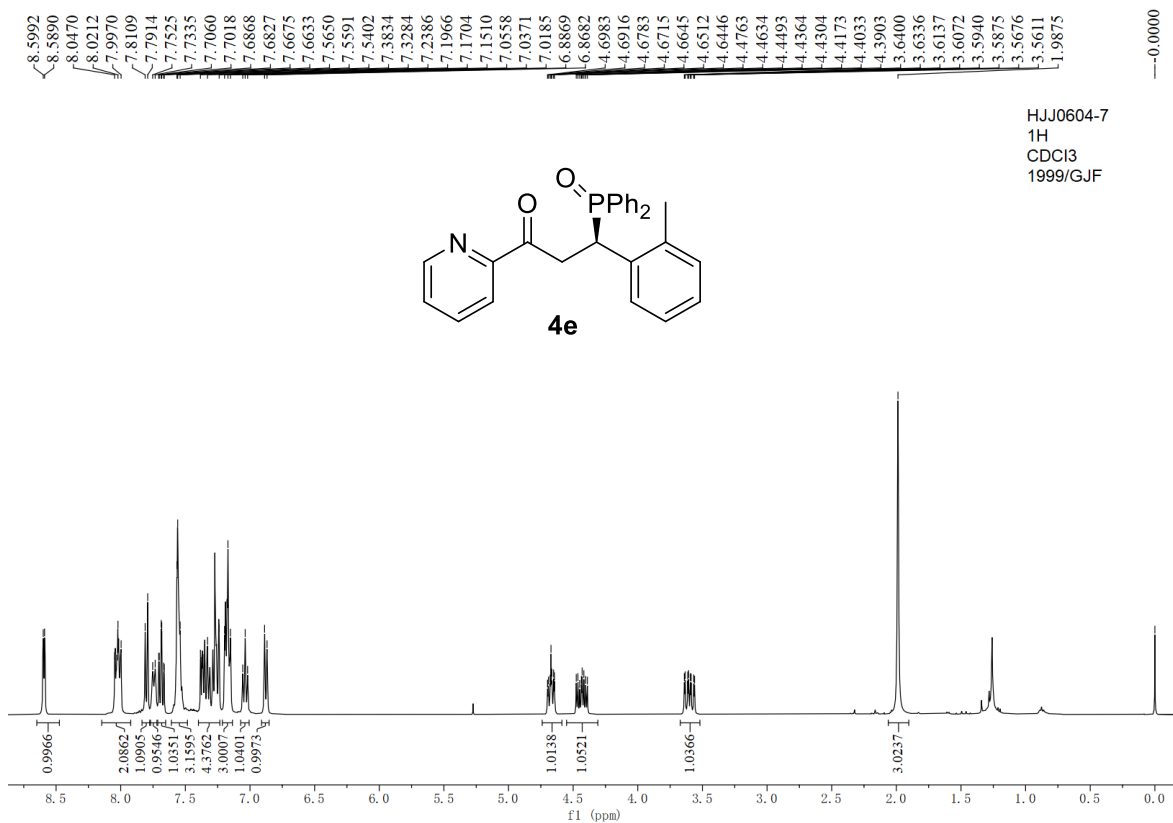

<sup>1</sup>H NMR spectrum of **4e** (400 MHz, CDCl<sub>3</sub>)

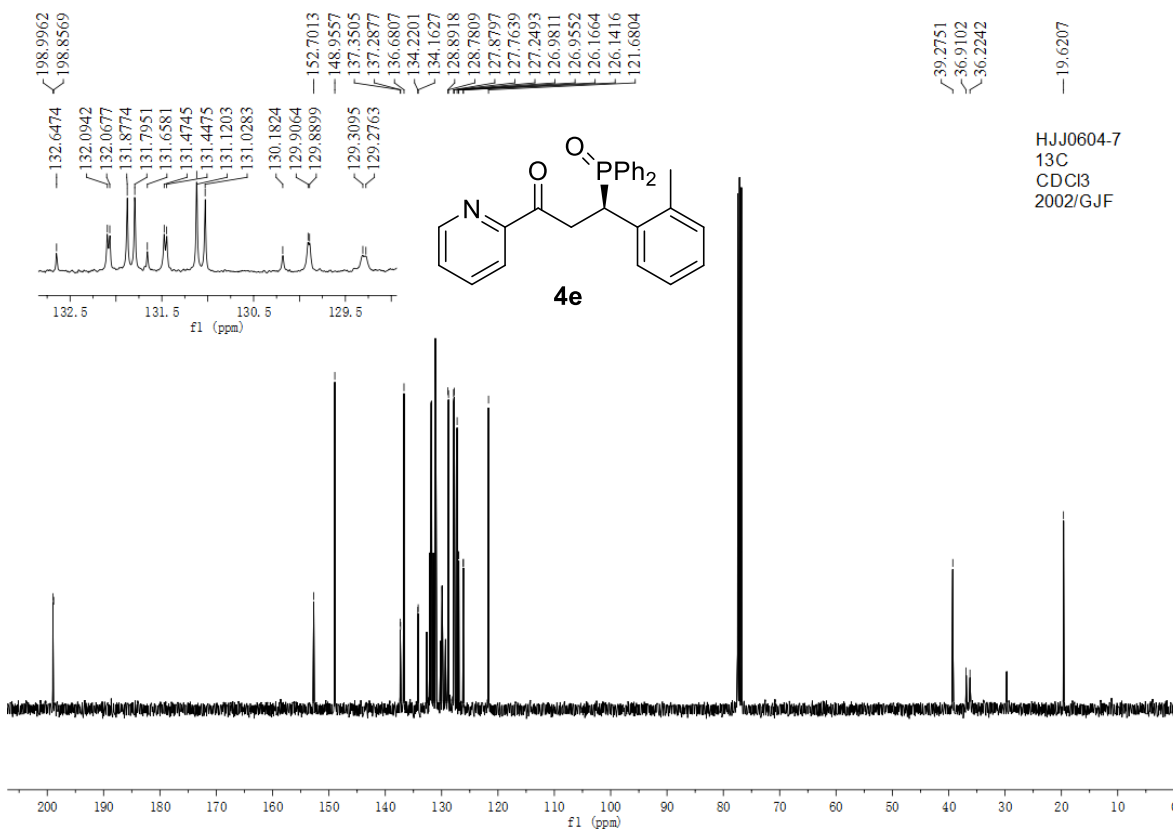

<sup>13</sup>C {<sup>1</sup>H} NMR spectrum of **4e** (100 MHz, CDCl<sub>3</sub>)

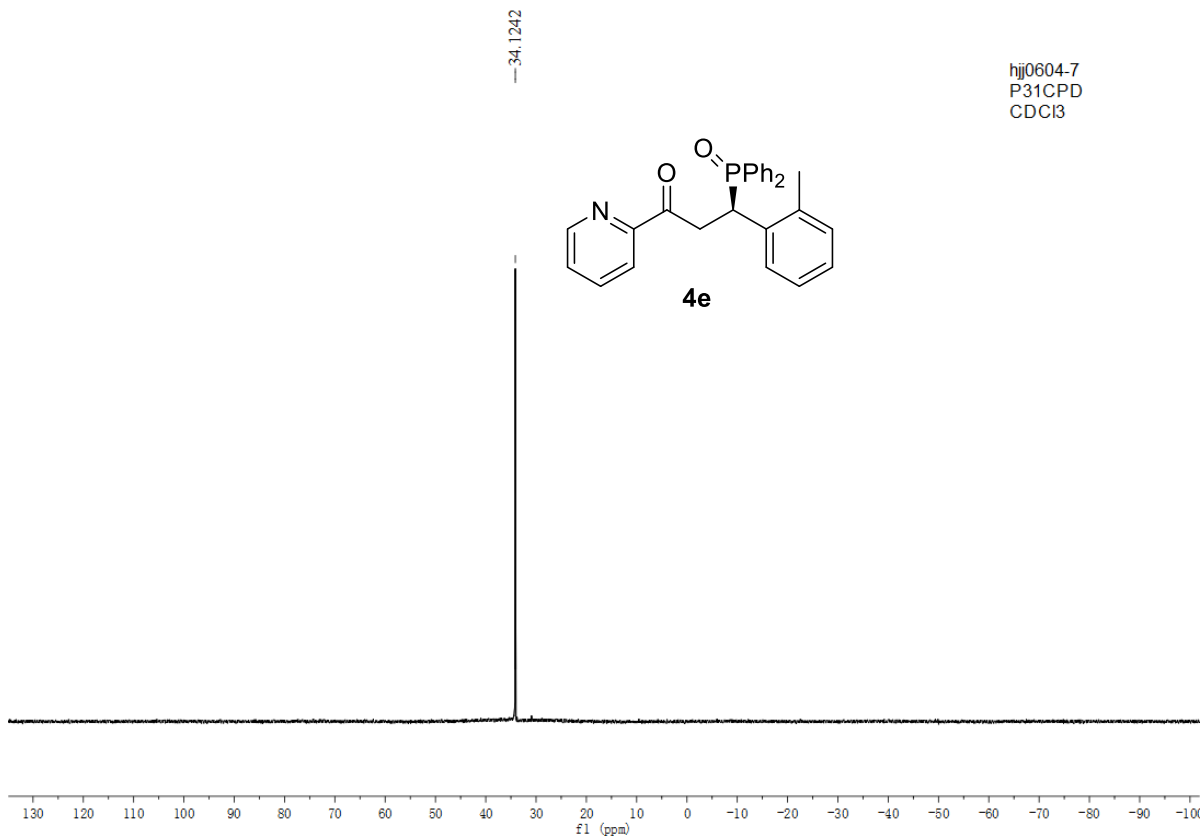

<sup>31</sup>P{<sup>1</sup>H} NMR spectrum of **4e** (162 MHz, CDCl<sub>3</sub>)

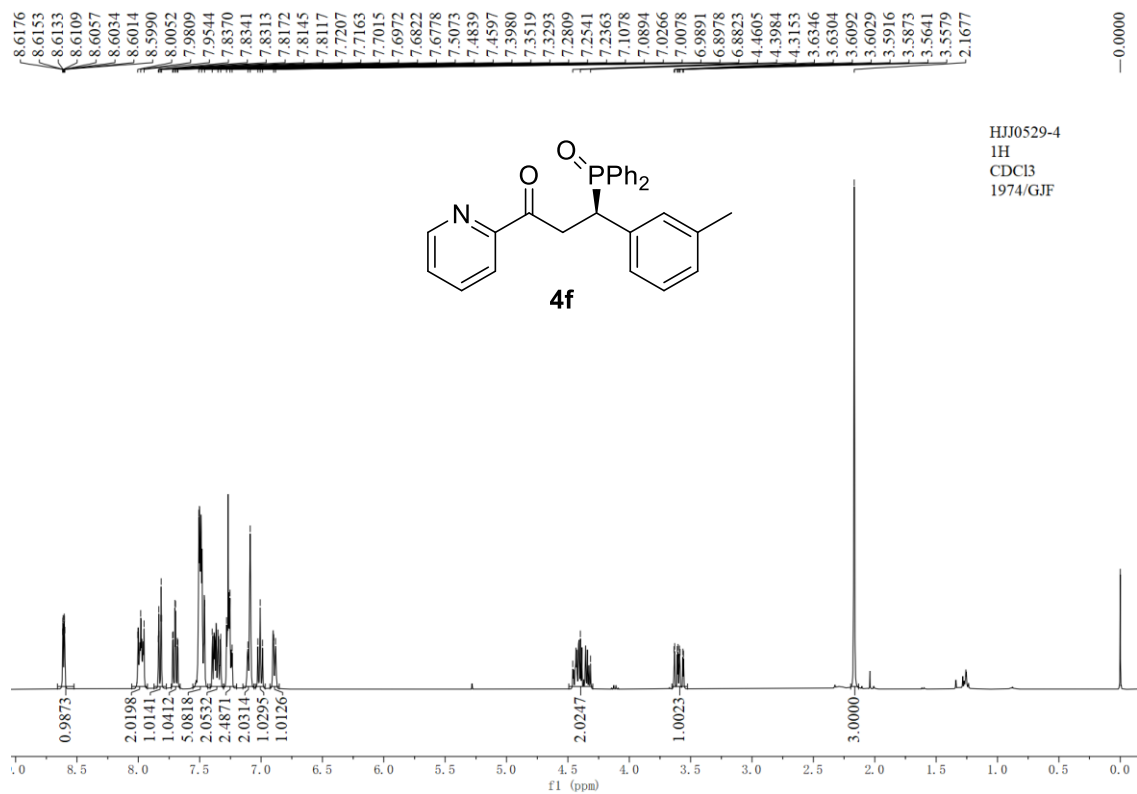

<sup>1</sup>H NMR spectrum of **4f** (400 MHz, CDCl<sub>3</sub>)

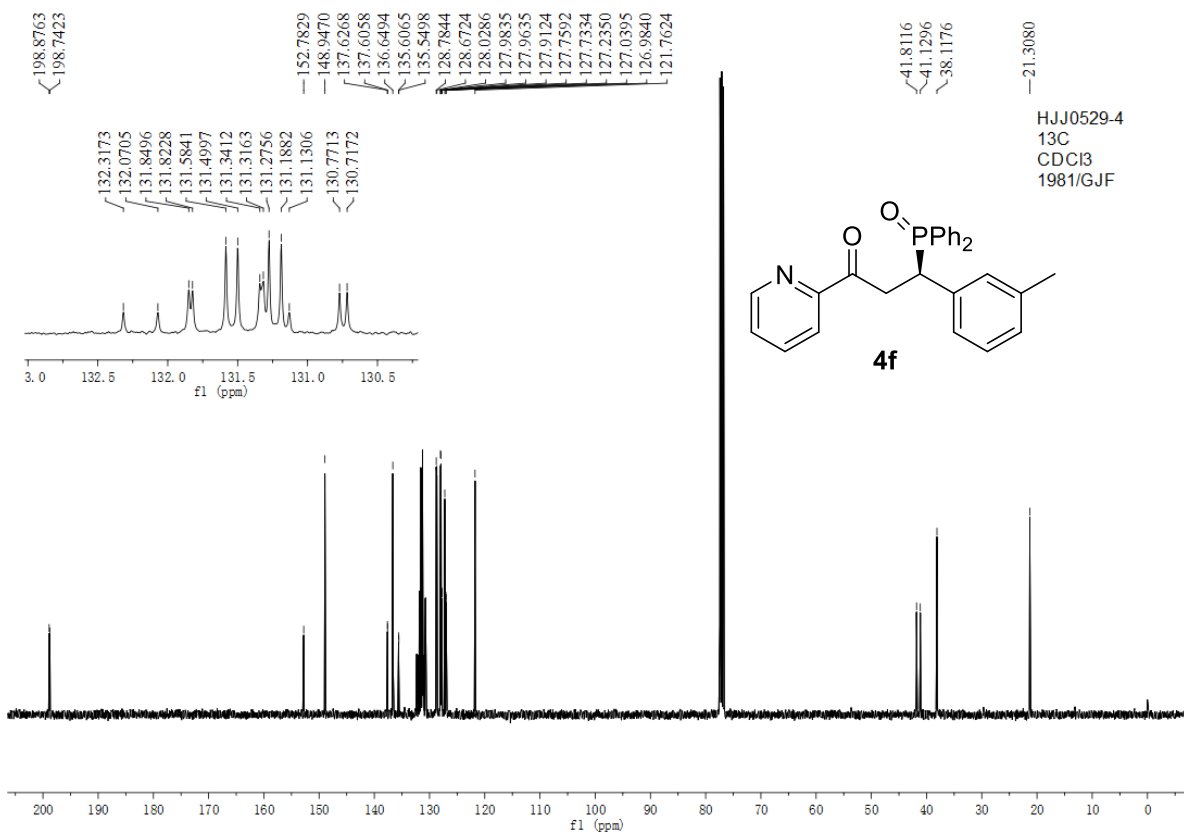

$^{13}\text{C}\{^1\text{H}\}$  NMR spectrum of **4f** (100 MHz,  $\text{CDCl}_3$ )

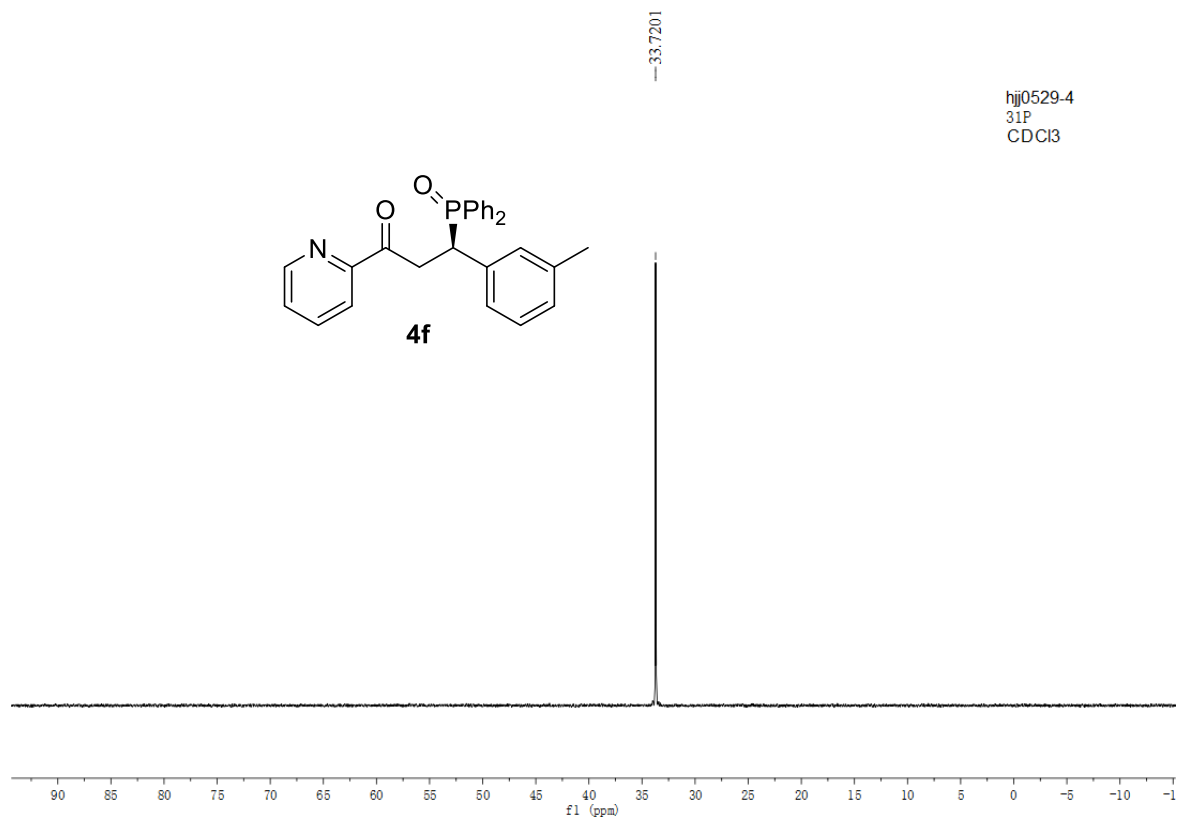

$^{31}\text{P}\{^1\text{H}\}$  NMR spectrum of **4f** (162 MHz,  $\text{CDCl}_3$ )



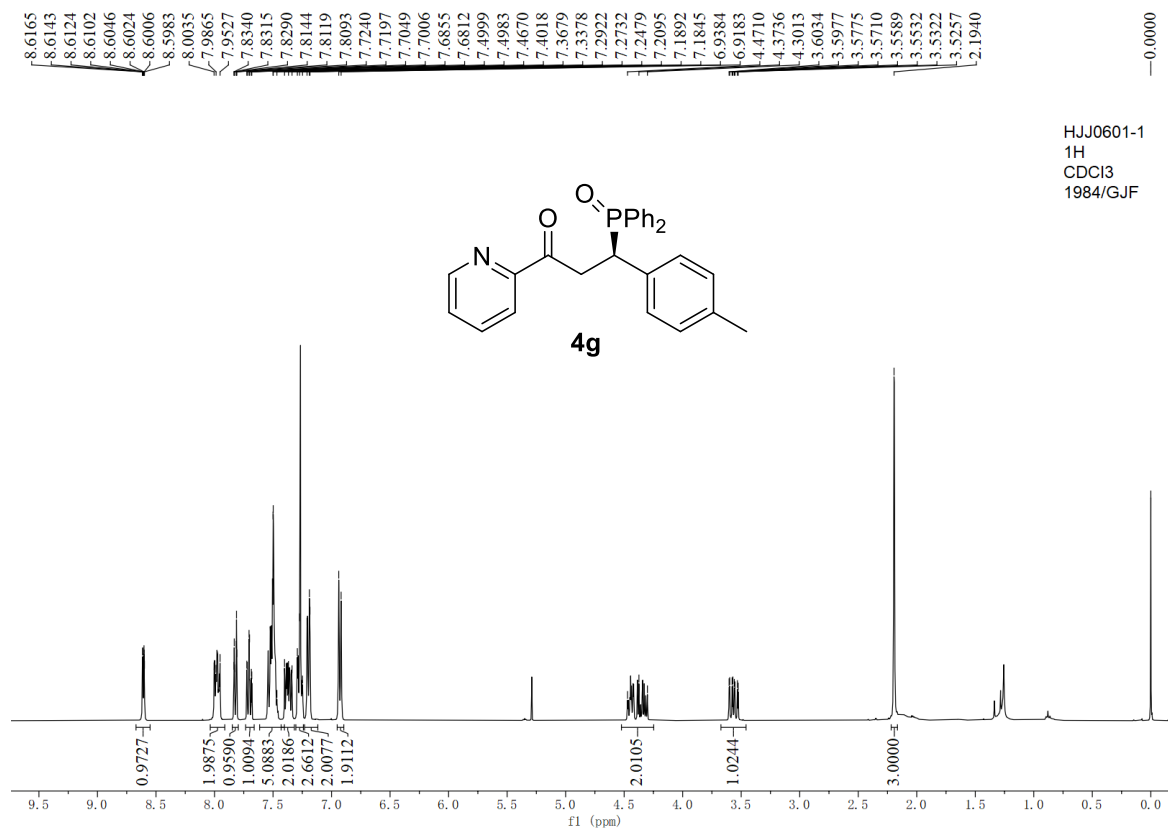

<sup>1</sup>H NMR spectrum of **4g** (400 MHz, CDCl<sub>3</sub>)

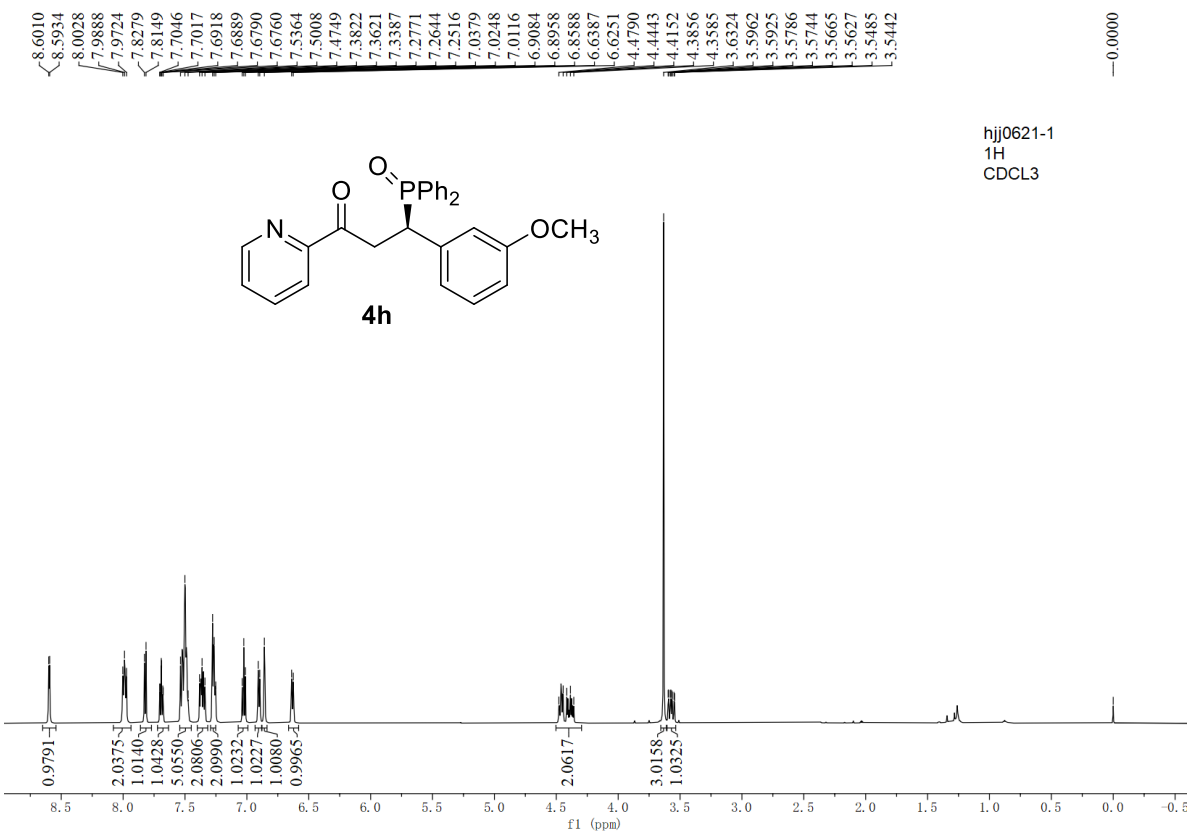

<sup>1</sup>H NMR spectrum of **4h** (600 MHz, CDCl<sub>3</sub>)

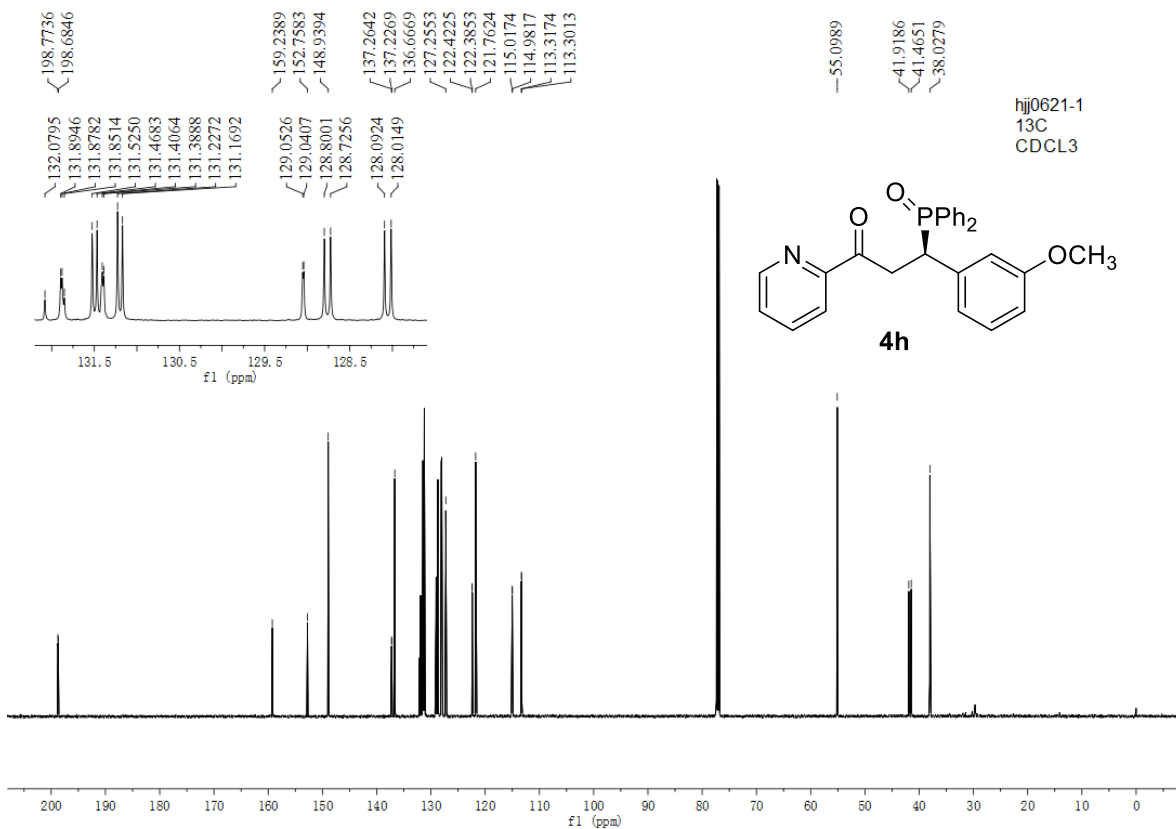

$^{13}\text{C}\{^1\text{H}\}$  NMR spectrum of **4h** (150 MHz,  $\text{CDCl}_3$ )

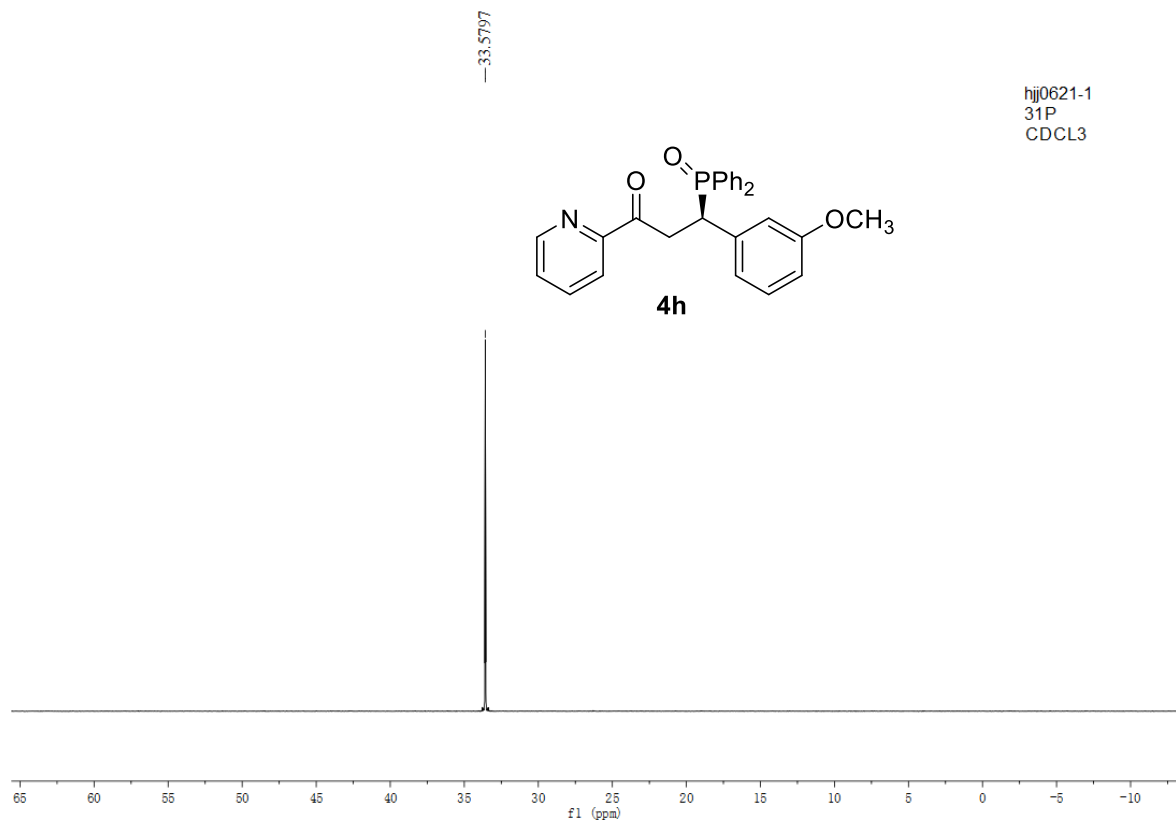

$^{31}\text{P}\{^1\text{H}\}$  NMR spectrum of **4h** (243 MHz,  $\text{CDCl}_3$ )

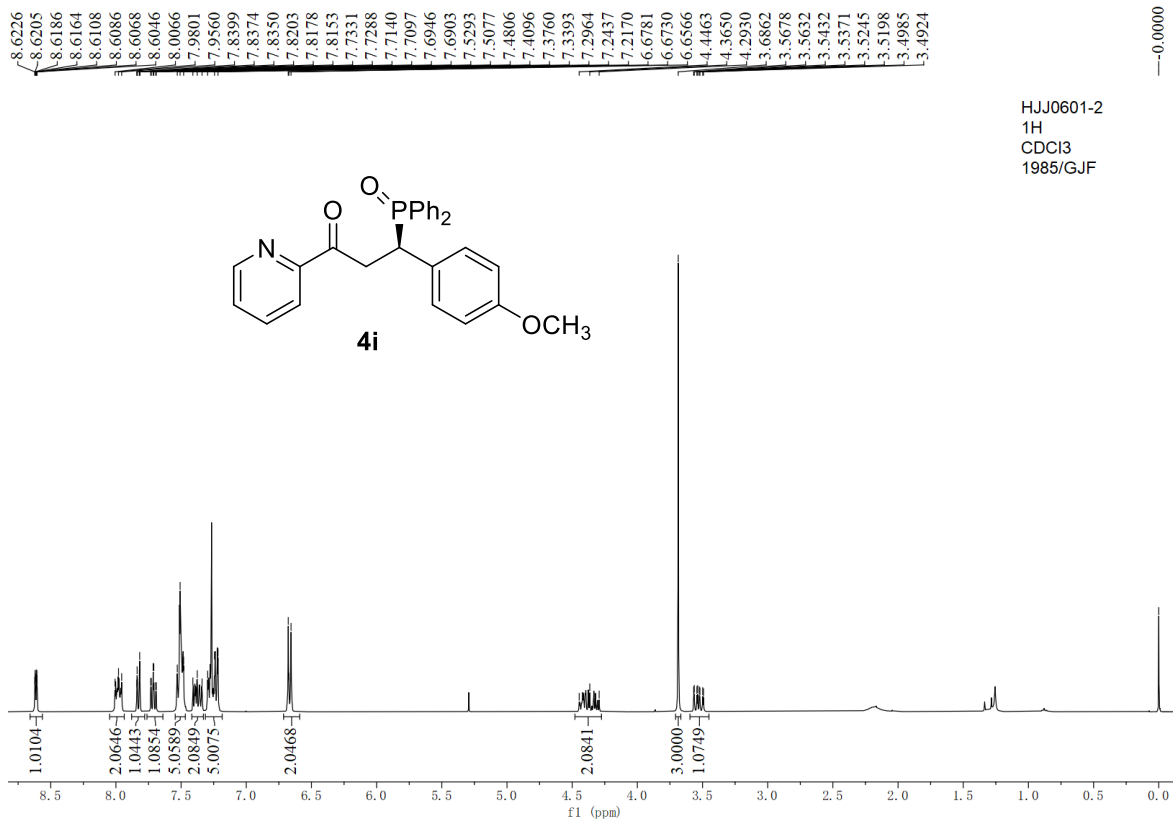

HJJ0601-2  
1H  
CDCl<sub>3</sub>  
1985/GJF

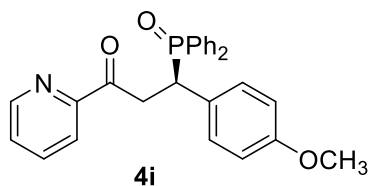

<sup>1</sup>H NMR spectrum of **4i** (600 MHz, CDCl<sub>3</sub>)

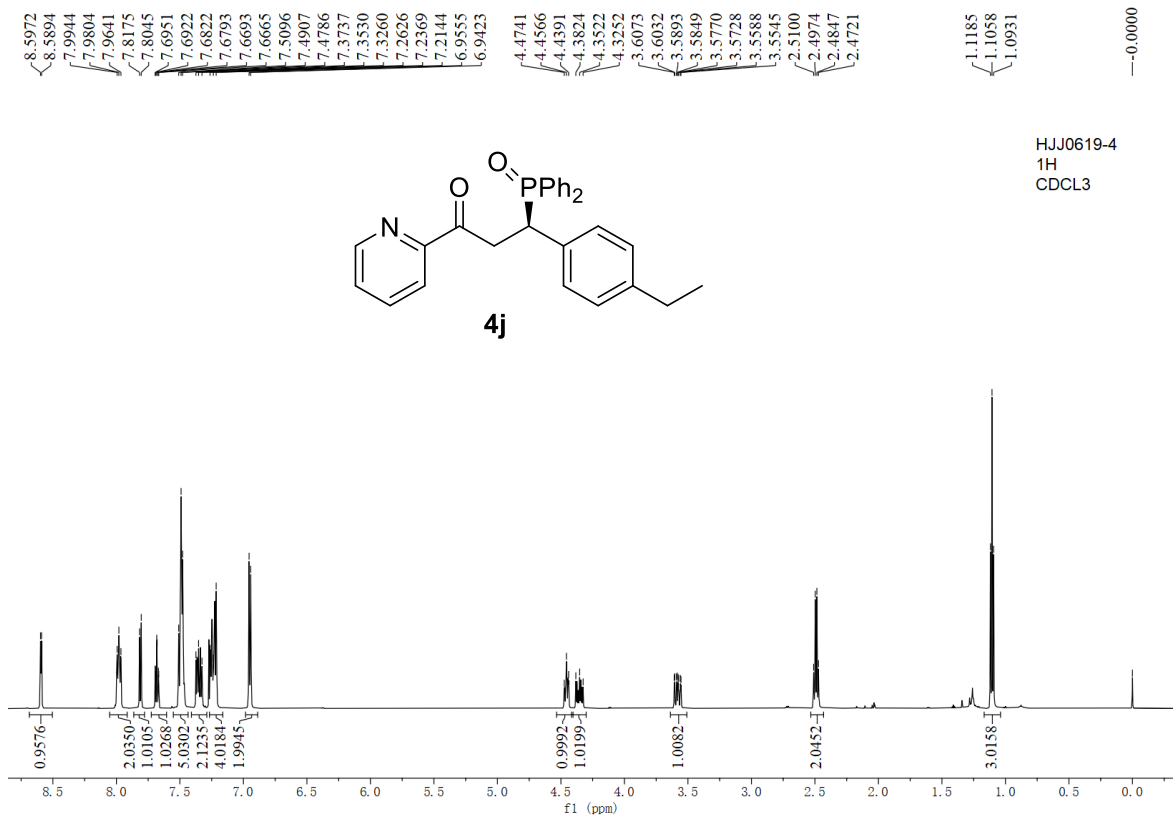

HJJ0619-4  
1H  
CDCl<sub>3</sub>

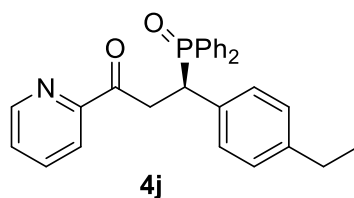

<sup>1</sup>H NMR spectrum of **4j** (600 MHz, CDCl<sub>3</sub>)

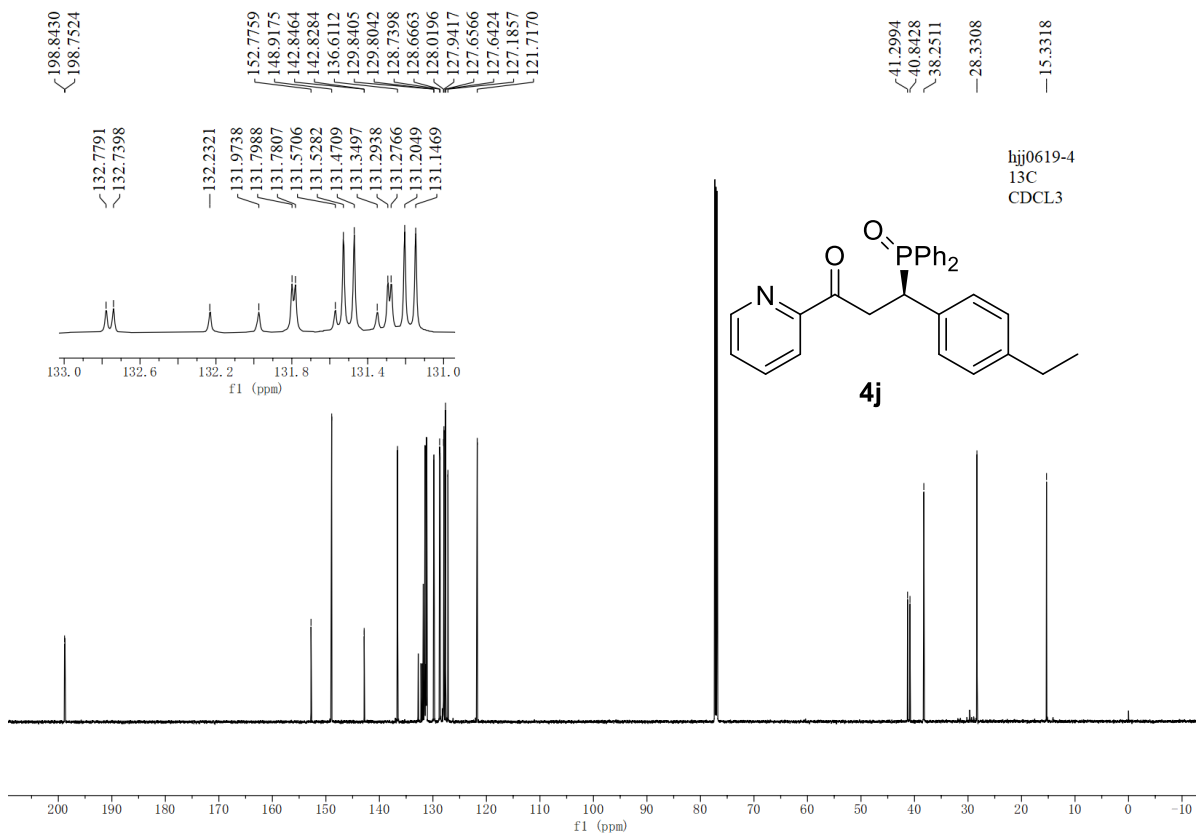

$^{13}\text{C}\{^1\text{H}\}$  NMR spectrum of **4j** (150 MHz,  $\text{CDCl}_3$ )

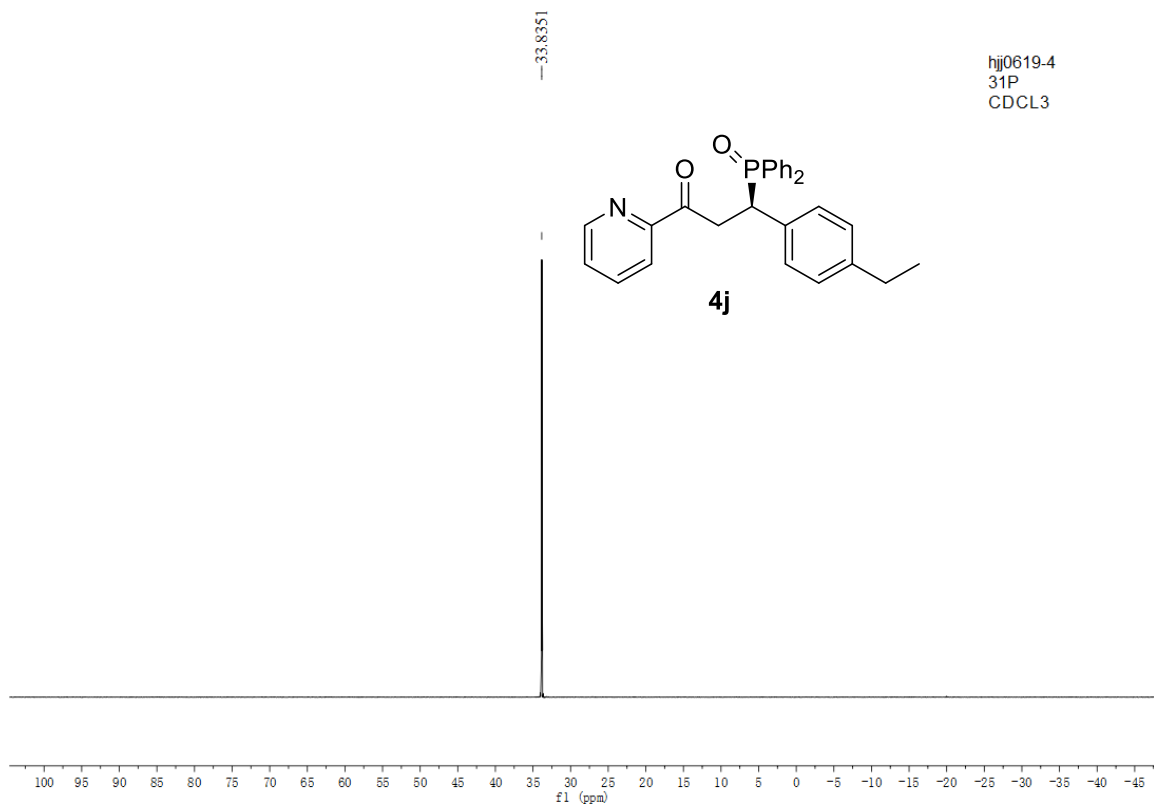

$^{31}\text{P}\{^1\text{H}\}$  NMR spectrum of **4j** (243 MHz,  $\text{CDCl}_3$ )

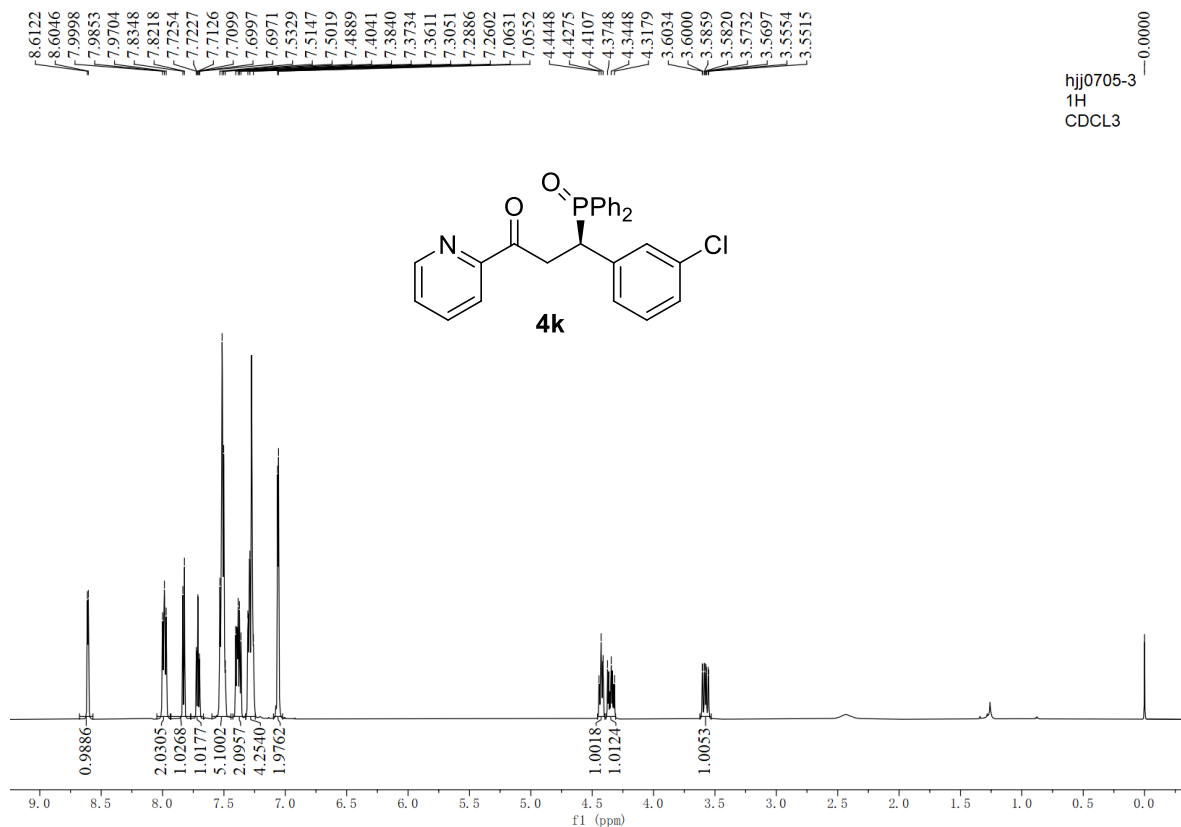

<sup>1</sup>H NMR spectrum of **4k** (600 MHz, CDCl<sub>3</sub>)

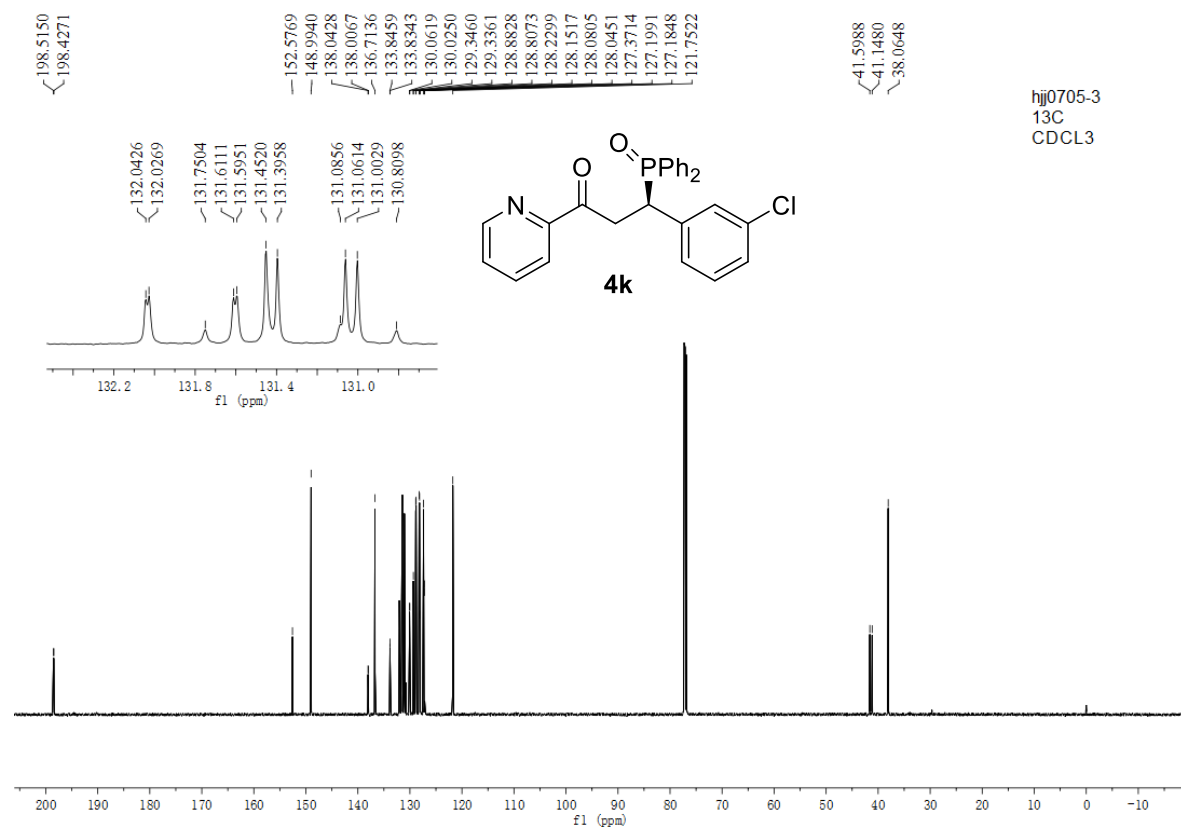

<sup>13</sup>C{<sup>1</sup>H} NMR spectrum of **4k** (150 MHz, CDCl<sub>3</sub>)

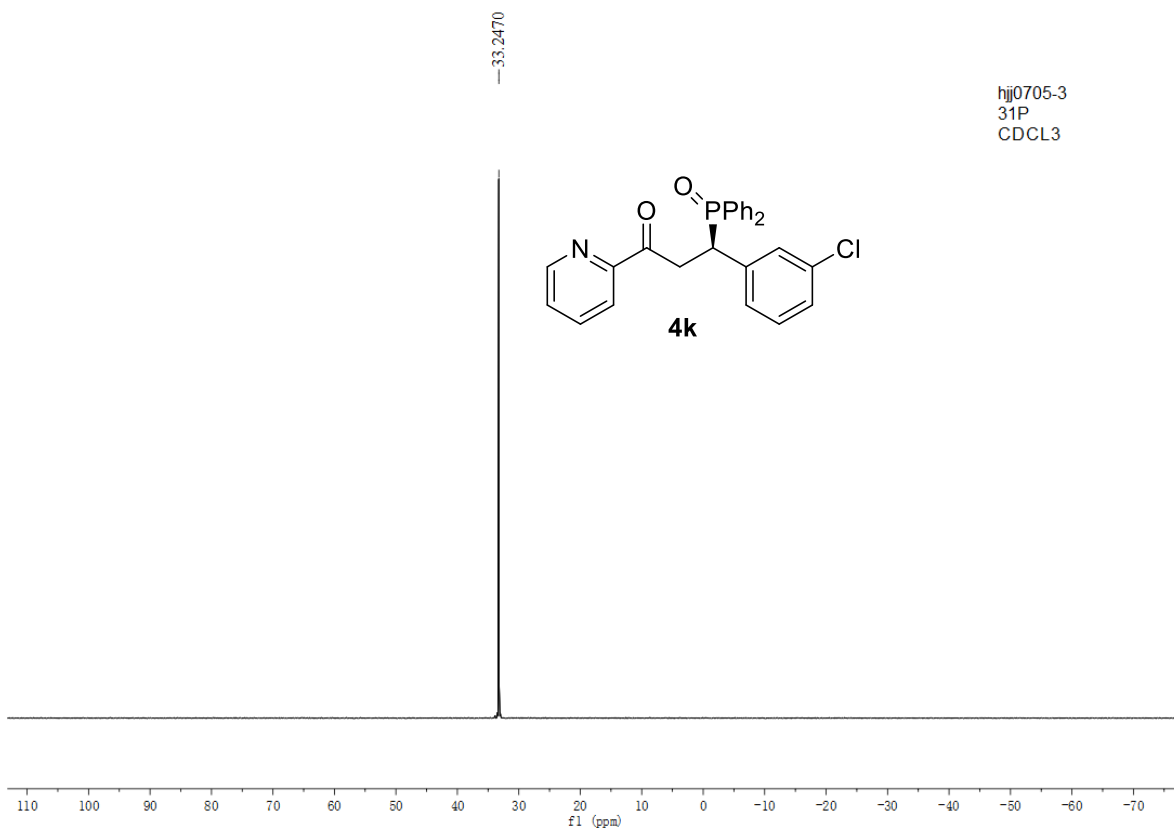

$^{31}\text{P}\{^1\text{H}\}$  NMR spectrum of **4k** (243 MHz,  $\text{CDCl}_3$ )

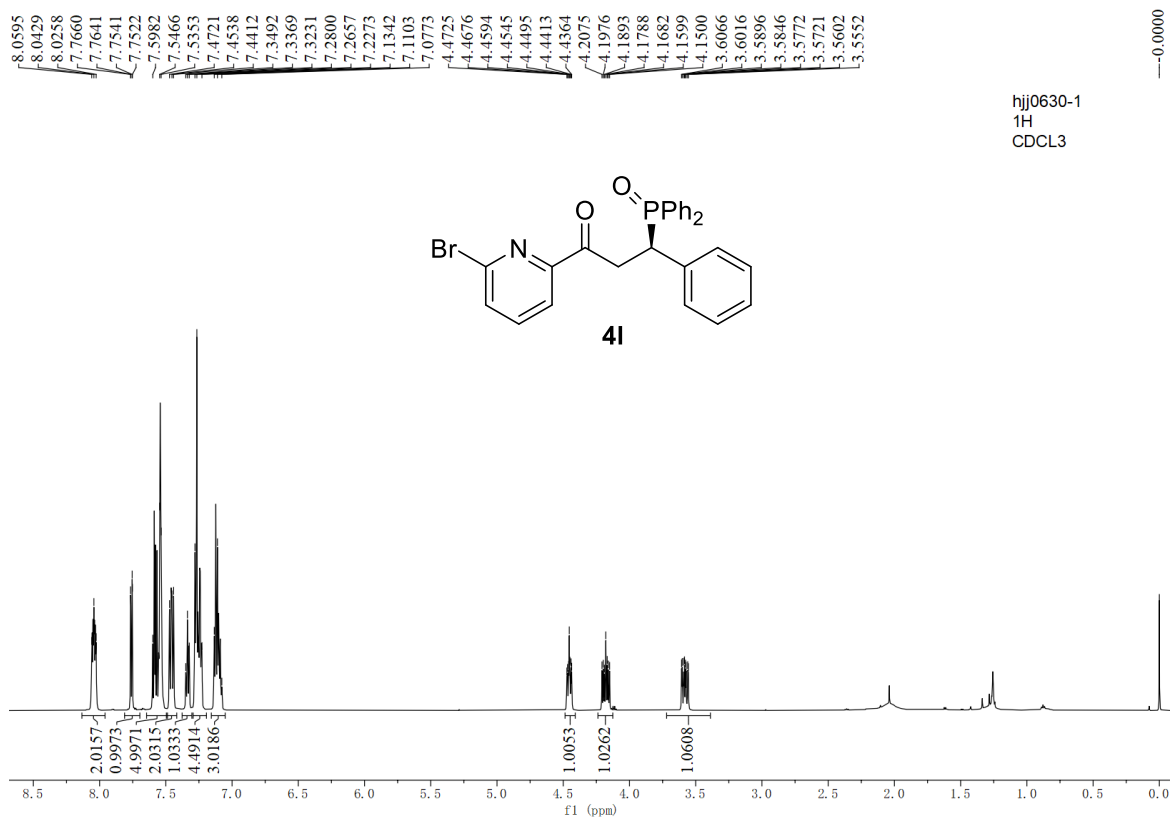

$^1\text{H}$  NMR spectrum of **4l** (600 MHz,  $\text{CDCl}_3$ )

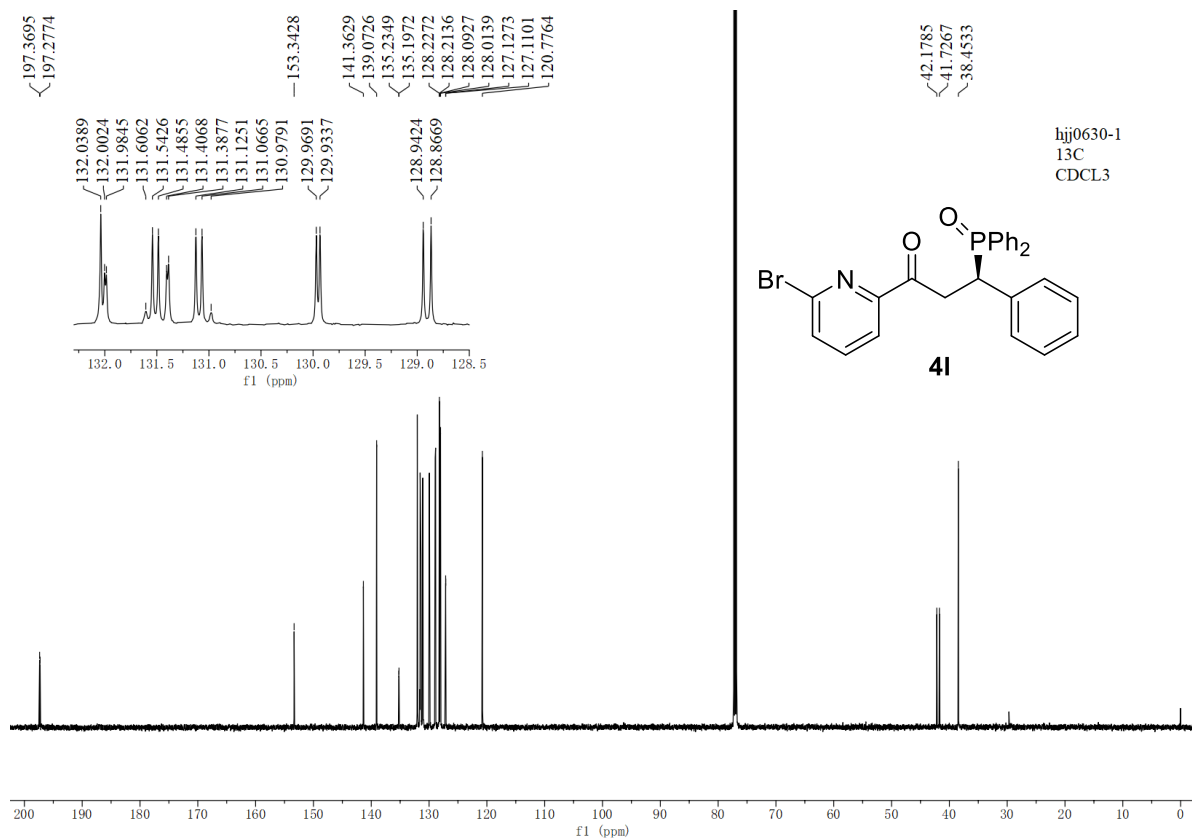

$^{13}\text{C}\{^1\text{H}\}$  NMR spectrum of **4I** (150 MHz,  $\text{CDCl}_3$ )

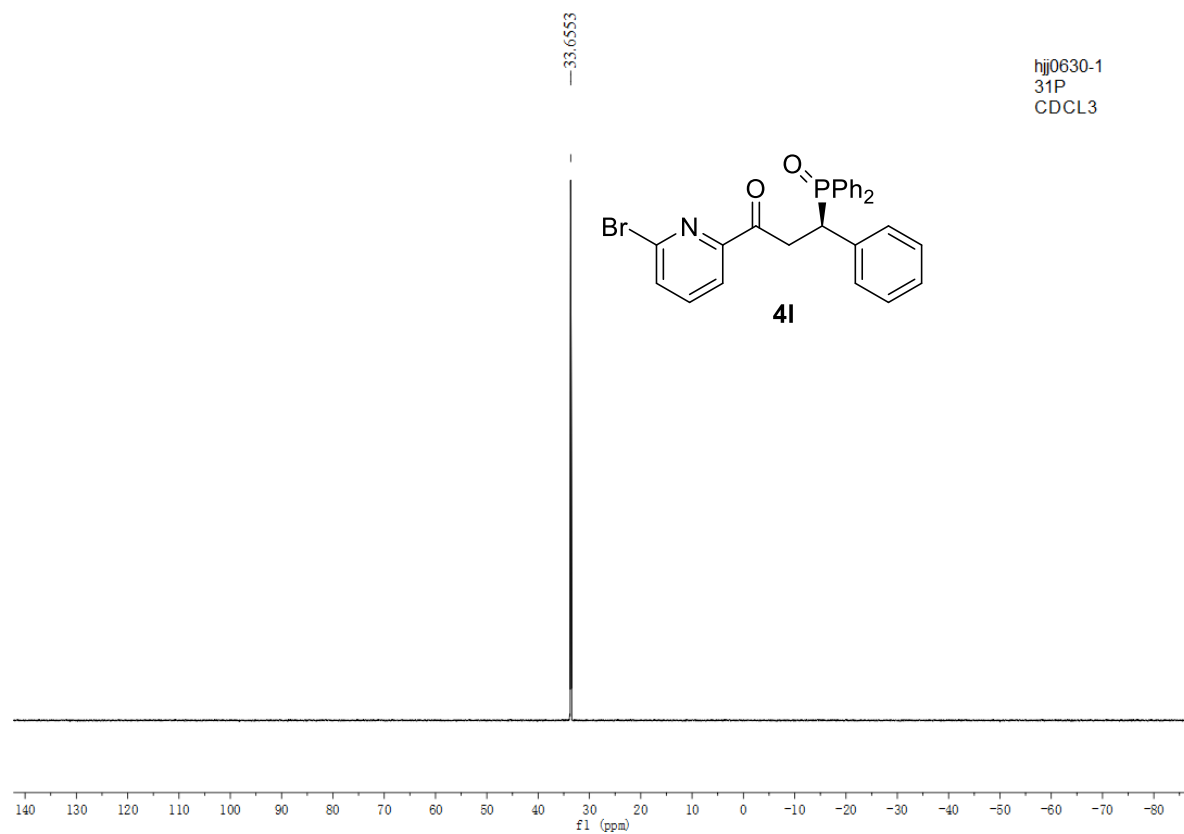

$^{31}\text{P}\{^1\text{H}\}$  NMR spectrum of **4I** (243 MHz,  $\text{CDCl}_3$ )

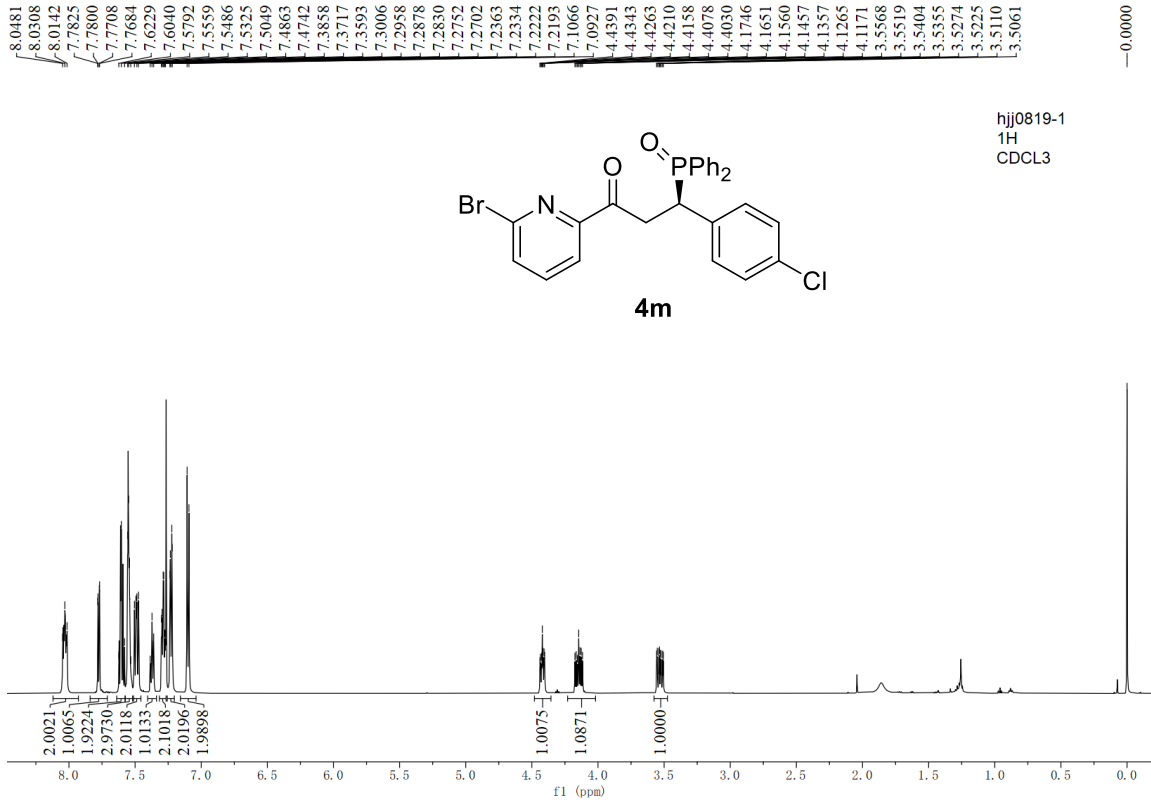

<sup>1</sup>H NMR spectrum of **4m** (600 MHz, CDCl<sub>3</sub>)

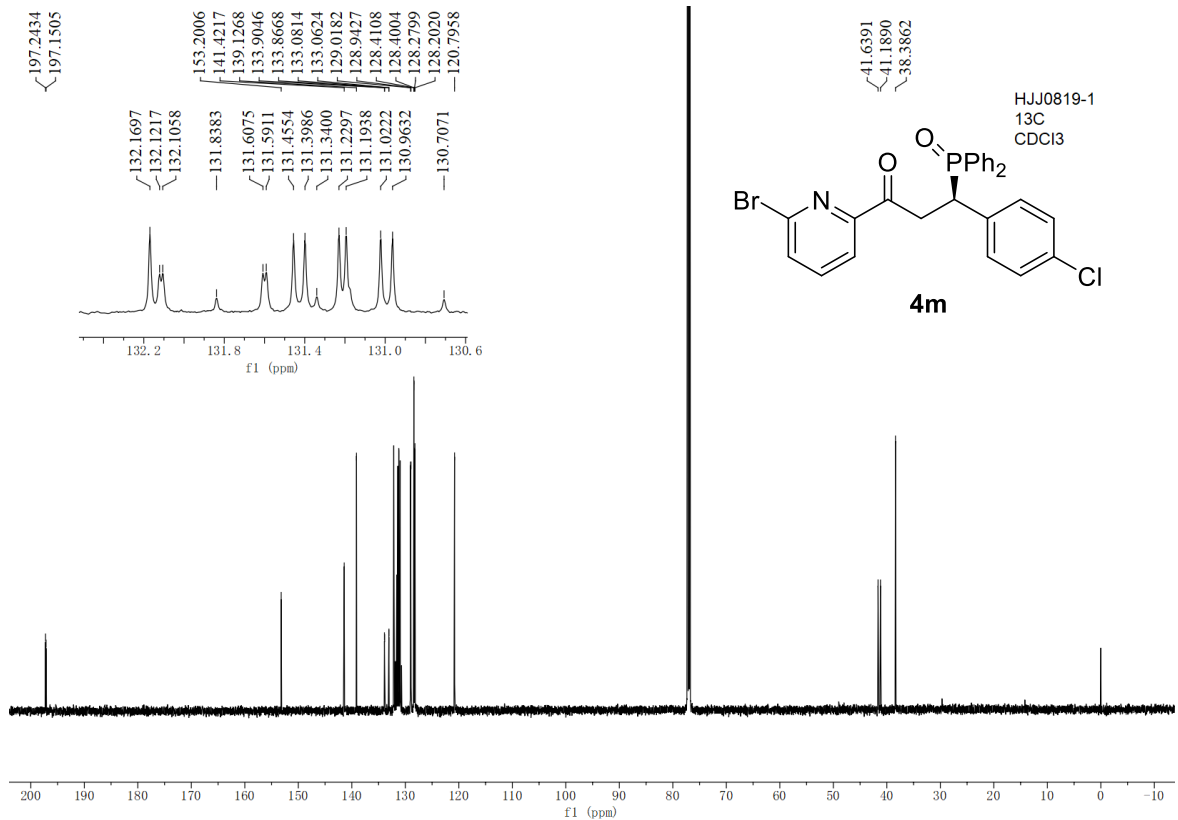

<sup>13</sup>C {<sup>1</sup>H} NMR spectrum of **4m** (150 MHz, CDCl<sub>3</sub>)



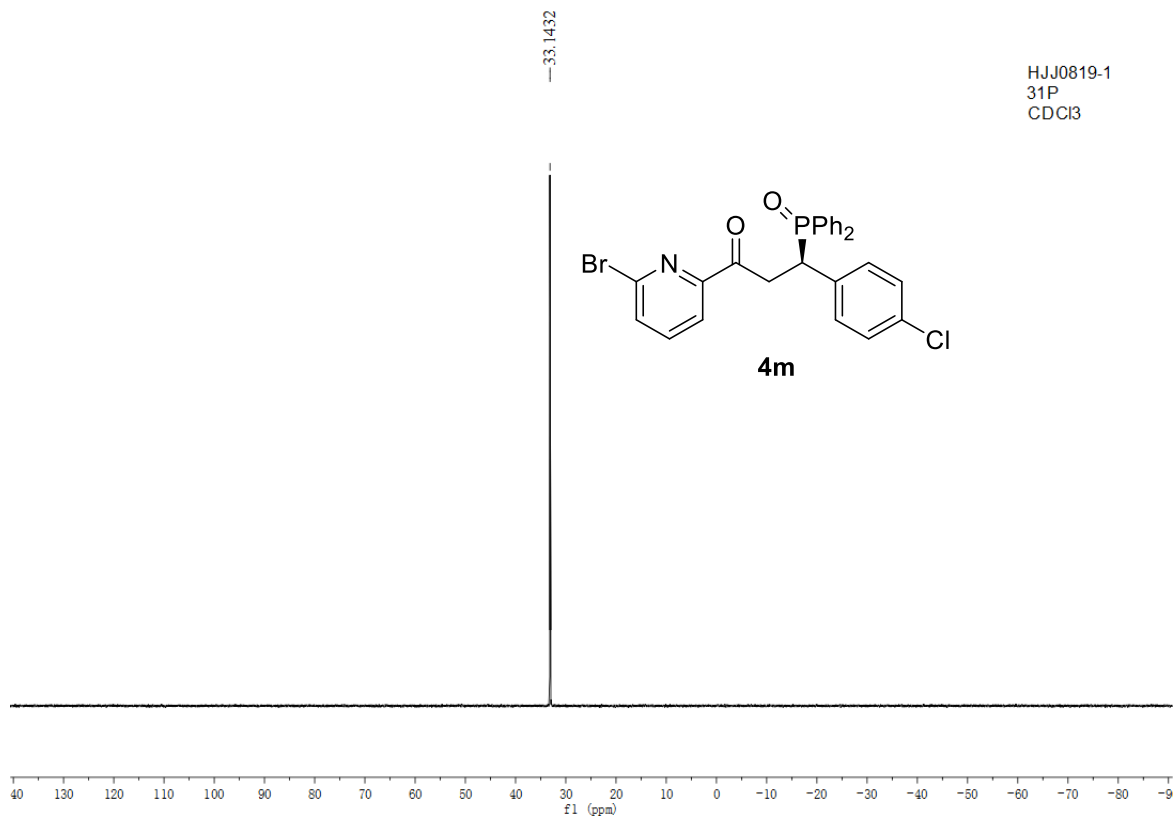

$^{31}\text{P}\{^1\text{H}\}$  NMR spectrum of **4m** (243 MHz,  $\text{CDCl}_3$ )

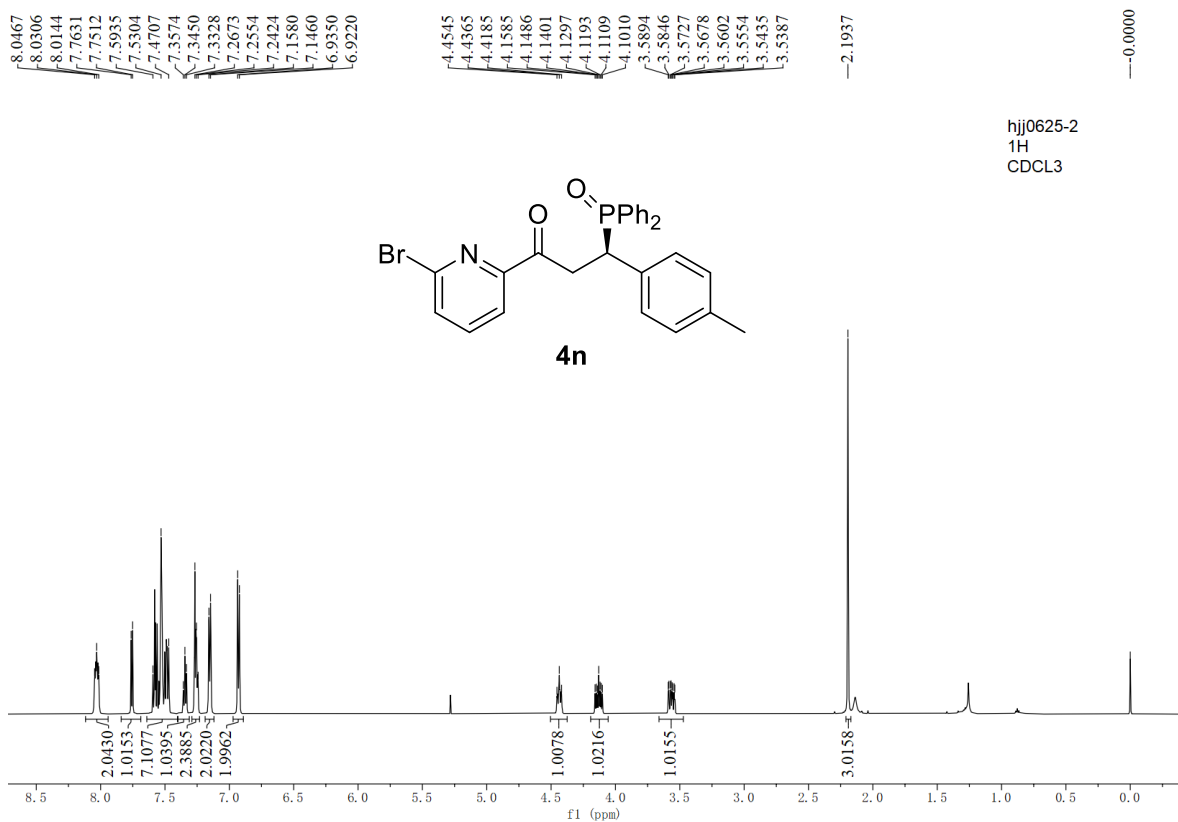

$^1\text{H}$  NMR spectrum of **4n** (600 MHz,  $\text{CDCl}_3$ )

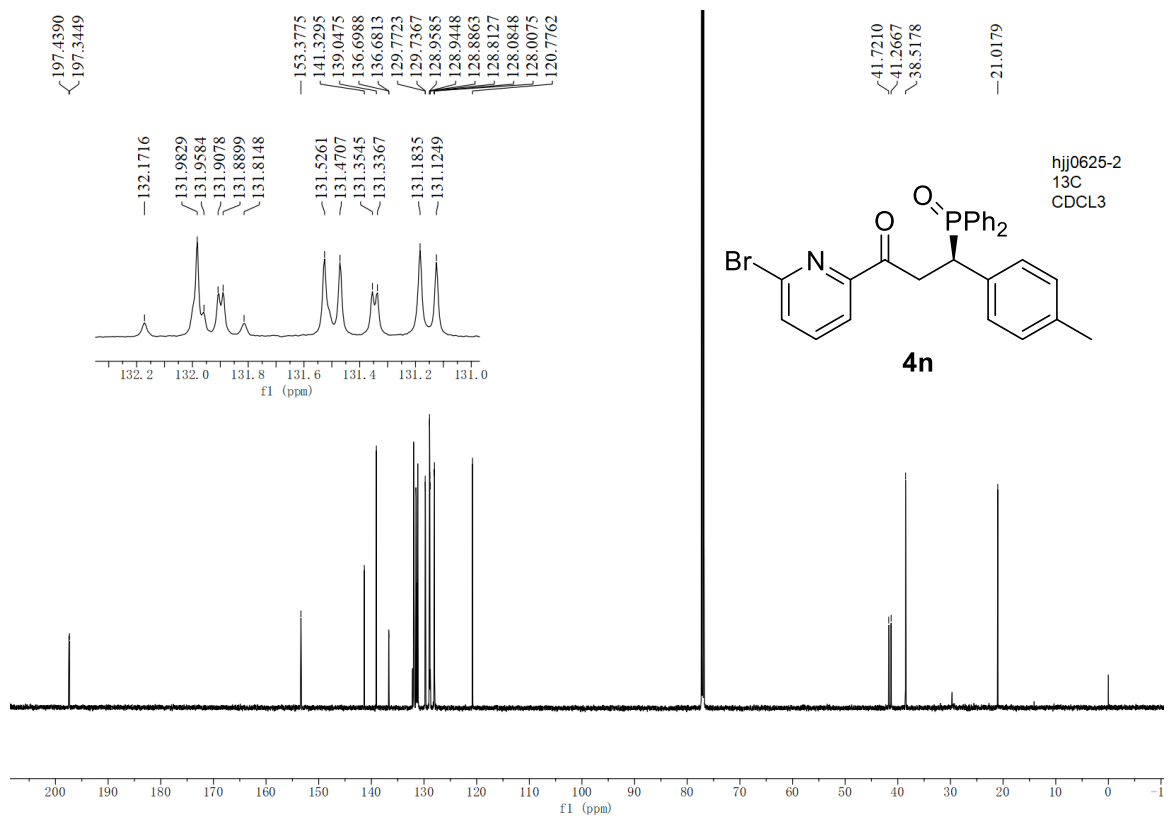

$^{13}\text{C}\{^1\text{H}\}$  NMR spectrum of **4n** (150 MHz,  $\text{CDCl}_3$ )

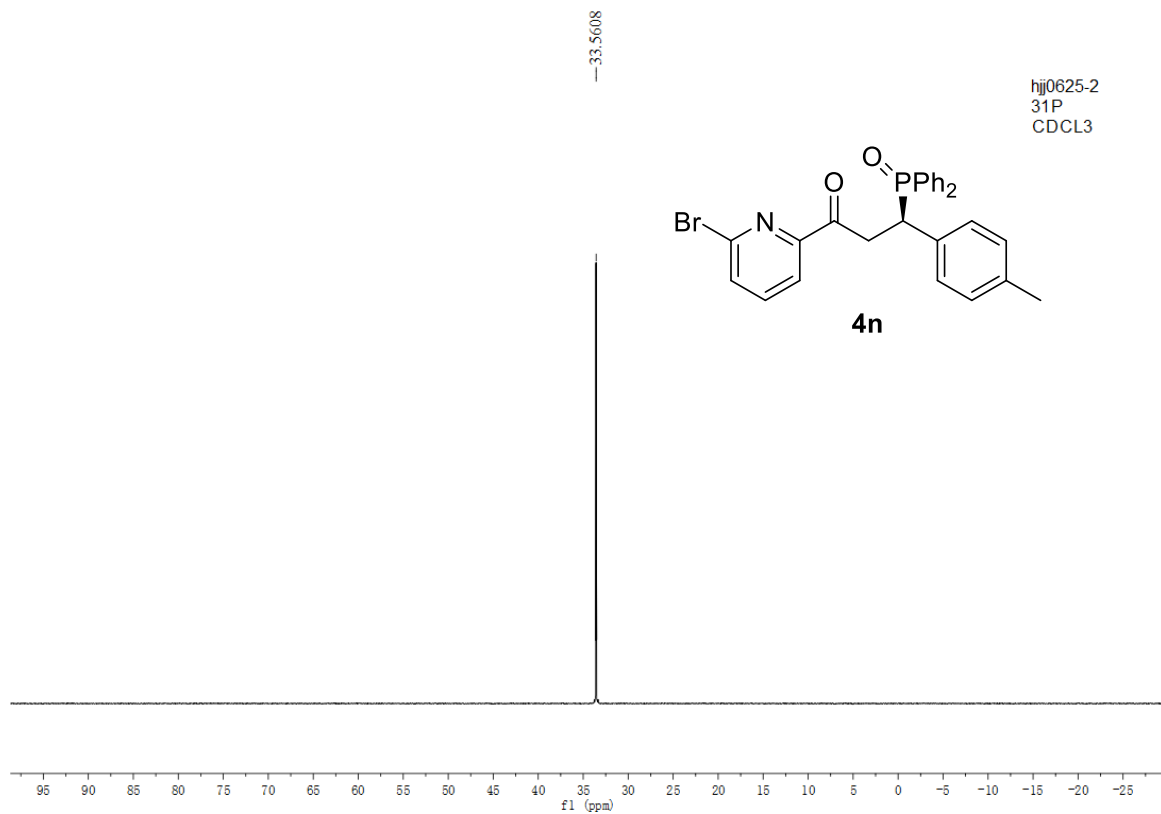

$^{31}\text{P}\{^1\text{H}\}$  NMR spectrum of **4n** (243 MHz,  $\text{CDCl}_3$ )

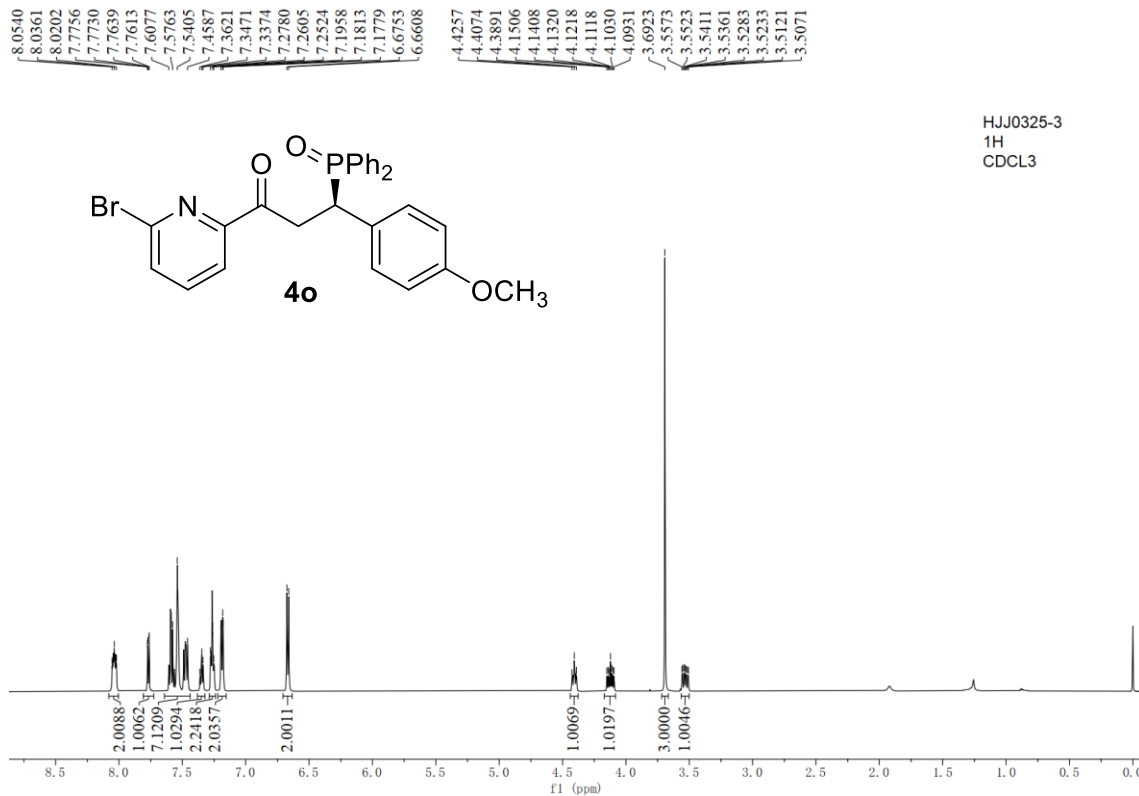

<sup>1</sup>H NMR spectrum of **4o** (600 MHz, CDCl<sub>3</sub>)

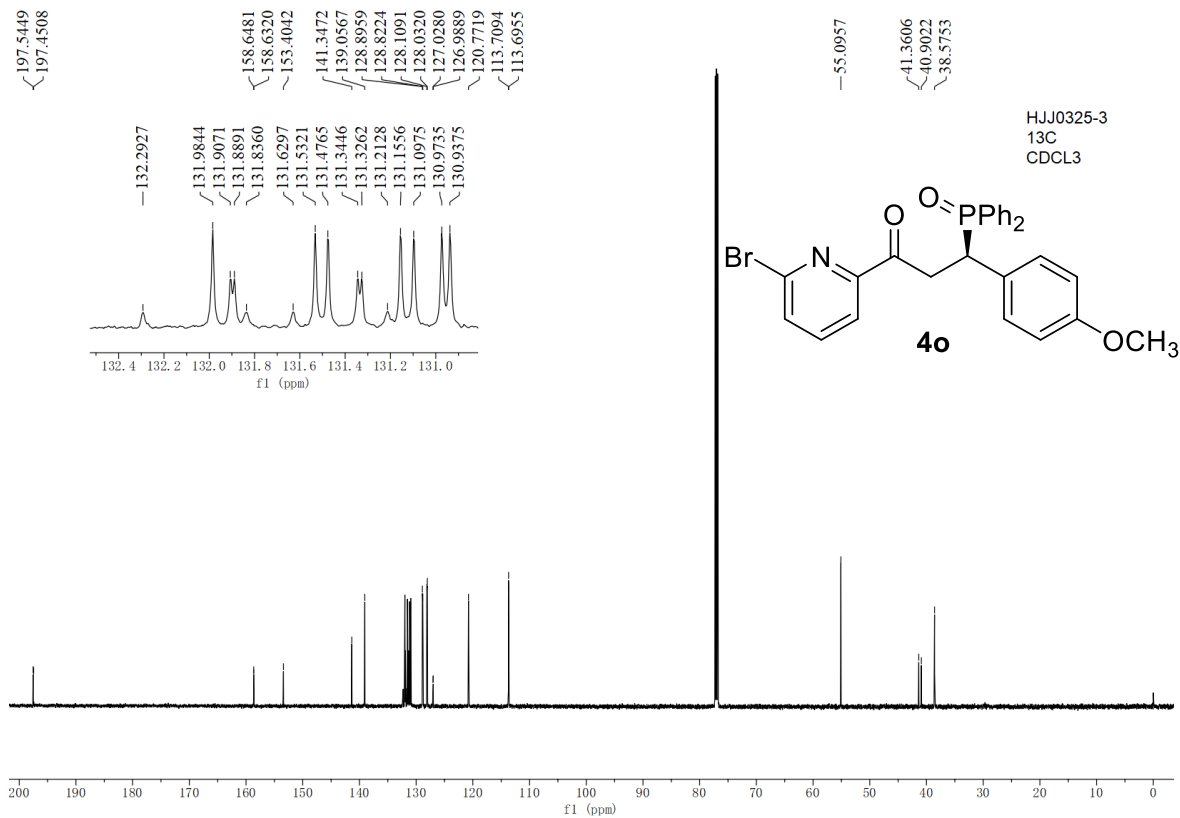

<sup>13</sup>C {<sup>1</sup>H} NMR spectrum of **4o** (150 MHz, CDCl<sub>3</sub>)

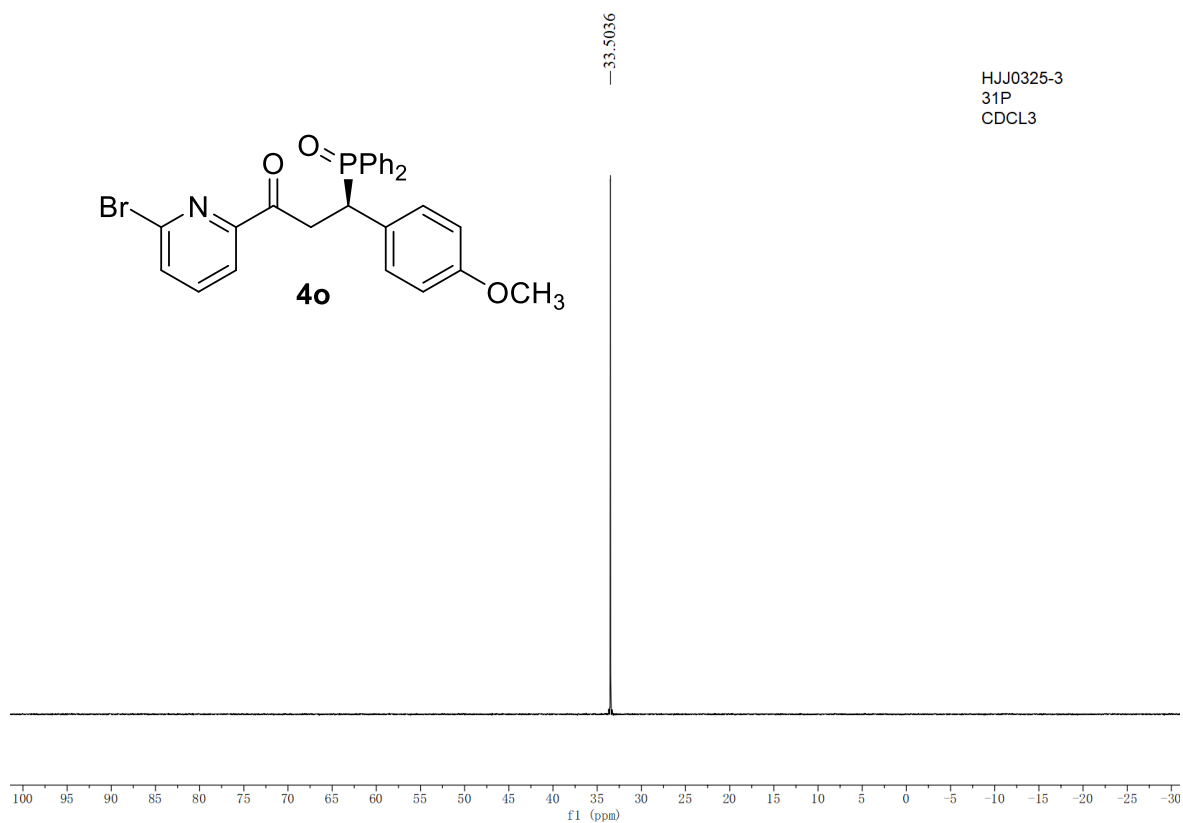

$^{31}\text{P}\{^1\text{H}\}$  NMR spectrum of **4o** (243 MHz,  $\text{CDCl}_3$ )

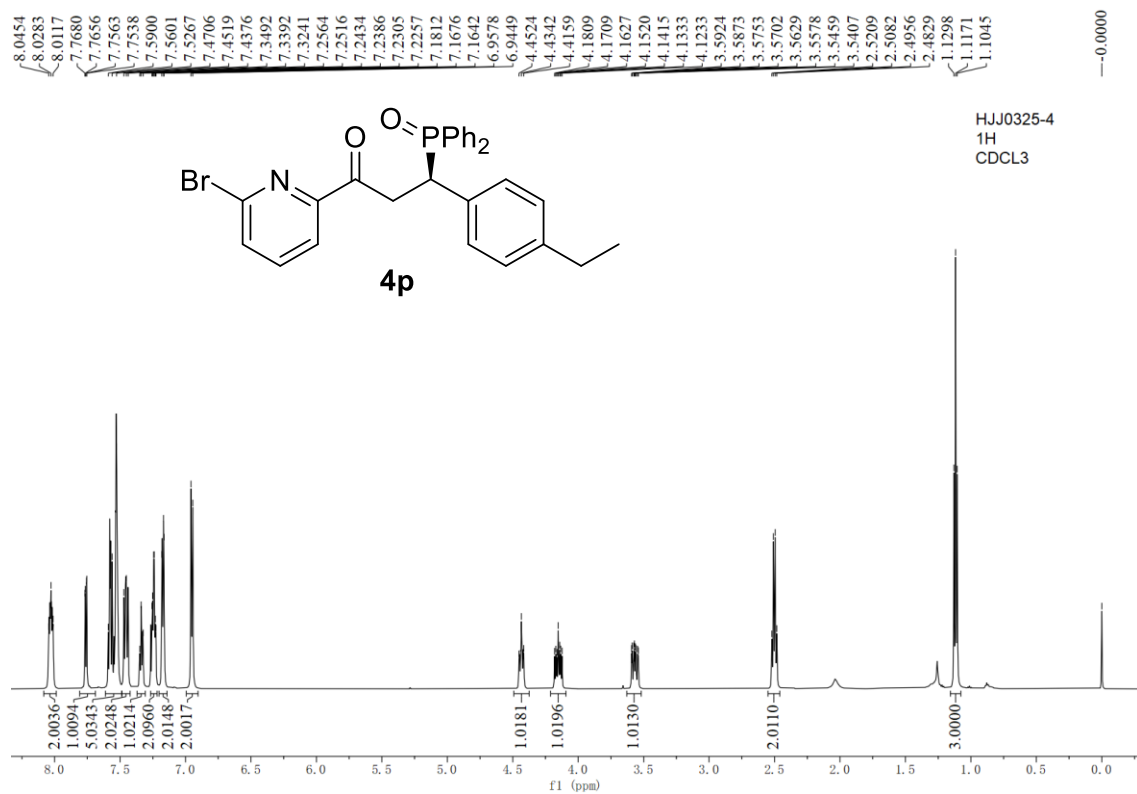

$^1\text{H}$  NMR spectrum of **4p** (600 MHz,  $\text{CDCl}_3$ )

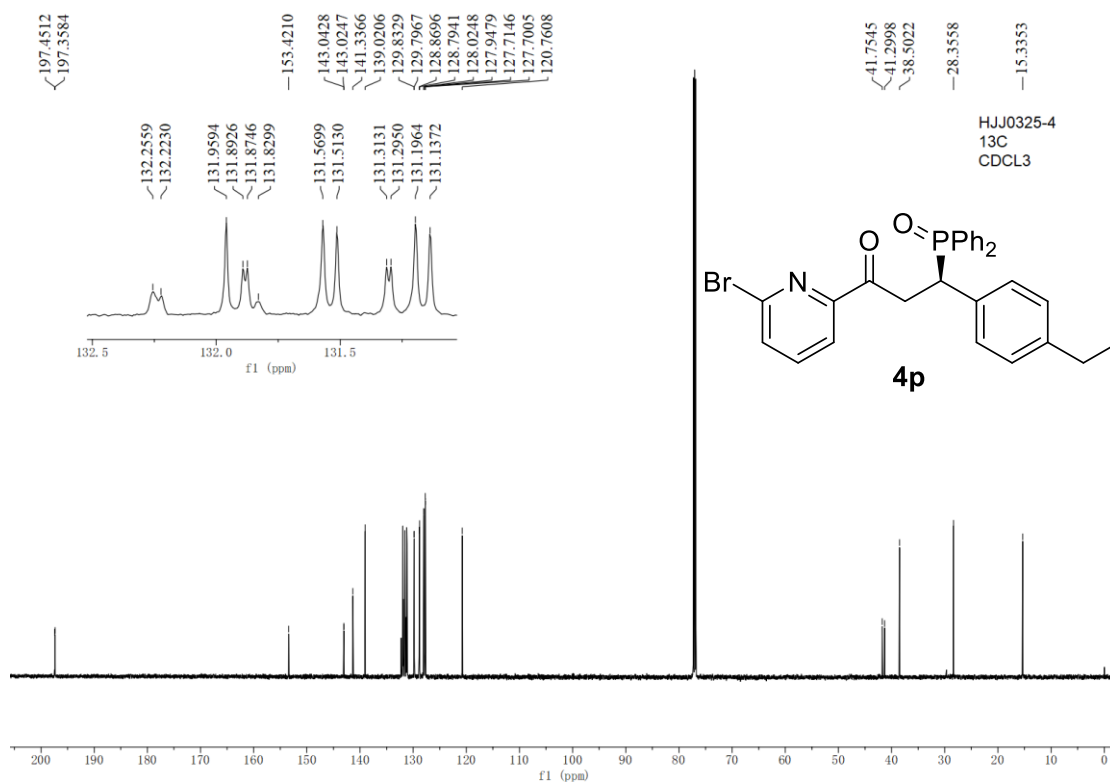

$^{13}\text{C}\{^1\text{H}\}$  NMR spectrum of **4p** (150 MHz,  $\text{CDCl}_3$ )

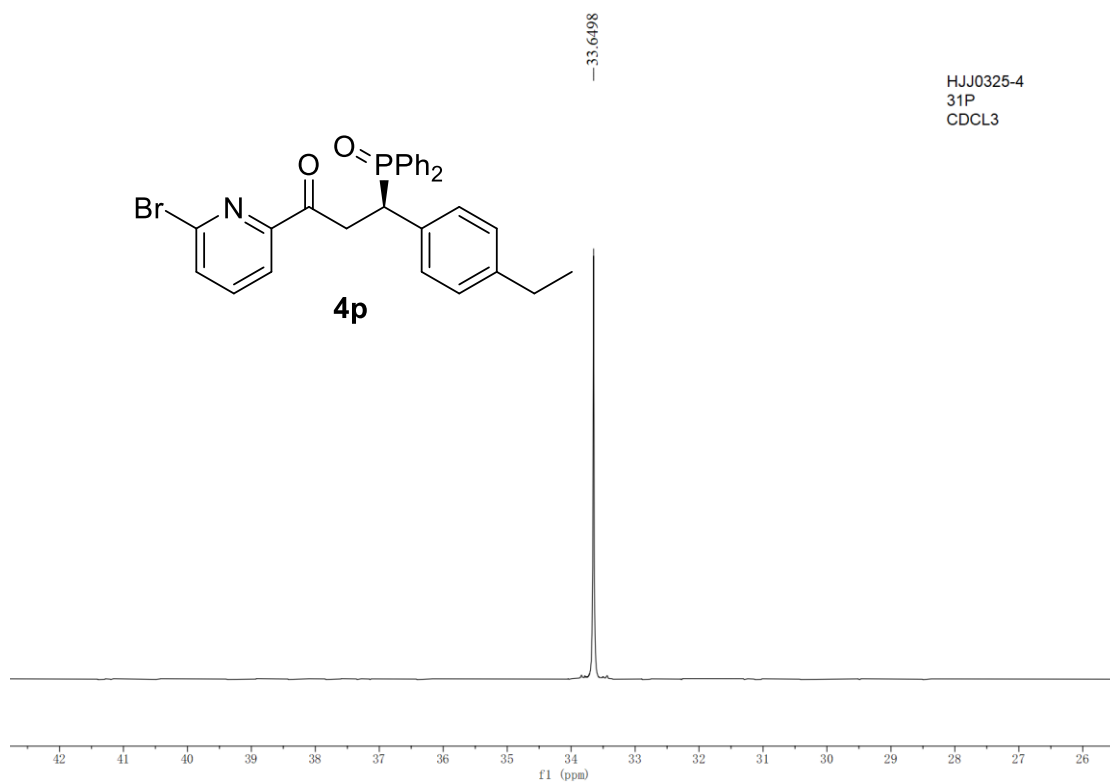

$^{31}\text{P}\{^1\text{H}\}$  NMR spectrum of **4p** (243 MHz,  $\text{CDCl}_3$ )

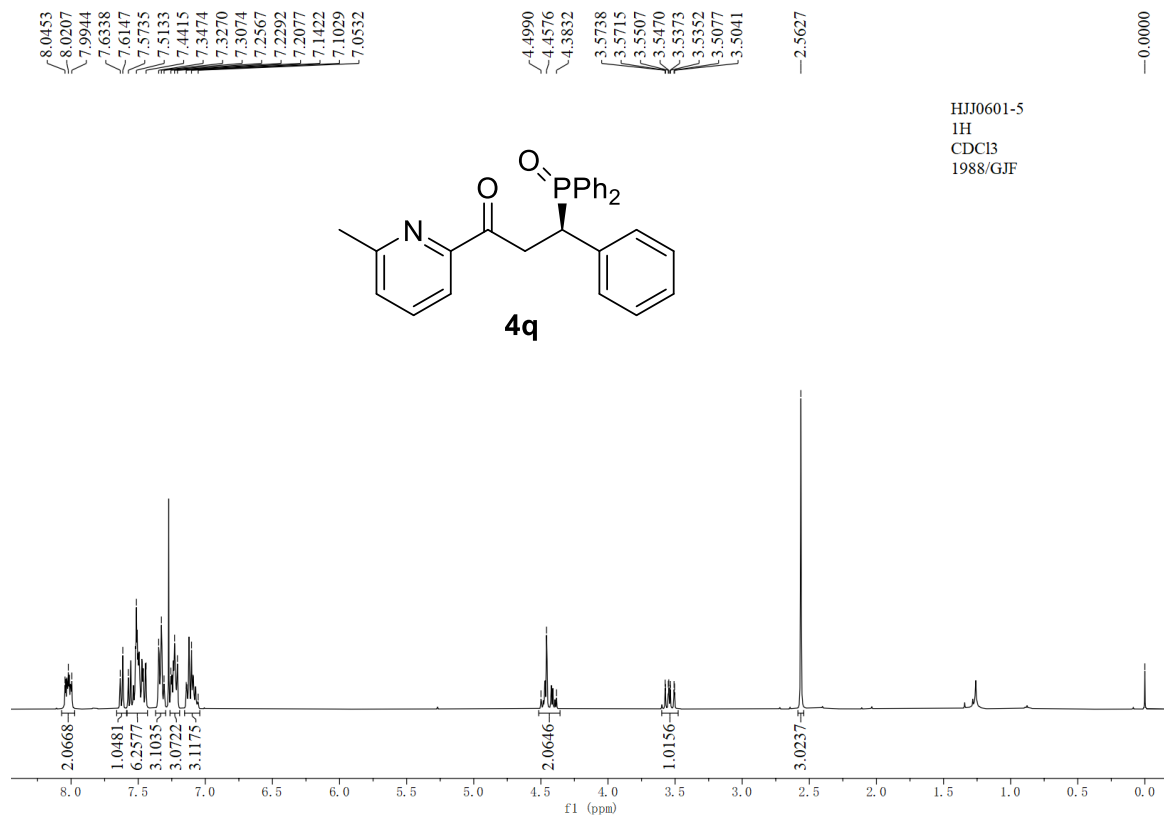

$^1\text{H}$  NMR spectrum of **4q** (400 MHz,  $\text{CDCl}_3$ )

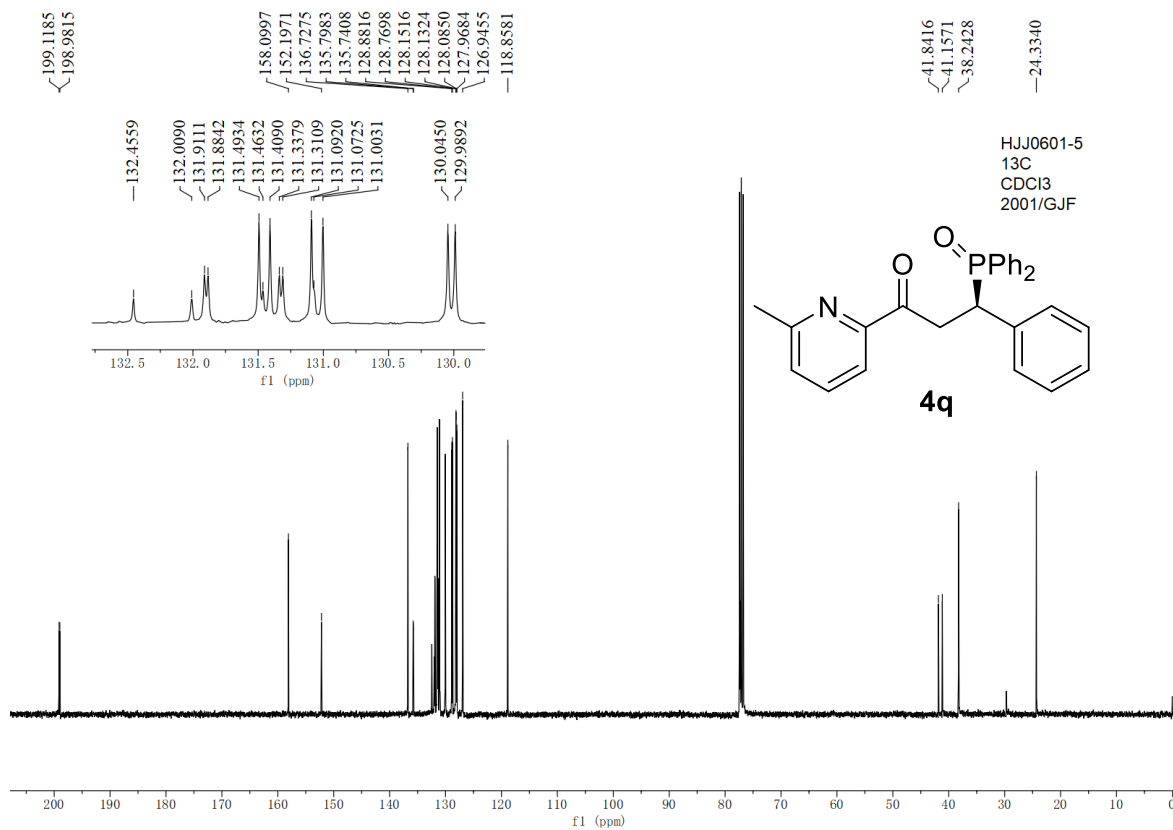

$^{13}\text{C}\{^1\text{H}\}$  NMR spectrum of **4q** (100 MHz,  $\text{CDCl}_3$ )

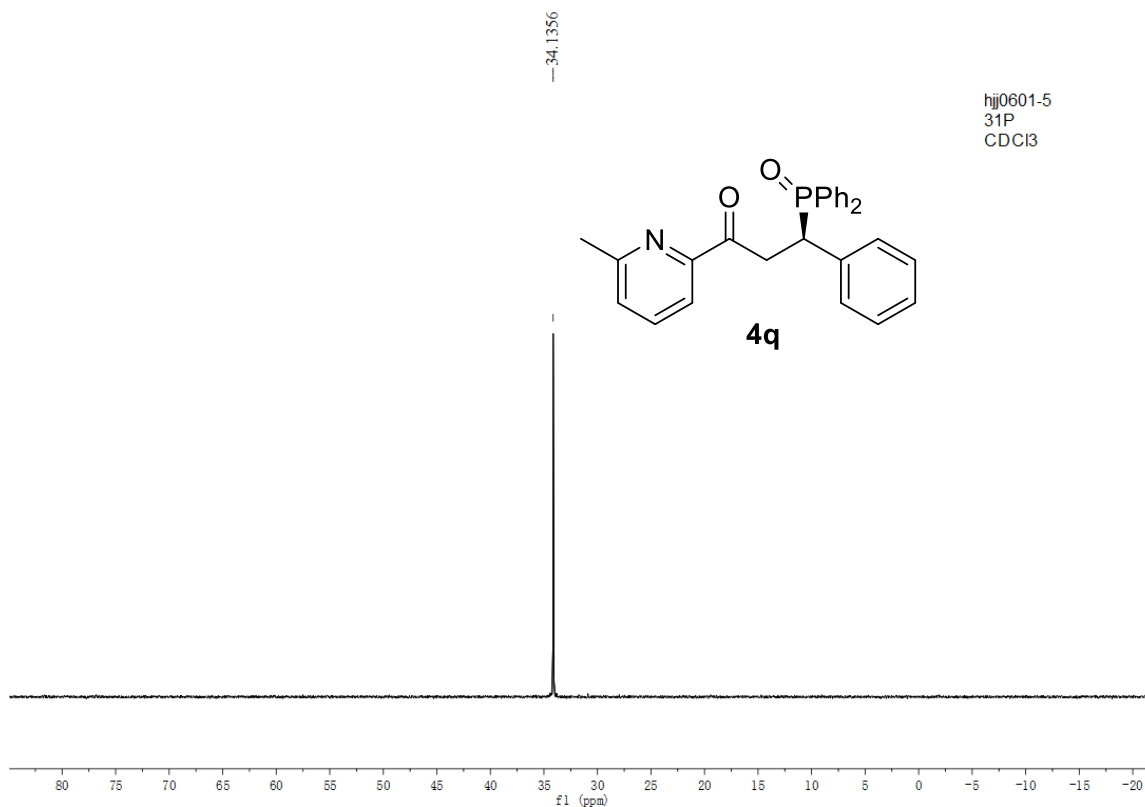

$^{31}\text{P}\{^1\text{H}\}$  NMR spectrum of **4q** (163 MHz,  $\text{CDCl}_3$ )

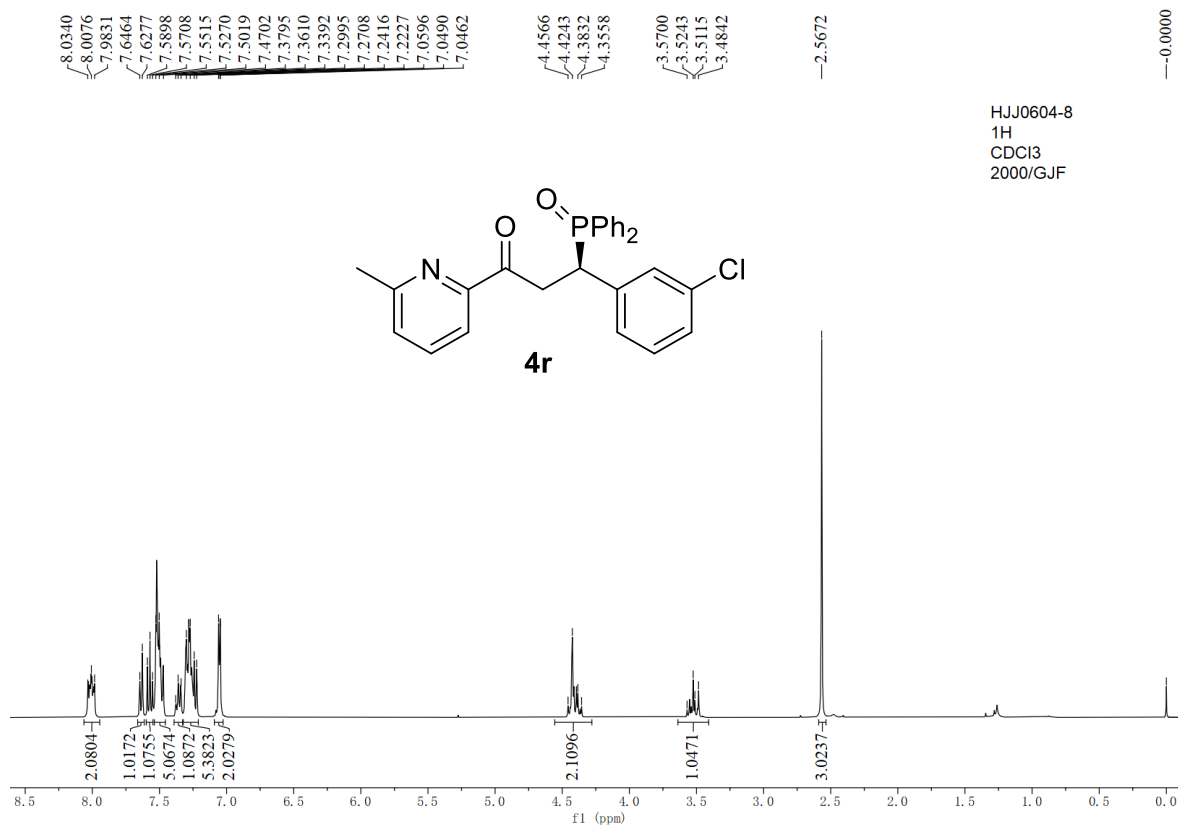

$^1\text{H}$  NMR spectrum of **4r** (400 MHz,  $\text{CDCl}_3$ )

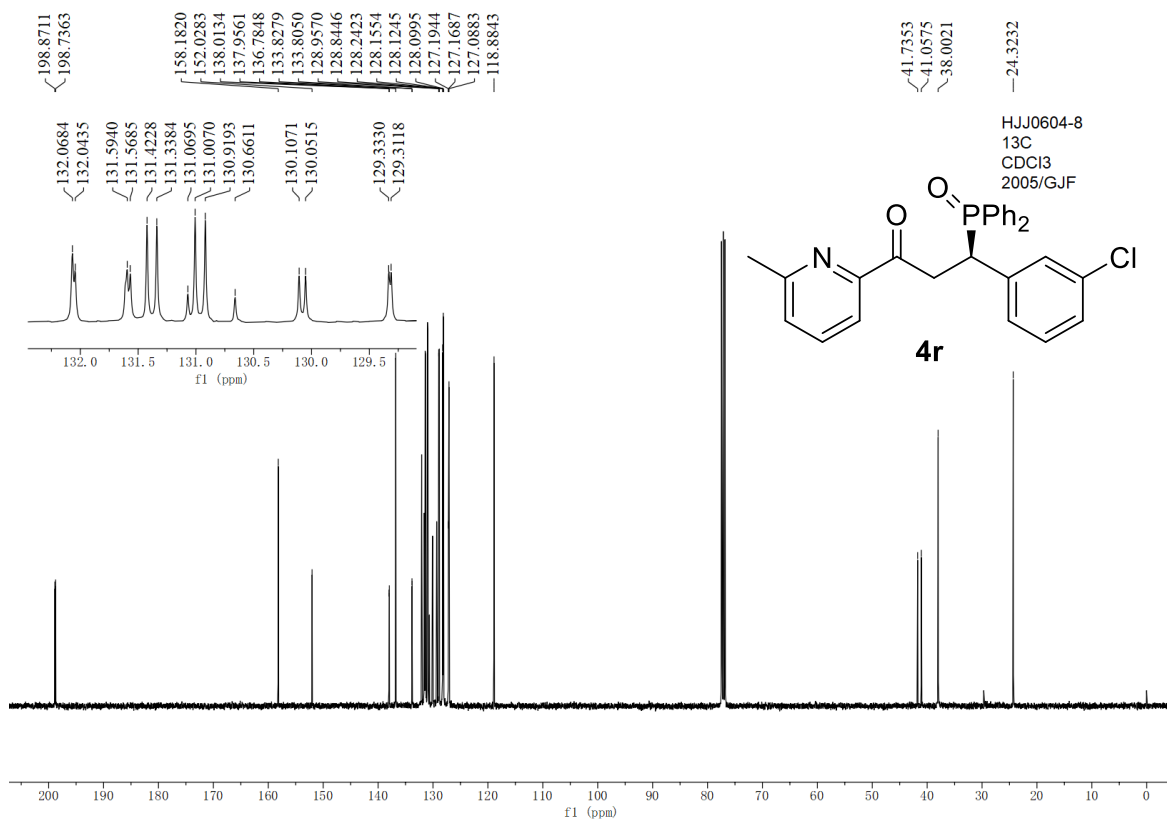

<sup>13</sup>C{<sup>1</sup>H} NMR spectrum of **4r** (100 MHz, CDCl<sub>3</sub>)

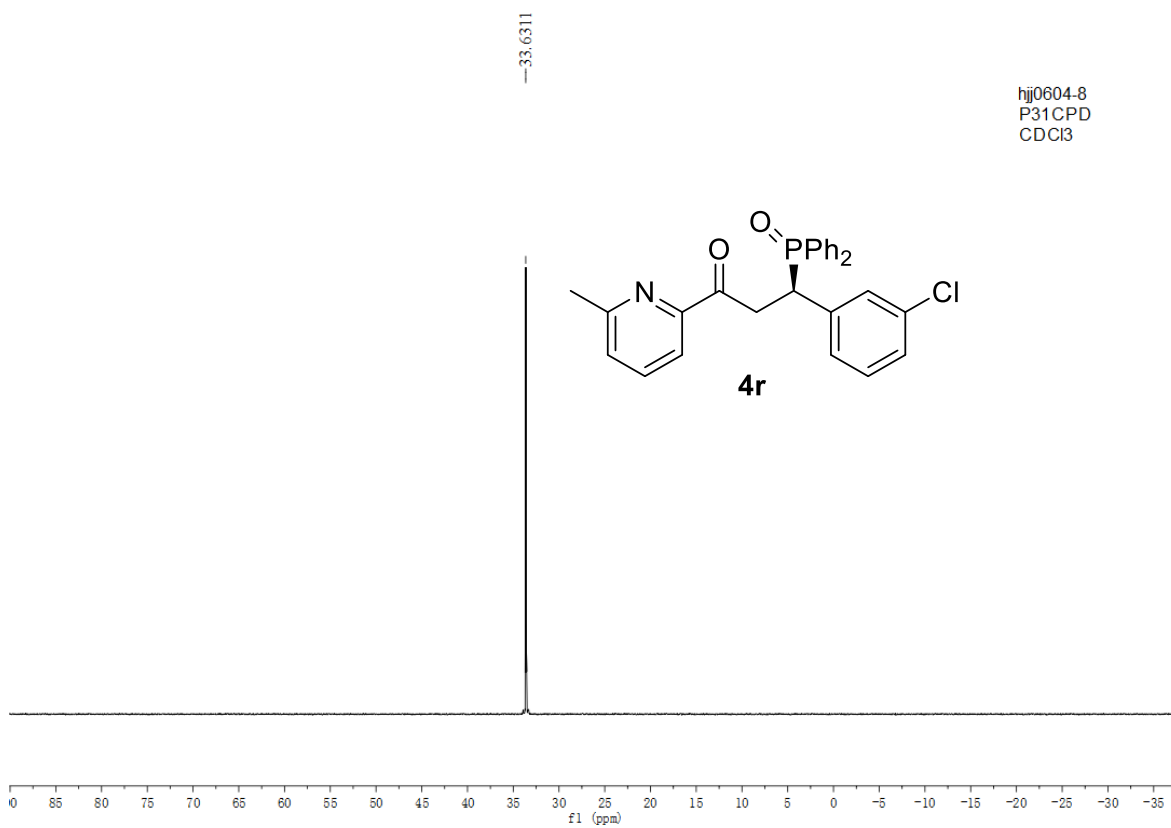

<sup>31</sup>P{<sup>1</sup>H} NMR spectrum of **4r** (163 MHz, CDCl<sub>3</sub>)



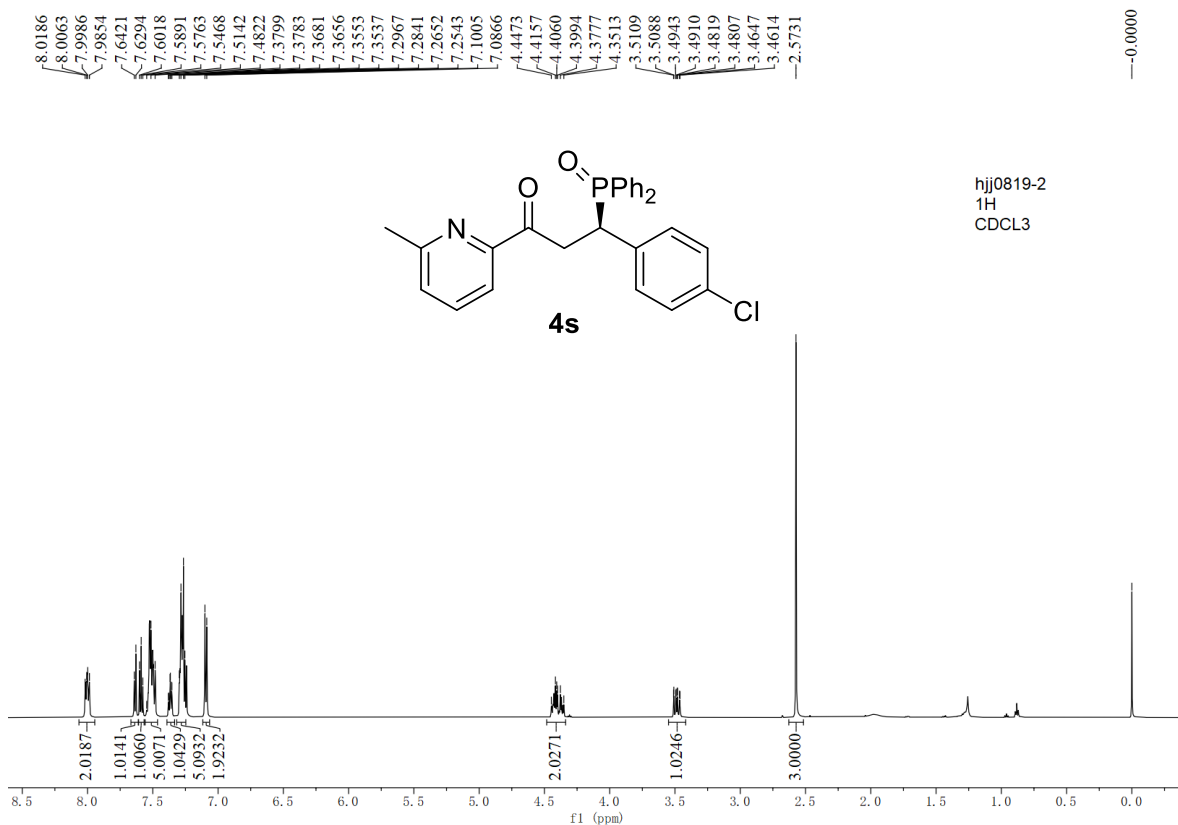

<sup>1</sup>H NMR spectrum of **4s** (600 MHz, CDCl<sub>3</sub>)

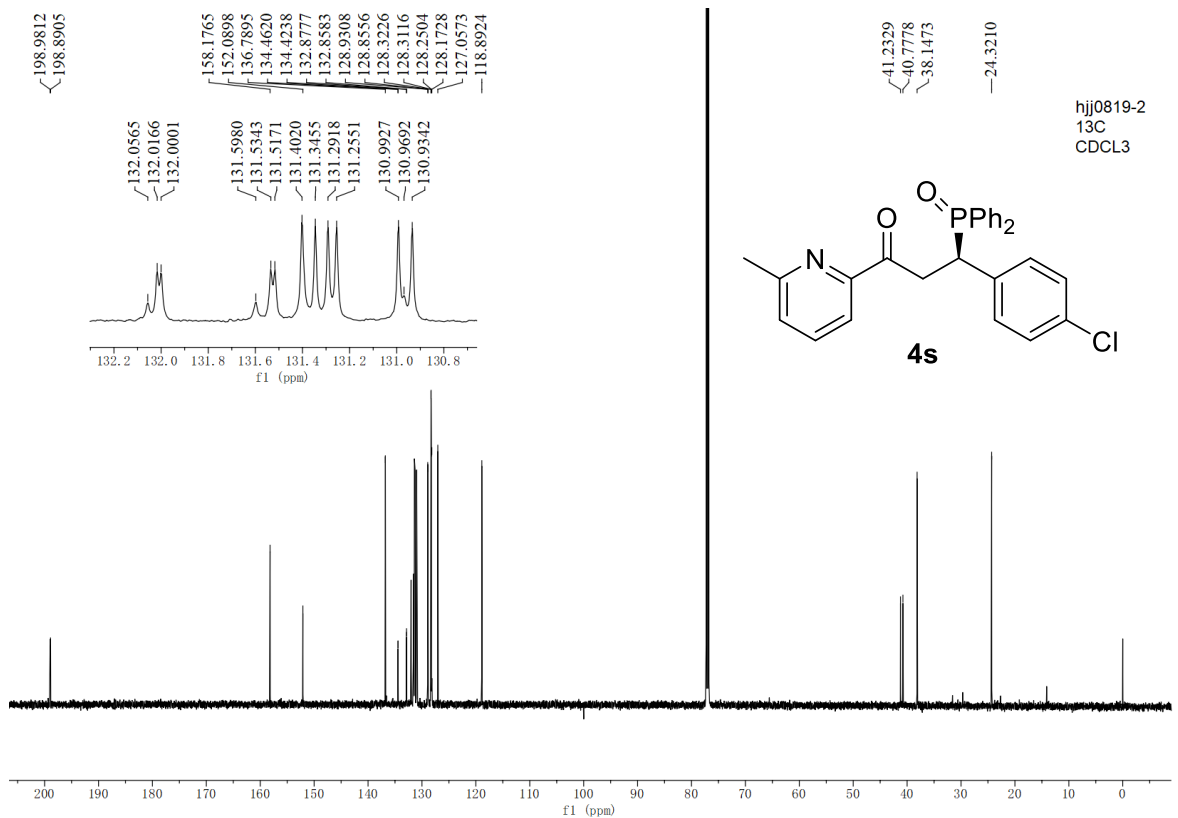

<sup>13</sup>C {<sup>1</sup>H} NMR spectrum of **4s** (150 MHz, CDCl<sub>3</sub>)

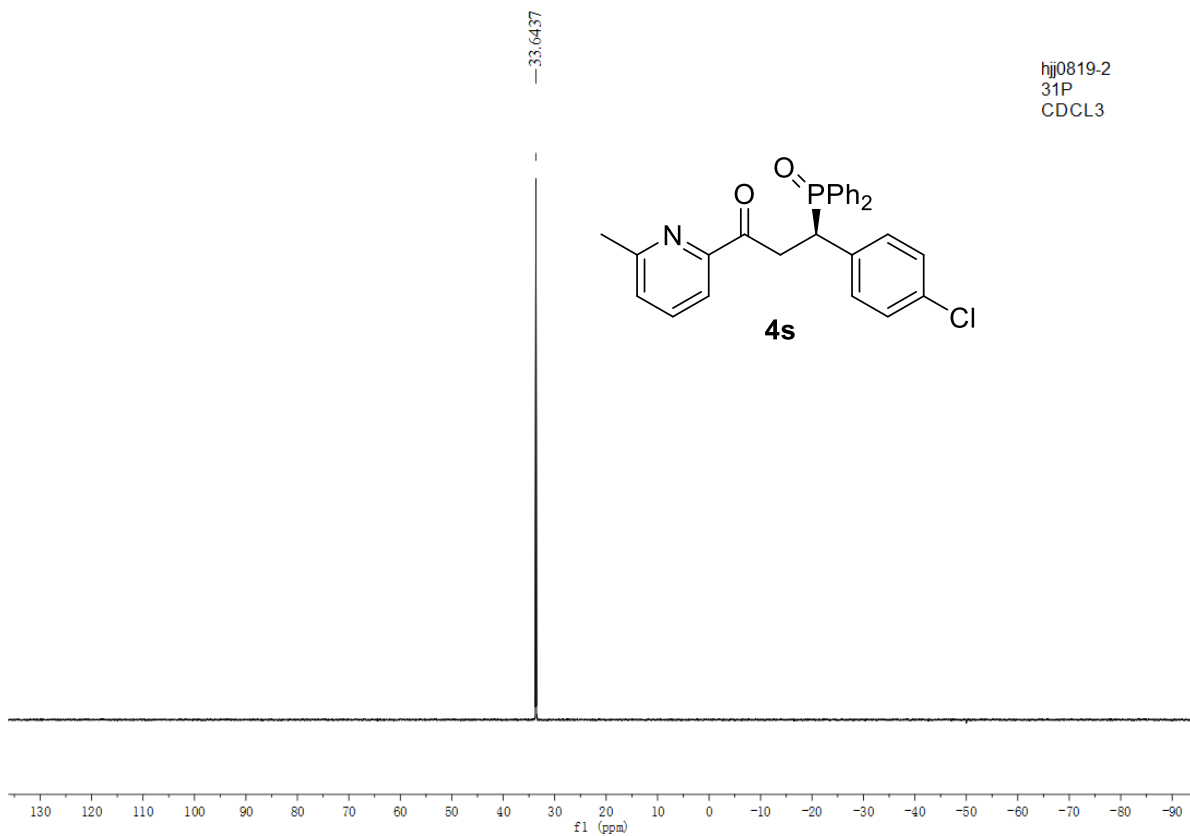

<sup>31</sup>P{<sup>1</sup>H} NMR spectrum of **4s** (243 MHz, CDCl<sub>3</sub>)

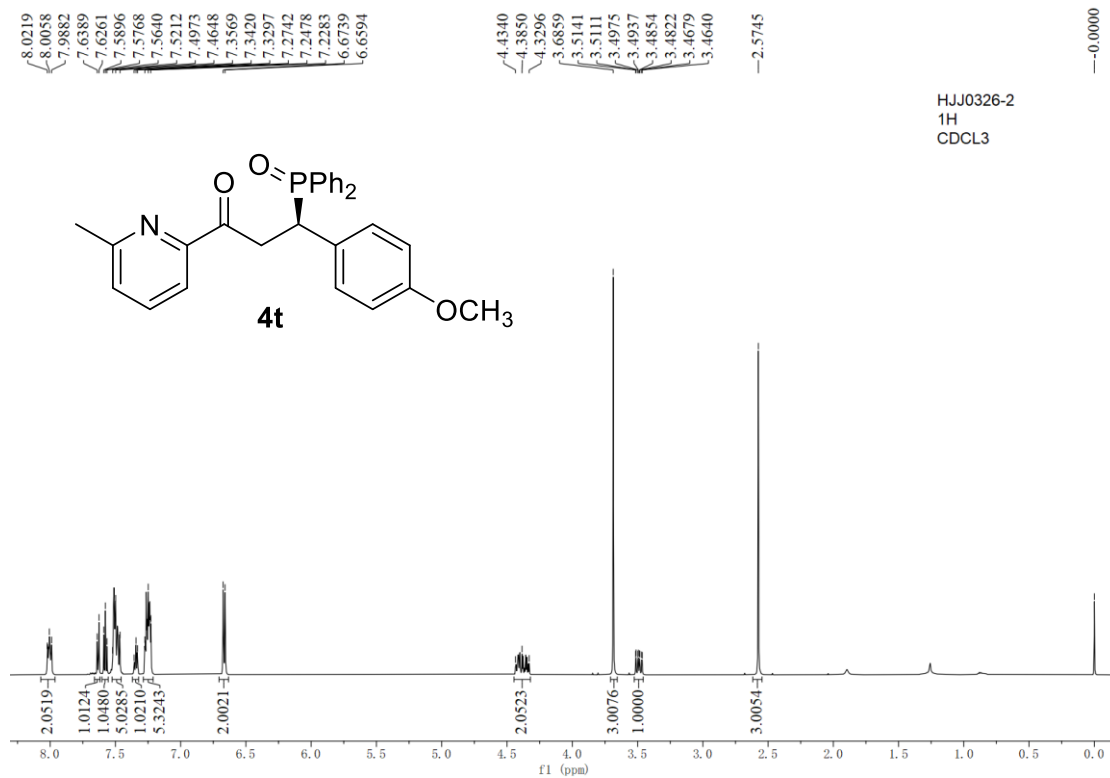

<sup>1</sup>H NMR spectrum of **4t** (600 MHz, CDCl<sub>3</sub>)

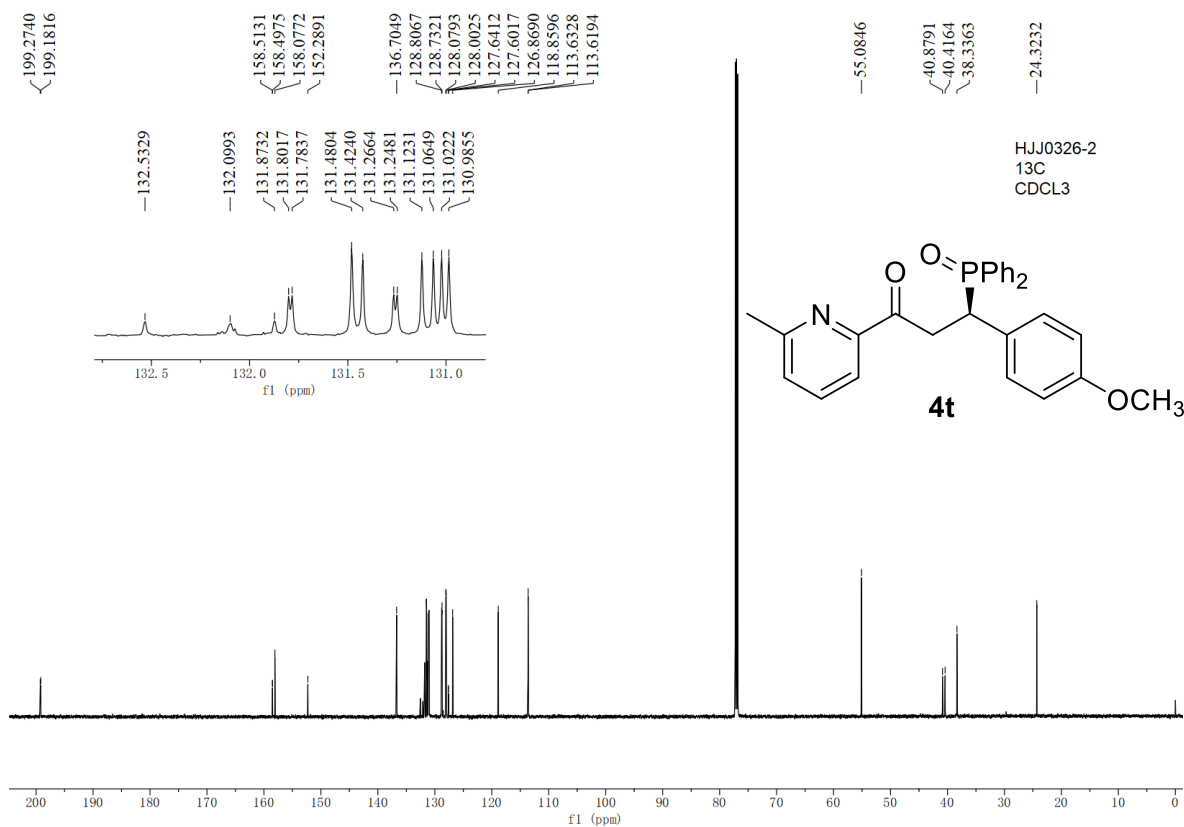

$^{13}\text{C}\{^1\text{H}\}$  NMR spectrum of **4t** (150 MHz,  $\text{CDCl}_3$ )

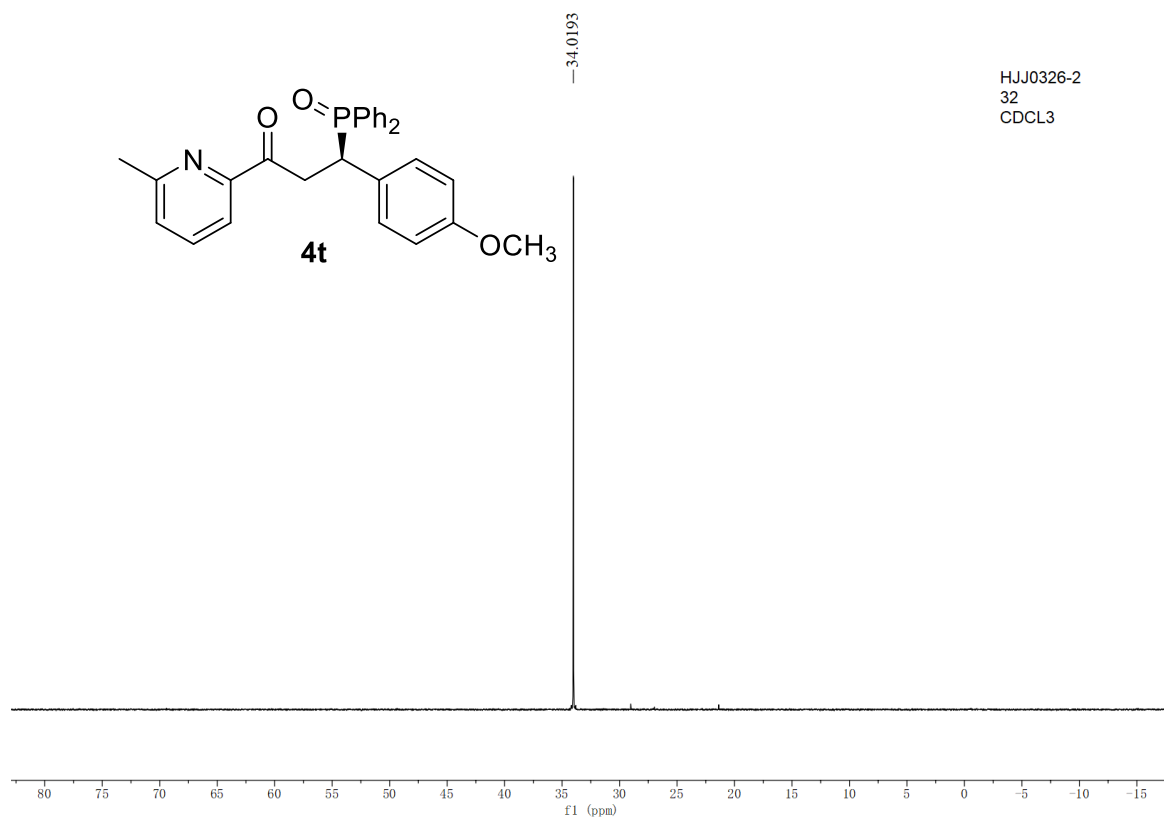

$^{31}\text{P}\{^1\text{H}\}$  NMR spectrum of **4t** (243 MHz,  $\text{CDCl}_3$ )

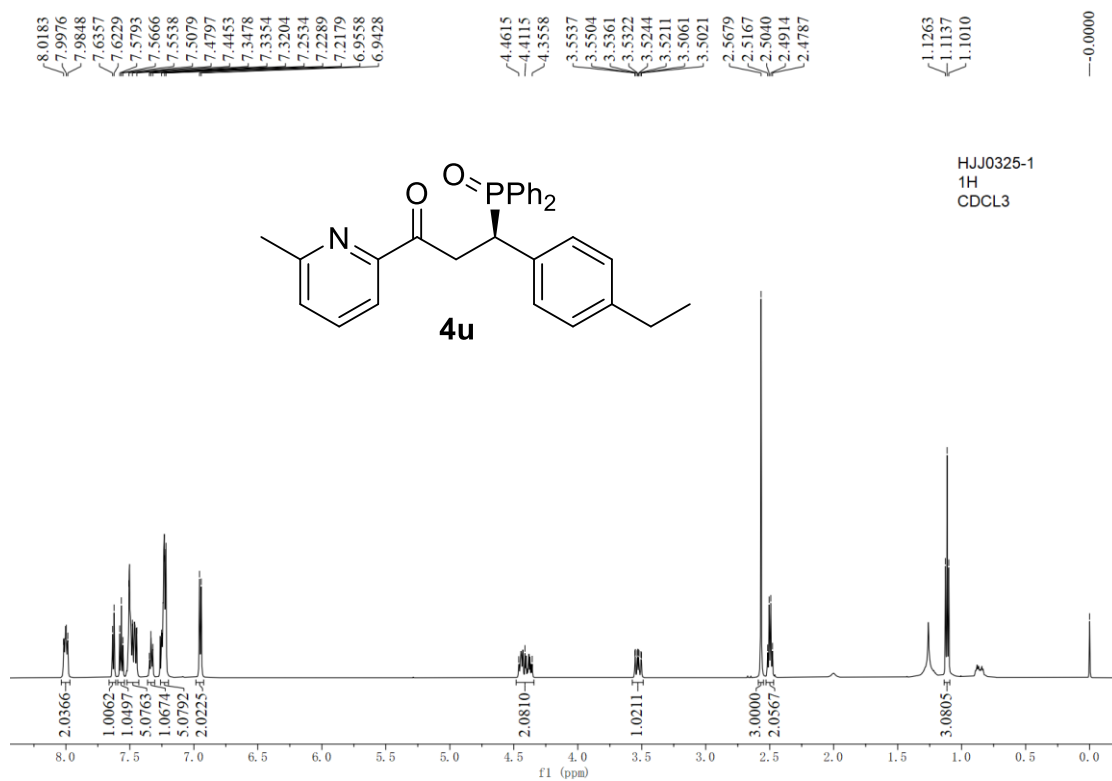

**<sup>1</sup>H NMR spectrum of 4u (600 MHz, CDCl<sub>3</sub>)**

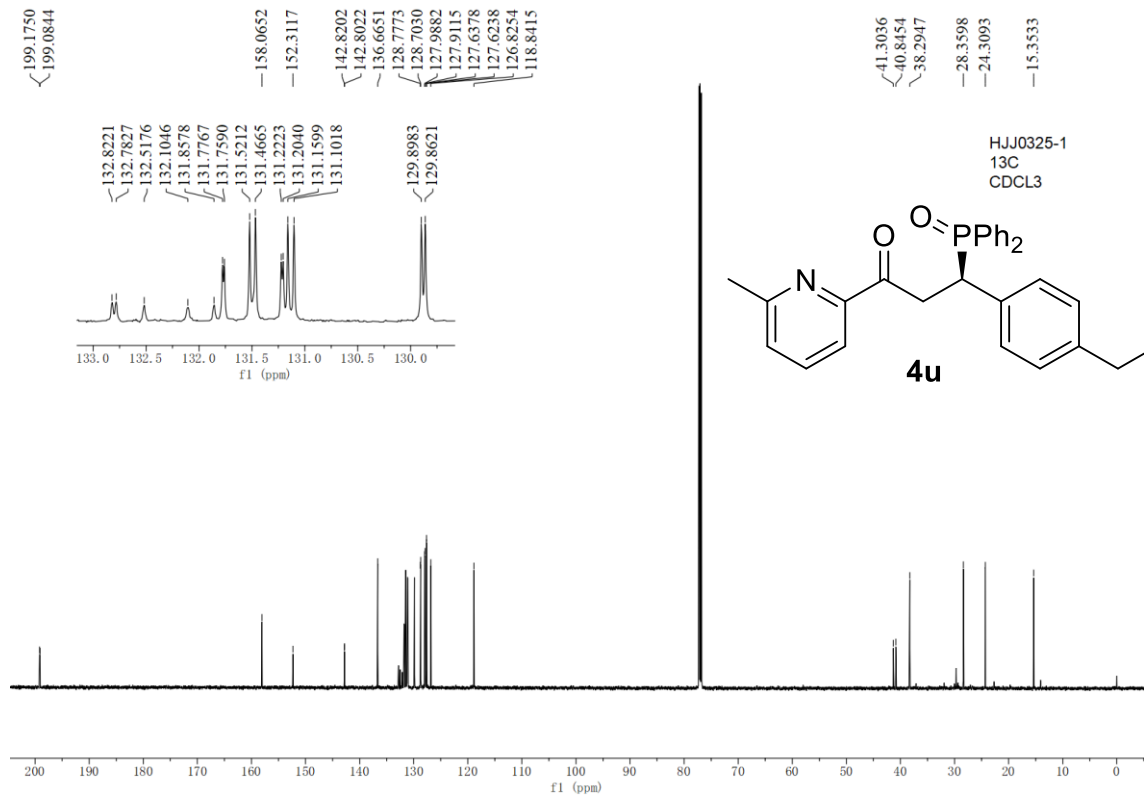

**<sup>13</sup>C {<sup>1</sup>H} NMR spectrum of 4u (150 MHz, CDCl<sub>3</sub>)**

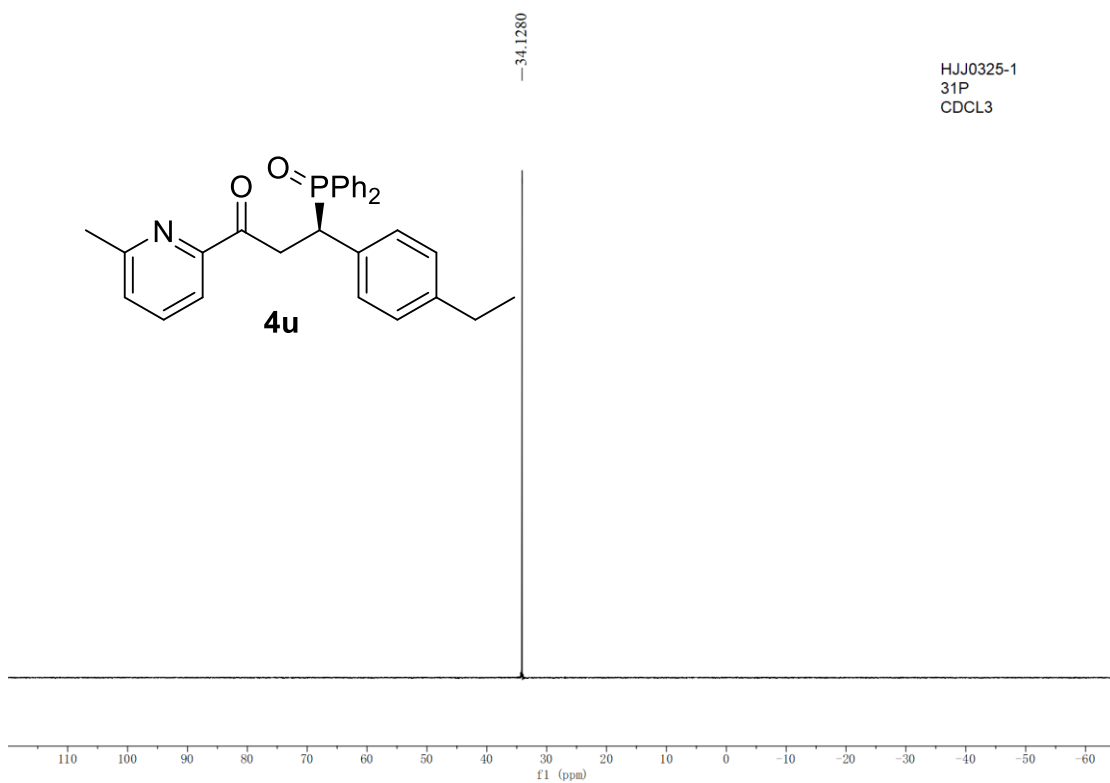

$^{31}\text{P}\{^1\text{H}\}$  NMR spectrum of **4u** (243 MHz,  $\text{CDCl}_3$ )

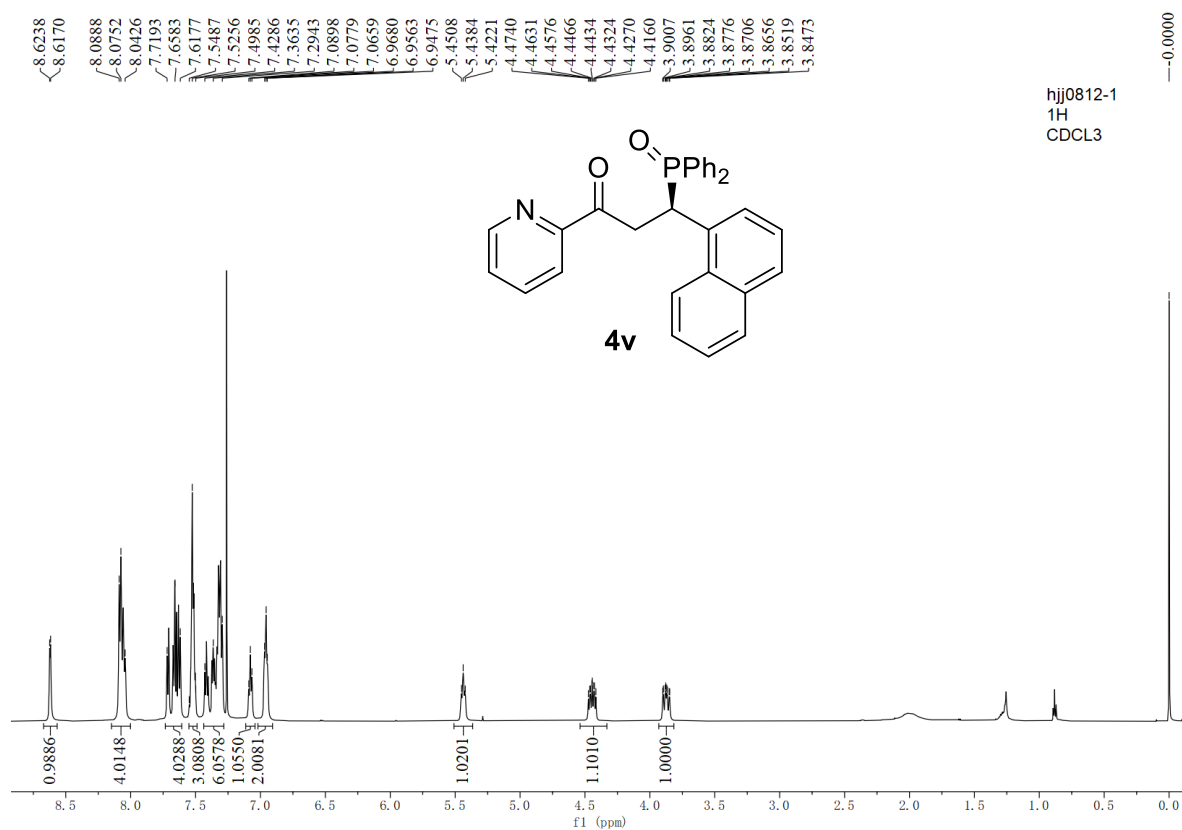

$^1\text{H}$  NMR spectrum of **4v** (600 MHz,  $\text{CDCl}_3$ )

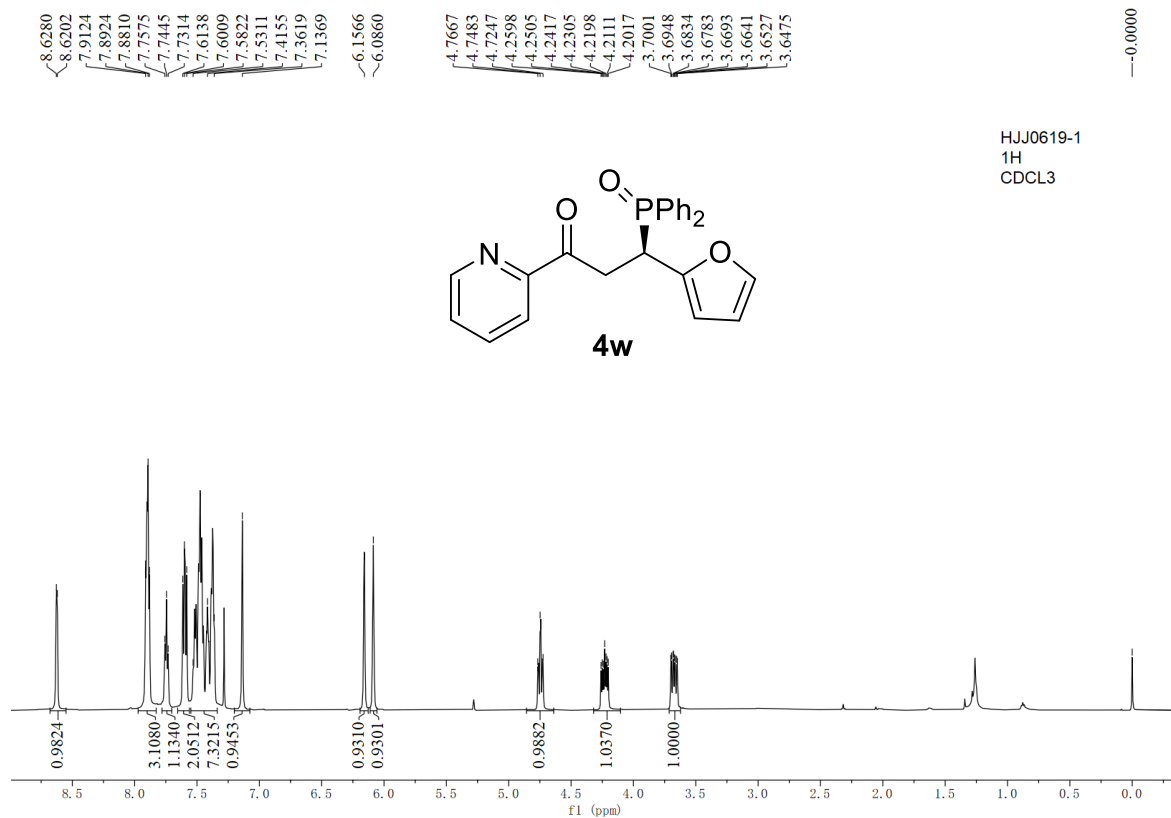

<sup>1</sup>H NMR spectrum of **4w** (600 MHz, CDCl<sub>3</sub>)

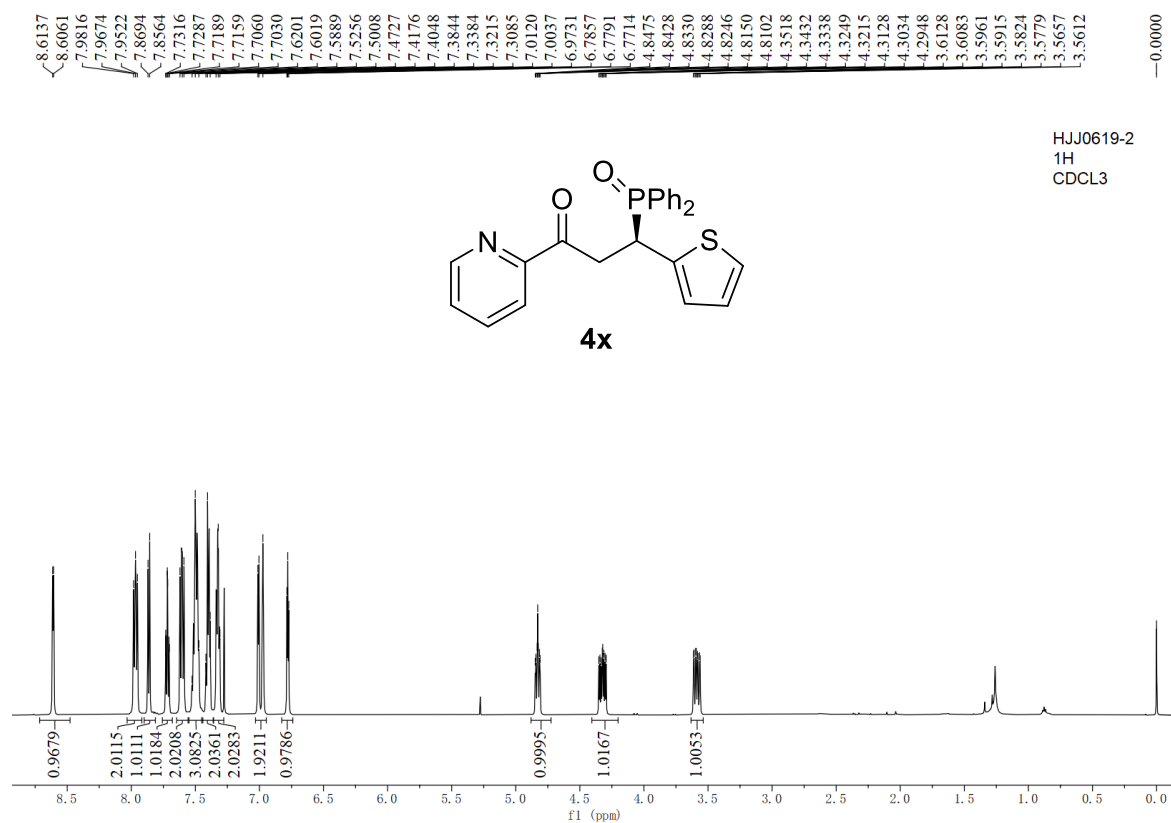

<sup>1</sup>H NMR spectrum of **4x** (600 MHz, CDCl<sub>3</sub>)

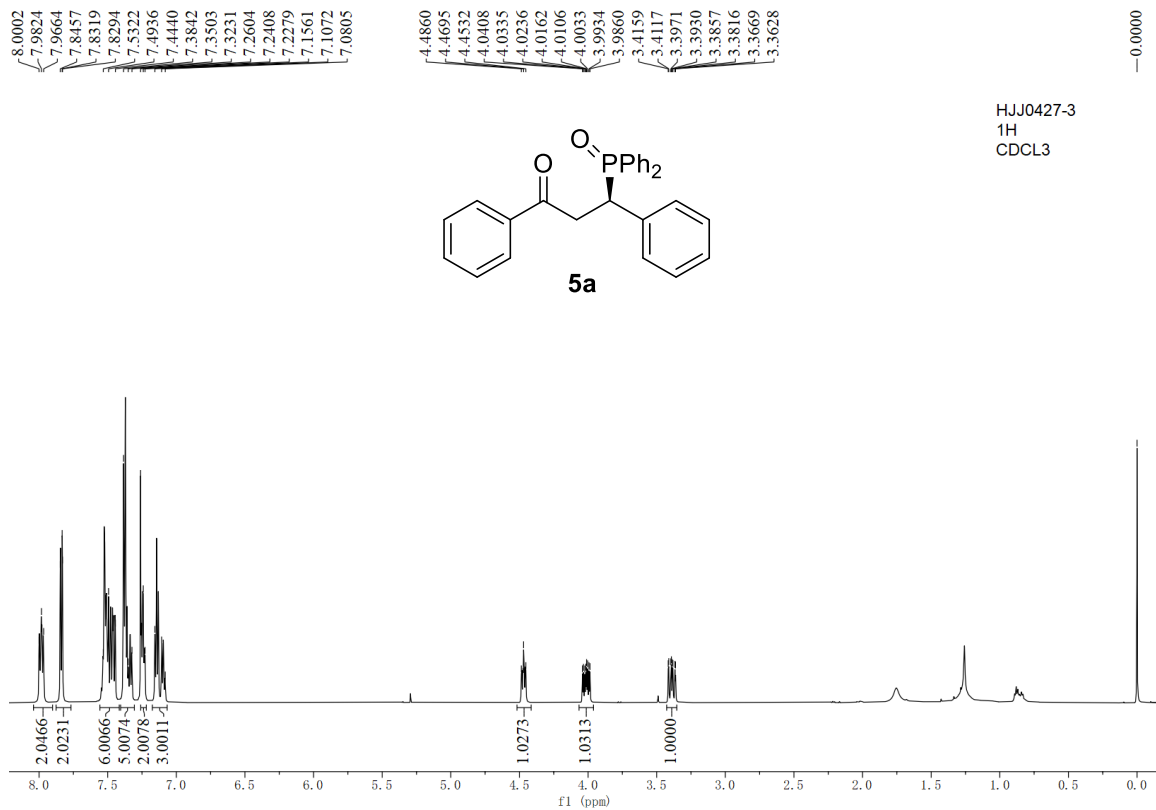

<sup>1</sup>H NMR spectrum of **5a** (600 MHz, CDCl<sub>3</sub>)

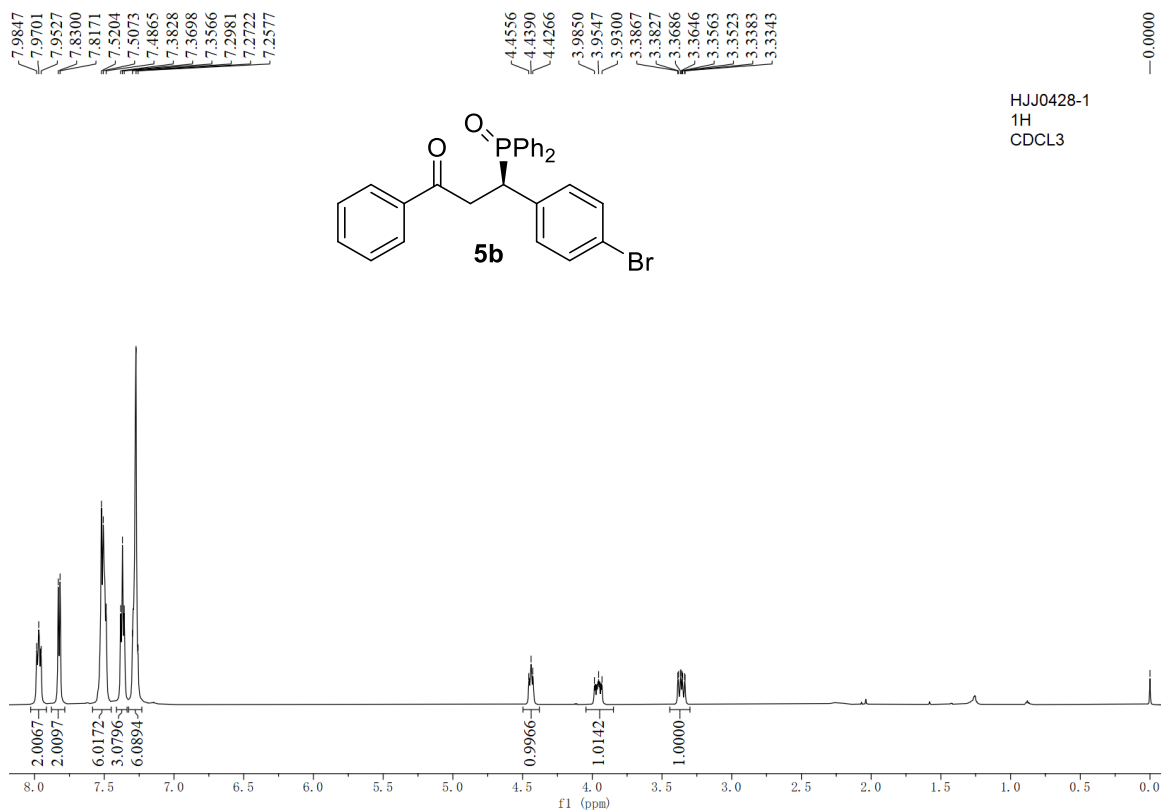

<sup>1</sup>H NMR spectrum of **5b** (600 MHz, CDCl<sub>3</sub>)

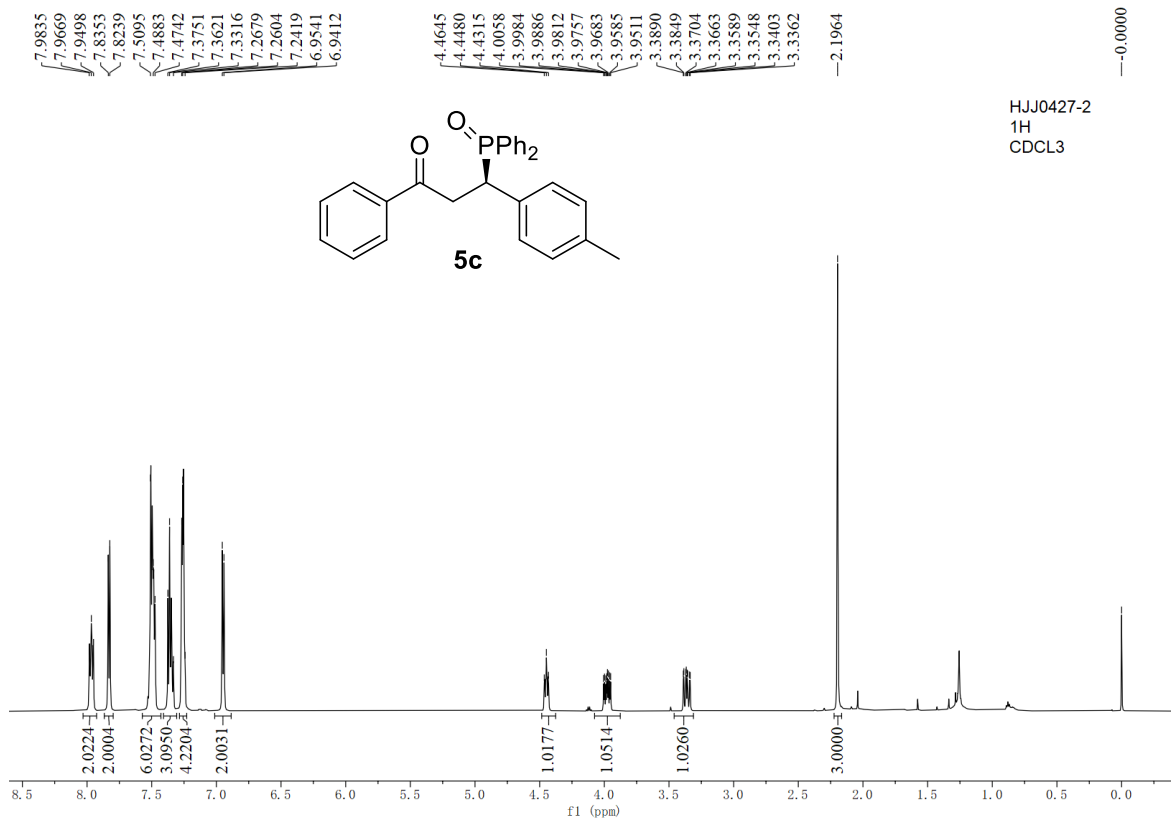

<sup>1</sup>H NMR spectrum of **5c** (600 MHz, CDCl<sub>3</sub>)

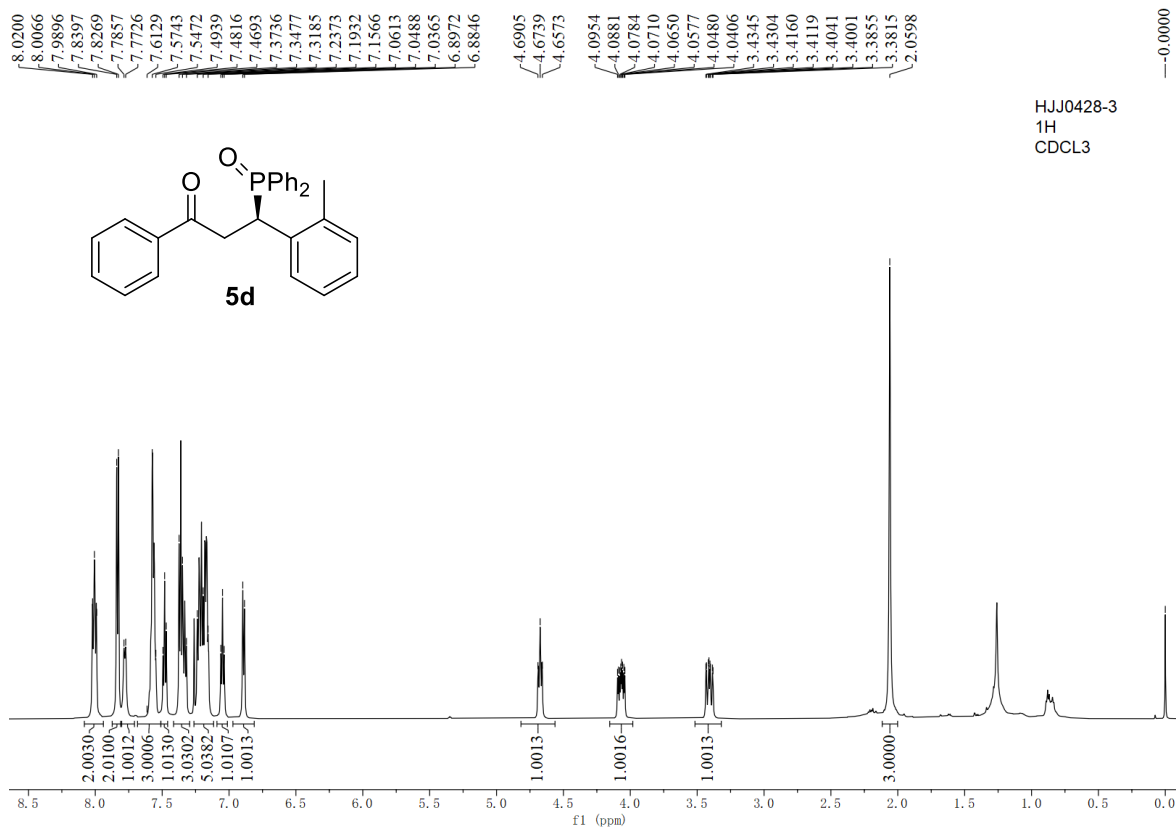

<sup>1</sup>H NMR spectrum of **5d** (600 MHz, CDCl<sub>3</sub>)



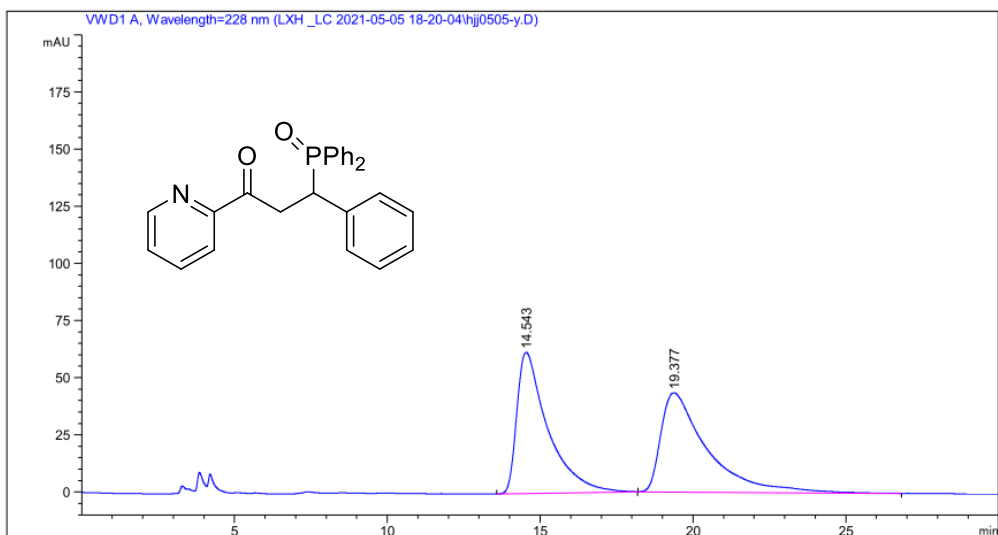

| PeakNO. | Ret.Time | PeakArea   | PeakHeight | Area%   |
|---------|----------|------------|------------|---------|
| 1       | 14.543   | 4338.86328 | 61.76144   | 48.9106 |
| 2       | 19.377   | 4532.14697 | 43.36746   | 51.0894 |

Chiral HPLC chromatogram for racemic **4a**

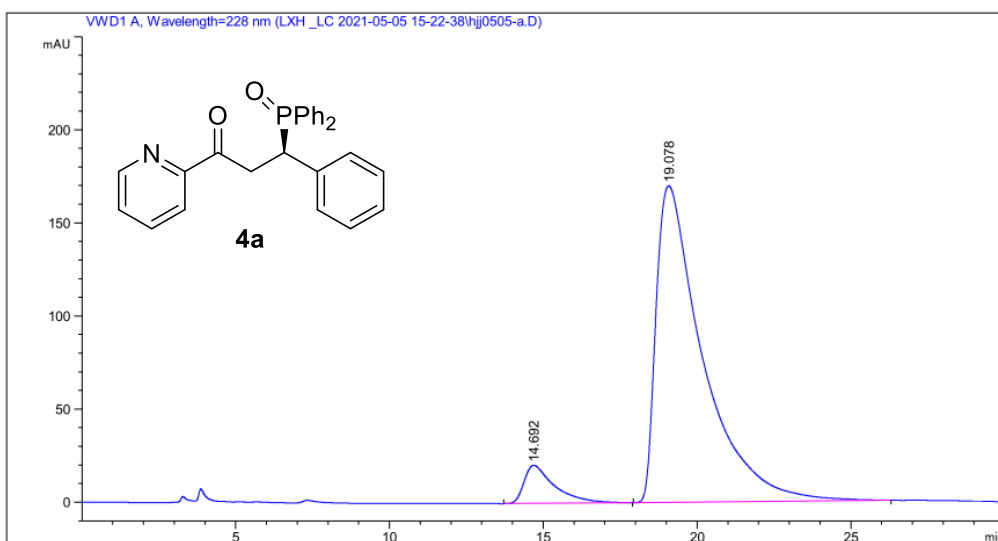

| PeakNO. | Ret.Time | PeakArea   | PeakHeight | Area%   |
|---------|----------|------------|------------|---------|
| 1       | 14.692   | 1409.67017 | 20.44440   | 7.3034  |
| 2       | 19.078   | 1.78920e4  | 170.00290  | 92.6966 |

Chiral HPLC chromatogram for enantioenriched **4a**

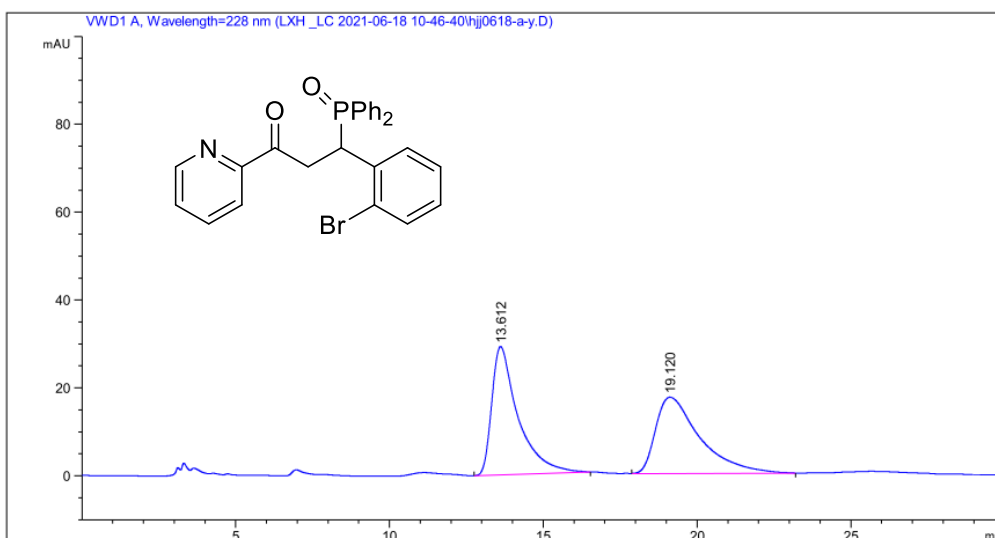

Chiral HPLC chromatogram for racemic **4b**

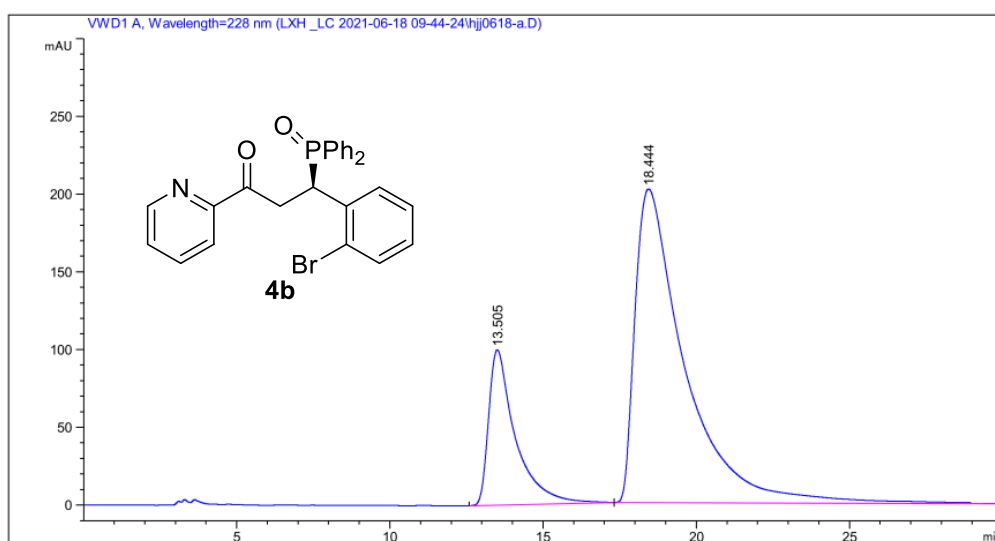

Chiral HPLC chromatogram for enantioenriched **4b**

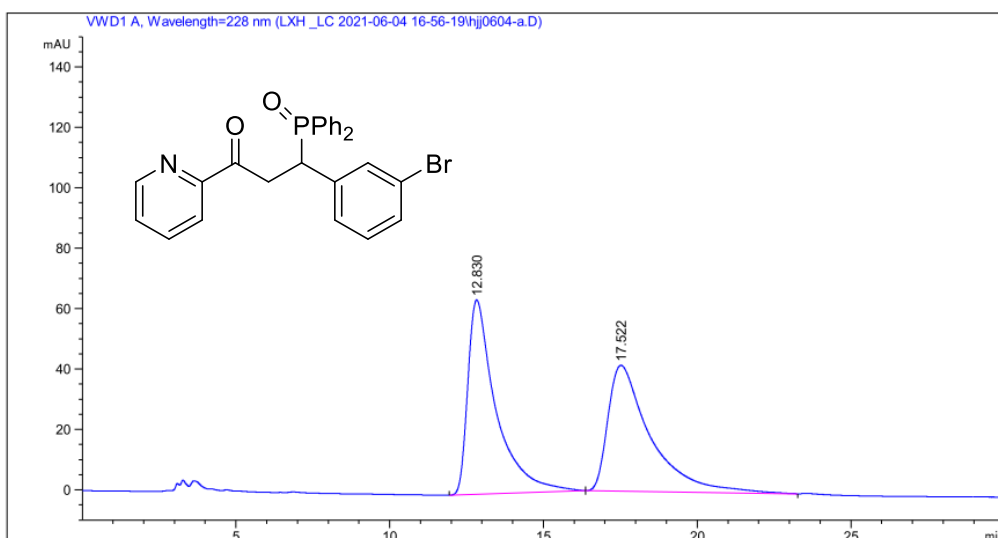

| PeakNO. | Ret.Time | PeakArea   | PeakHeight | Area%   |
|---------|----------|------------|------------|---------|
| 1       | 12.830   | 4098.35791 | 64.34928   | 50.6686 |
| 2       | 17.522   | 3990.20532 | 41.68118   | 49.3314 |

Chiral HPLC chromatogram for racemic **4c**

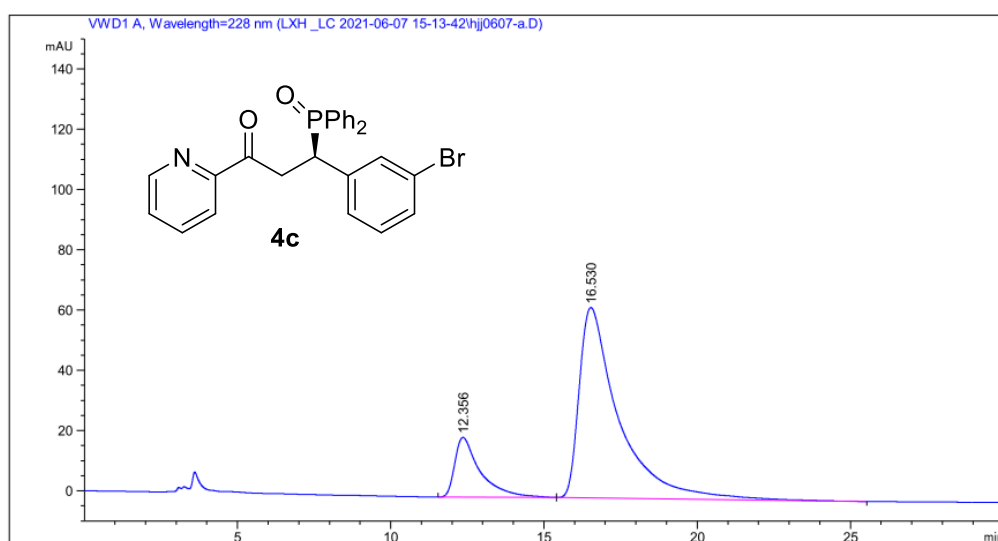

| PeakNO. | Ret.Time | PeakArea   | PeakHeight | Area%   |
|---------|----------|------------|------------|---------|
| 1       | 12.356   | 1147.78784 | 19.87691   | 16.7586 |
| 2       | 16.530   | 5701.14941 | 63.21720   | 83.2414 |

Chiral HPLC chromatogram for enantioenriched **4c**

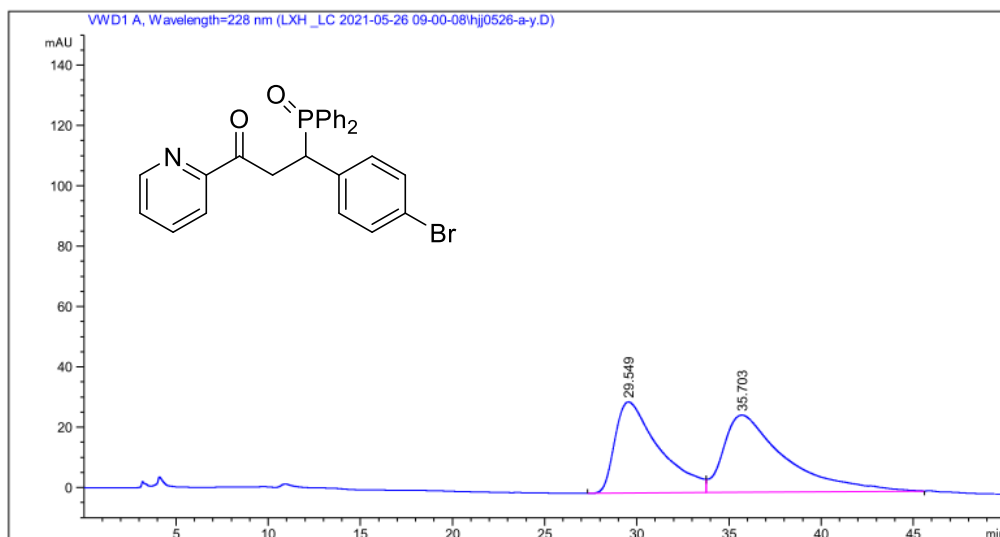

Chiral HPLC chromatogram for racemic **4d**

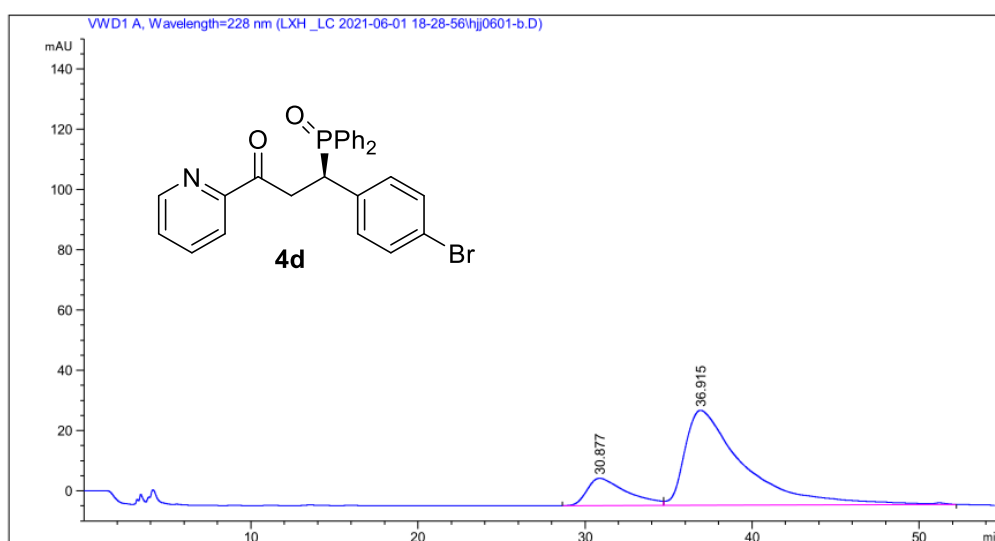

Chiral HPLC chromatogram for enantioenriched **4d**

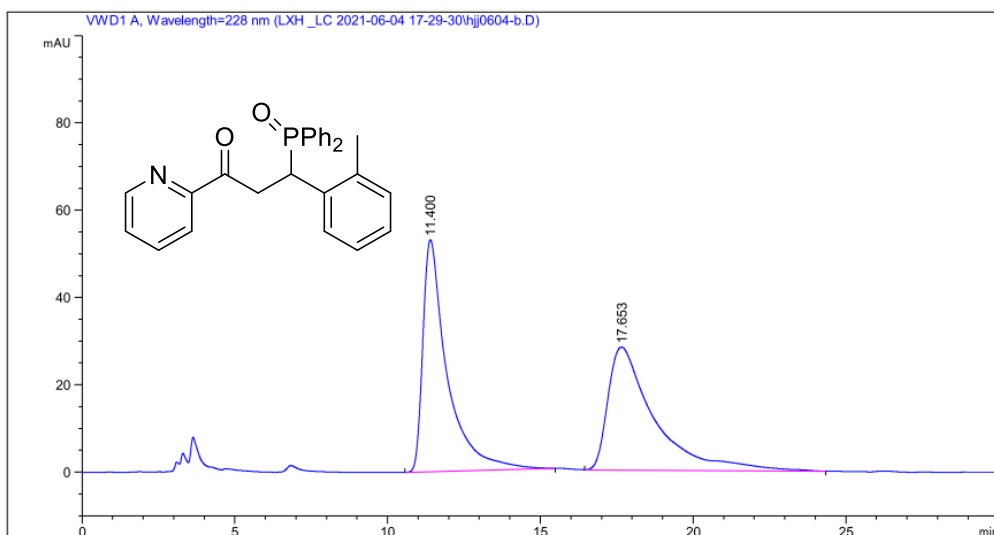

| PeakNO. | Ret.Time | PeakArea   | PeakHeight | Area%   |
|---------|----------|------------|------------|---------|
| 1       | 11.400   | 2936.97095 | 53.12720   | 49.7166 |
| 2       | 17.653   | 2970.45483 | 28.16958   | 50.2834 |

Chiral HPLC chromatogram for racemic **4e**

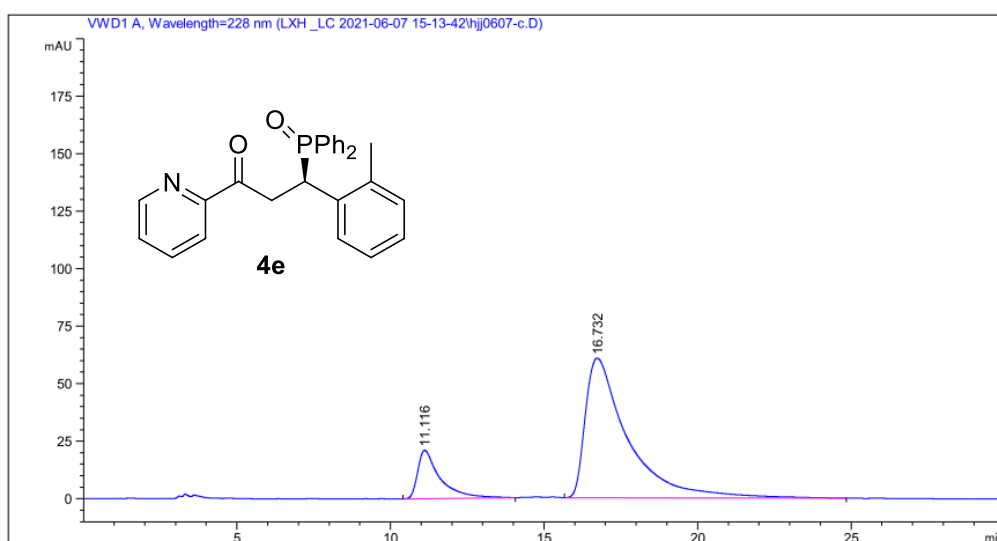

| PeakNO. | Ret.Time | PeakArea   | PeakHeight | Area%   |
|---------|----------|------------|------------|---------|
| 1       | 11.116   | 1058.98669 | 20.99481   | 15.3497 |
| 2       | 16.732   | 5840.08154 | 60.67751   | 84.6503 |

Chiral HPLC chromatogram for enantioenriched **4e**

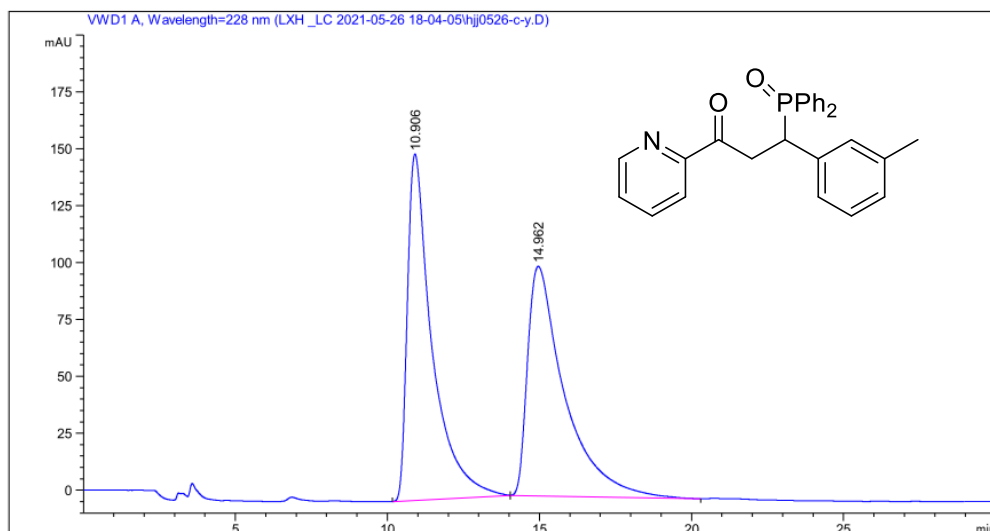

| PeakNO. | Ret.Time | PeakArea   | PeakHeight | Area%   |
|---------|----------|------------|------------|---------|
| 1       | 10.906   | 8583.00391 | 152.13066  | 50.2152 |
| 2       | 14.962   | 8509.45215 | 100.78463  | 49.7848 |

Chiral HPLC chromatogram for racemic **4f**

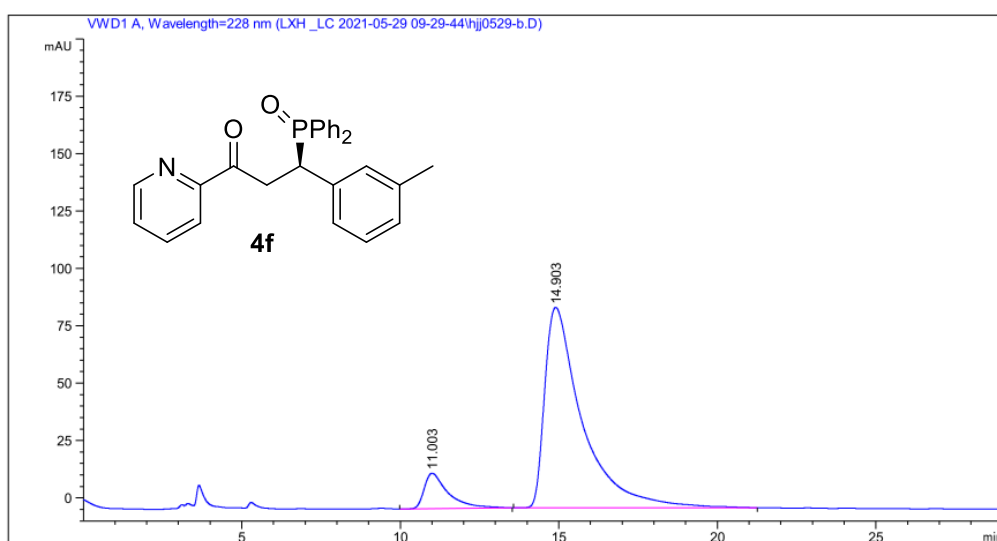

| PeakNO. | Ret.Time | PeakArea   | PeakHeight | Area%   |
|---------|----------|------------|------------|---------|
| 1       | 11.003   | 807.63409  | 15.4145    | 10.0869 |
| 2       | 14.903   | 7199.14160 | 87.30708   | 89.9131 |

Chiral HPLC chromatogram for enantioenriched **4f**

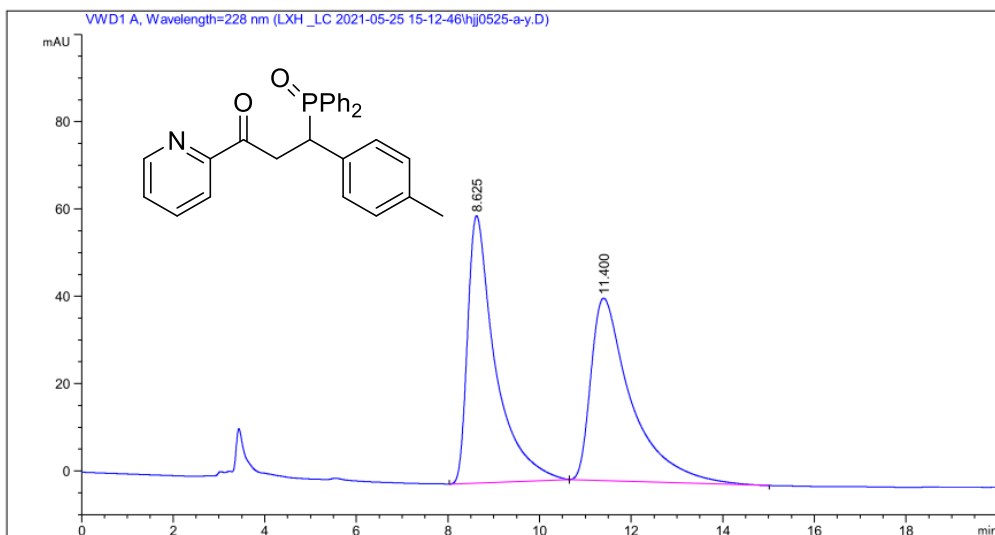

| PeakNO. | Ret.Time | PeakArea   | PeakHeight | Area%   |
|---------|----------|------------|------------|---------|
| 1       | 8.625    | 2566.92993 | 61.21783   | 50.1187 |
| 2       | 11.400   | 2554.76660 | 41.77489   | 49.8813 |

Chiral HPLC chromatogram for racemic **4g**

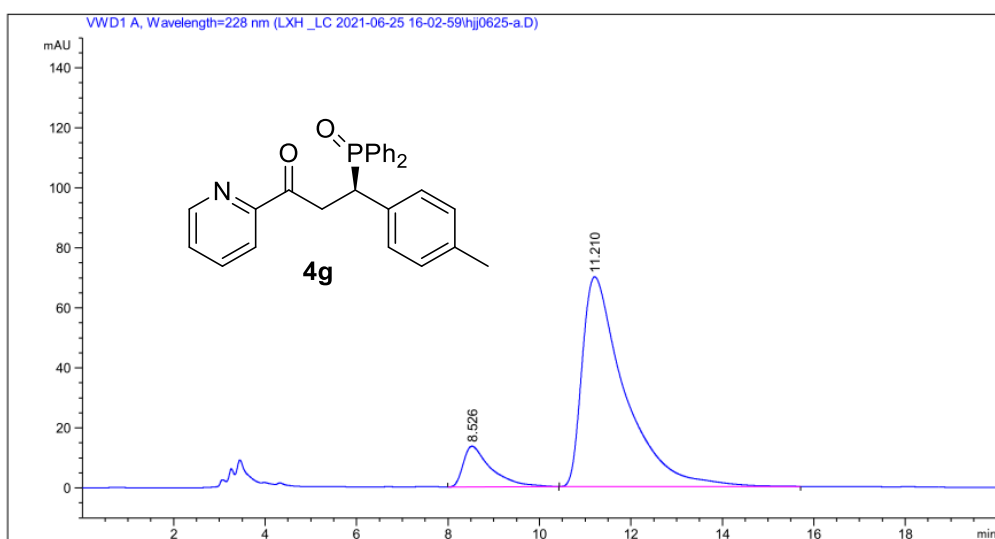

| PeakNO. | Ret.Time | PeakArea   | PeakHeight | Area%   |
|---------|----------|------------|------------|---------|
| 1       | 8.526    | 580.35913  | 13.63197   | 11.3664 |
| 2       | 11.210   | 4525.54688 | 69.95989   | 88.6336 |

Chiral HPLC chromatogram for enantioenriched **4g**

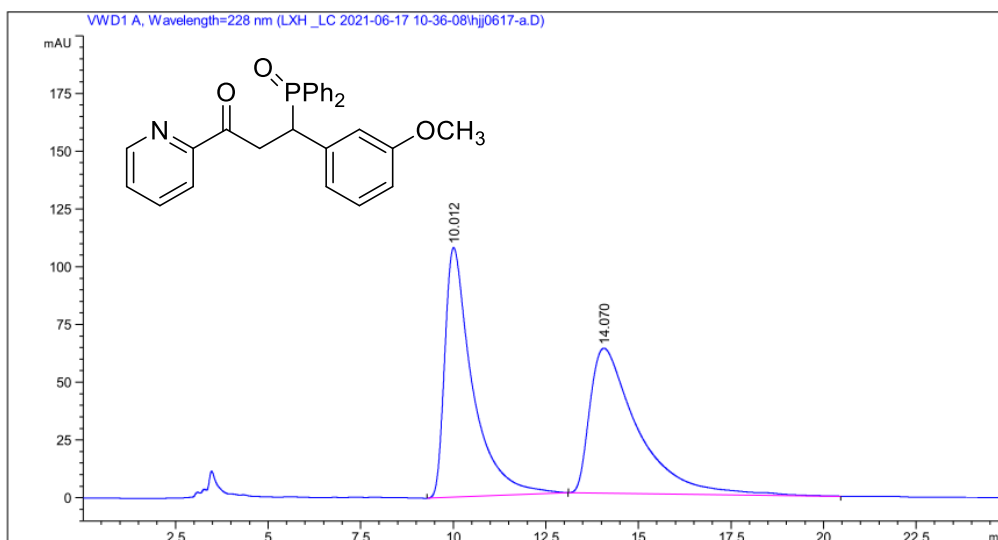

| PeakNO. | Ret.Time | PeakArea   | PeakHeight | Area%   |
|---------|----------|------------|------------|---------|
| 1       | 10.012   | 5627.56934 | 108.02071  | 50.0106 |
| 2       | 14.070   | 5625.17432 | 62.76397   | 49.9894 |

Chiral HPLC chromatogram for racemic **4h**

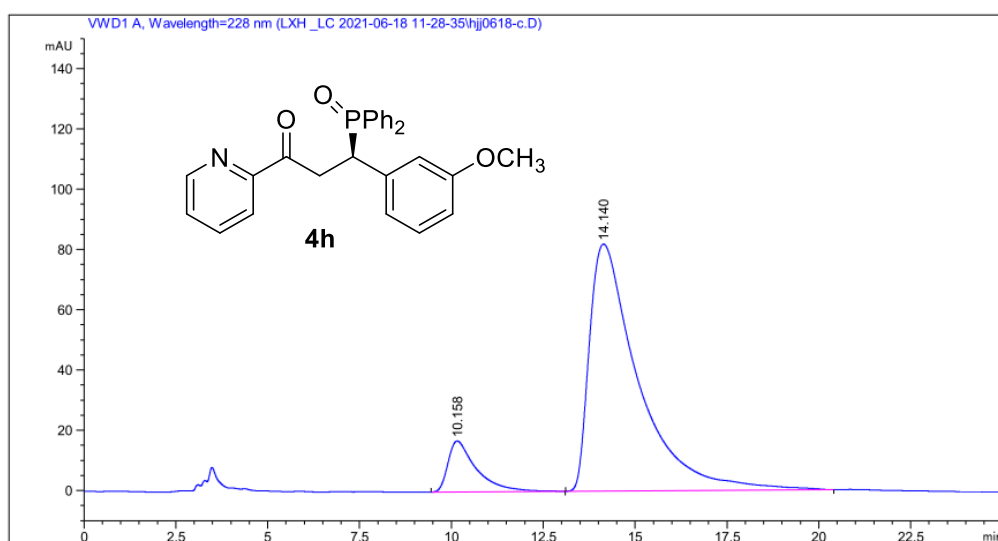

| PeakNO. | Ret.Time | PeakArea   | PeakHeight | Area%   |
|---------|----------|------------|------------|---------|
| 1       | 10.158   | 899.75726  | 16.88532   | 10.6014 |
| 2       | 14.140   | 7587.41797 | 81.93791   | 89.3986 |

Chiral HPLC chromatogram for enantioenriched **4h**



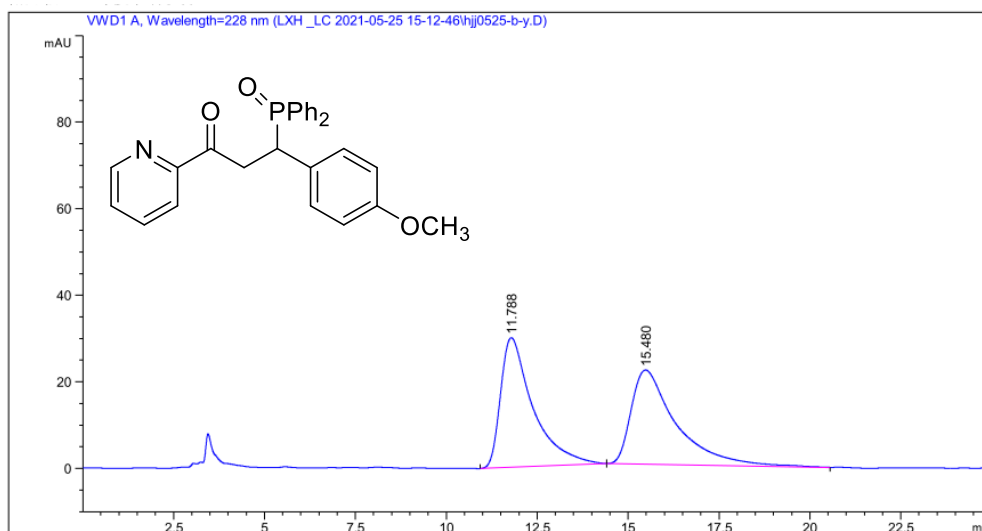

| PeakNO. | Ret.Time | PeakArea   | PeakHeight | Area%   |
|---------|----------|------------|------------|---------|
| 1       | 11.788   | 1853.45801 | 29.96197   | 49.8913 |
| 2       | 15.480   | 1861.53418 | 21.77329   | 50.1087 |

Chiral HPLC chromatogram for racemic **4i**

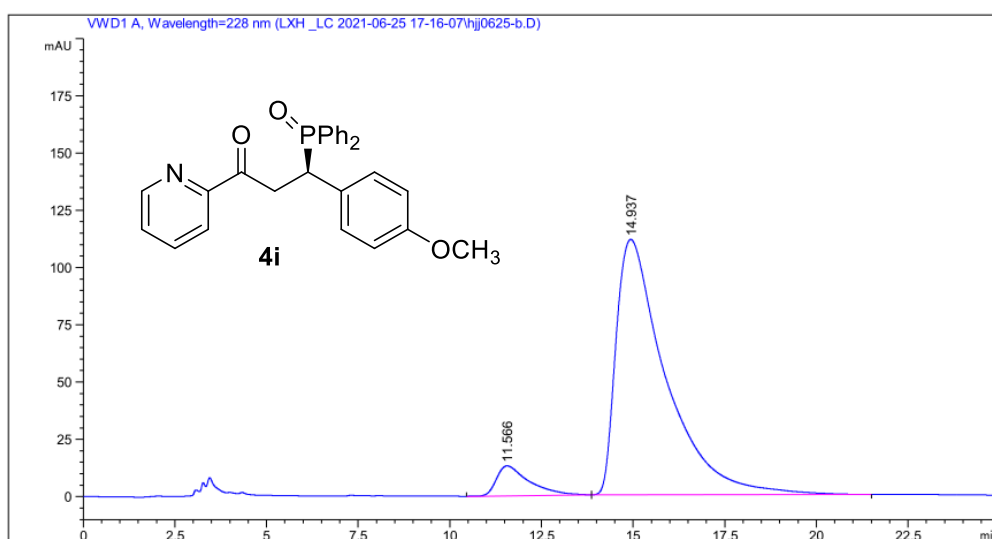

| PeakNO. | Ret.Time | PeakArea  | PeakHeight | Area%   |
|---------|----------|-----------|------------|---------|
| 1       | 11.566   | 806.14996 | 13.07797   | 7.1100  |
| 2       | 14.937   | 1.05321e4 | 111.46671  | 92.8900 |

Chiral HPLC chromatogram for enantioenriched **4i**

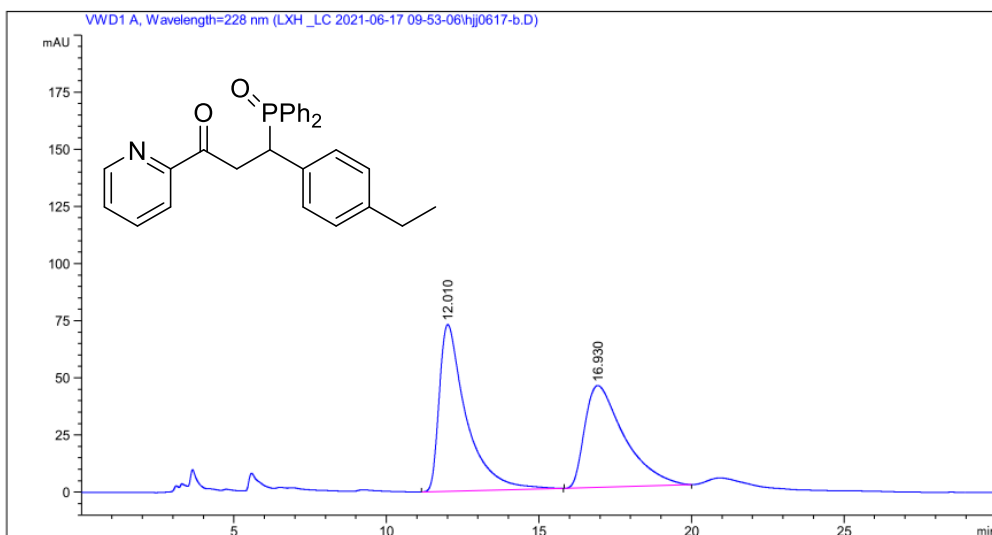

| PeakNO. | Ret.Time | PeakArea   | PeakHeight | Area%   |
|---------|----------|------------|------------|---------|
| 1       | 12.010   | 4493.66455 | 72.98086   | 52.8322 |
| 2       | 16.930   | 4011.88037 | 44.59854   | 47.1678 |

Chiral HPLC chromatogram for racemic **4j**

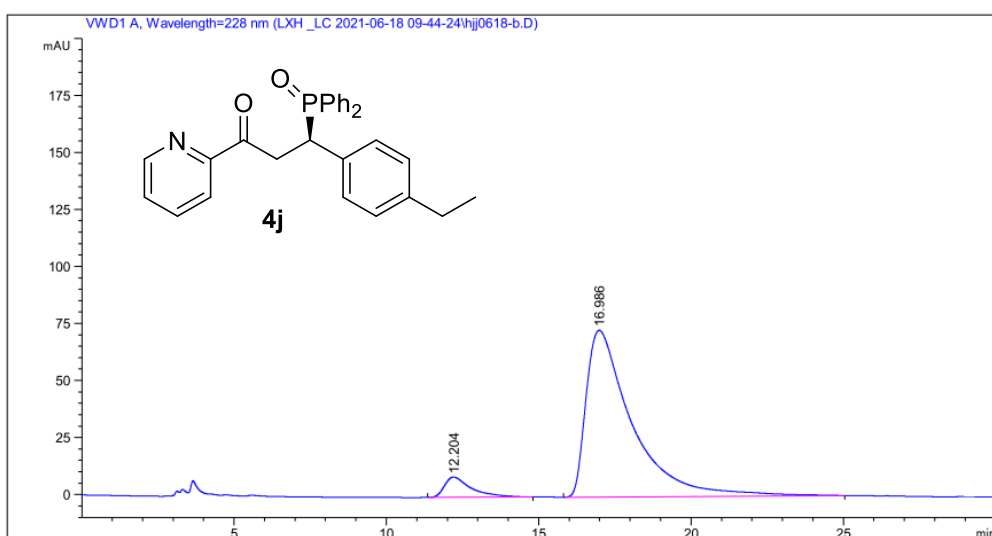

| PeakNO. | Ret.Time | PeakArea   | PeakHeight | Area%   |
|---------|----------|------------|------------|---------|
| 1       | 12.204   | 540.19489  | 8.89561    | 6.5767  |
| 2       | 16.986   | 7673.62354 | 73.10091   | 93.4233 |

Chiral HPLC chromatogram for enantioenriched **4j**

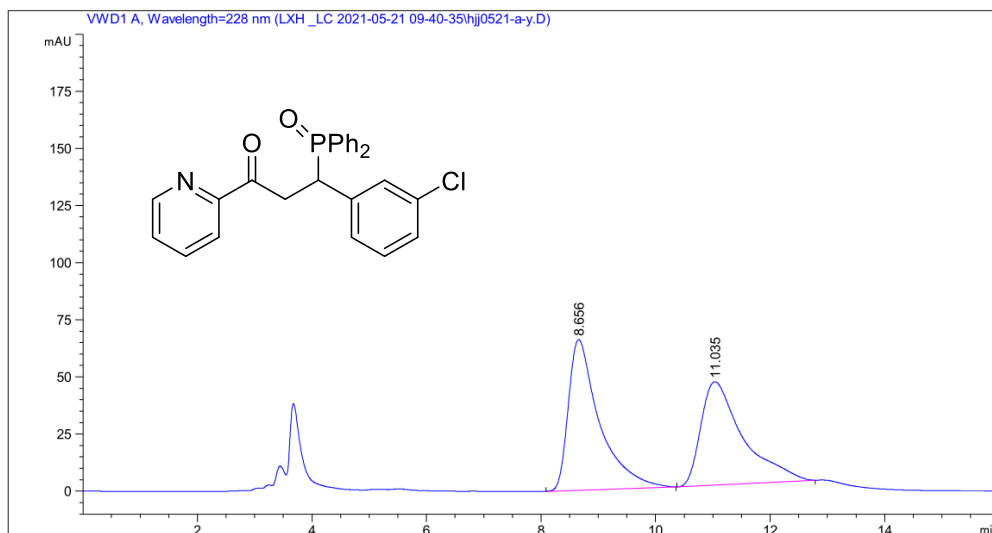

| PeakNO. | Ret.Time | PeakArea   | PeakHeight | Area%   |
|---------|----------|------------|------------|---------|
| 1       | 8.656    | 2486.69409 | 65.91425   | 51.9093 |
| 2       | 11.035   | 2303.76978 | 45.26632   | 48.0907 |

Chiral HPLC chromatogram for racemic **4k**

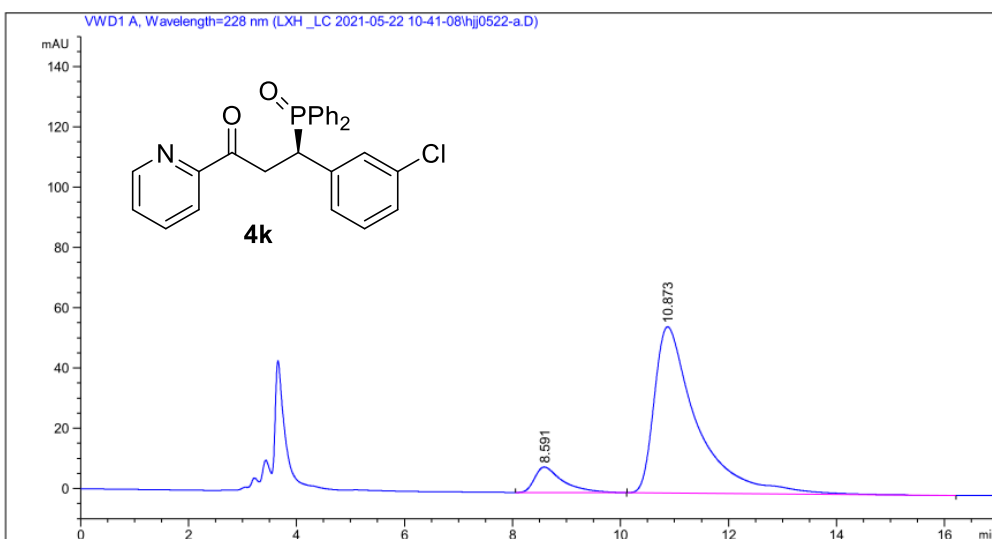

| PeakNO. | Ret.Time | PeakArea   | PeakHeight | Area%   |
|---------|----------|------------|------------|---------|
| 1       | 8.591    | 307.52338  | 8.46919    | 9.2396  |
| 2       | 10.873   | 3020.80786 | 55.16140   | 90.7604 |

Chiral HPLC chromatogram for enantioenriched **4k**

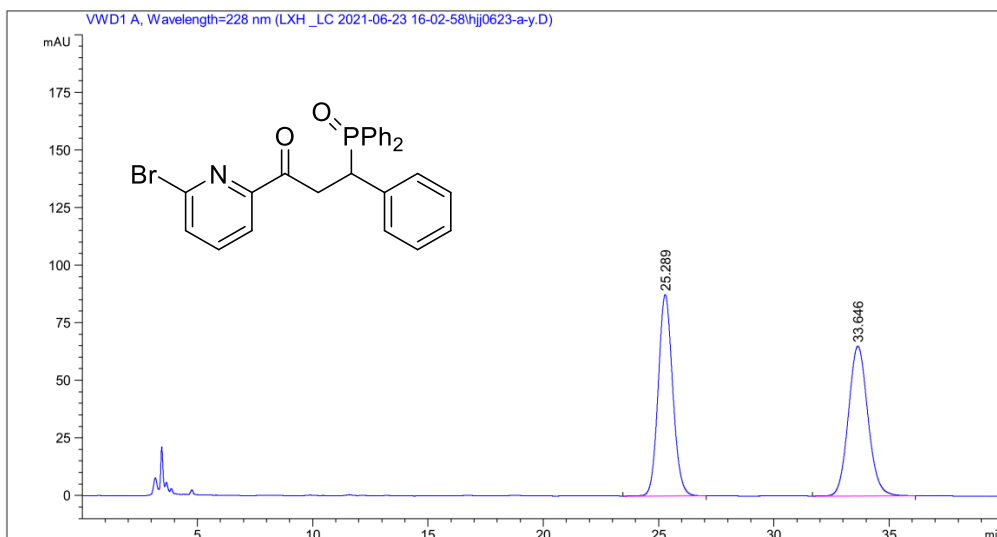

Chiral HPLC chromatogram for racemic **4I**

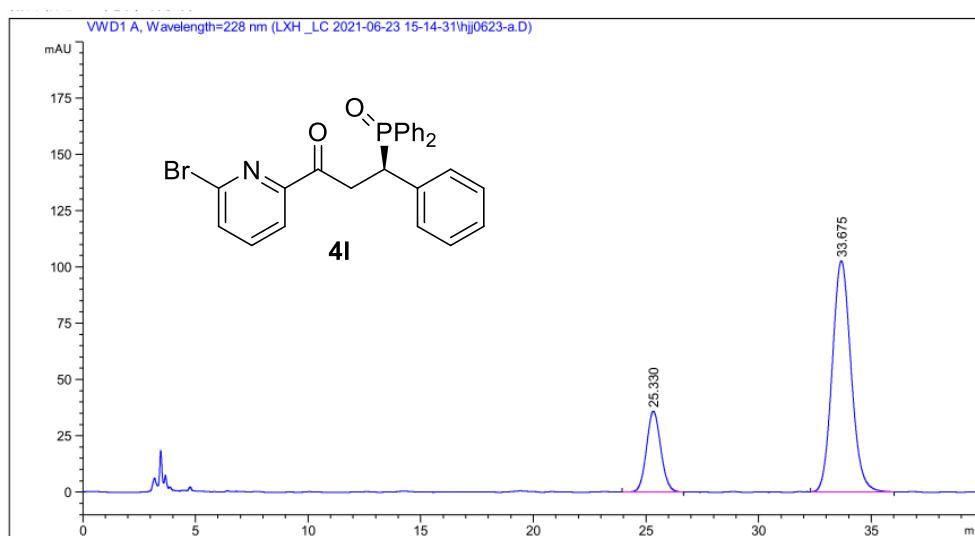

Chiral HPLC chromatogram for enantioenriched **4I**

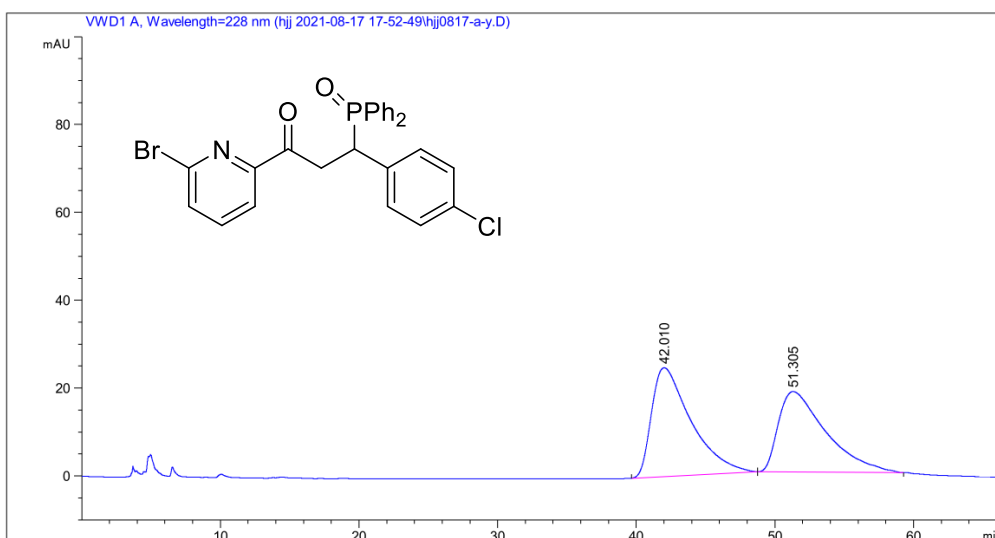

| PeakNO. | Ret.Time | PeakArea   | PeakHeight | Area%   |
|---------|----------|------------|------------|---------|
| 1       | 42.010   | 4905.75342 | 24.76257   | 52.8728 |
| 2       | 51.3051  | 4372.64990 | 18.33787   | 47.1272 |

Chiral HPLC chromatogram for racemic **4m**

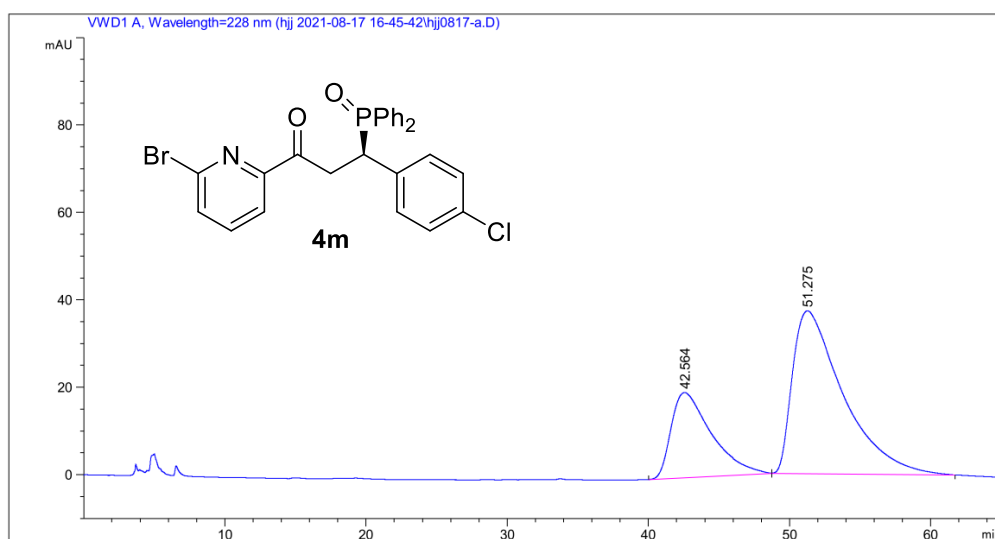

| PeakNO. | Ret.Time | PeakArea   | PeakHeight | Area%   |
|---------|----------|------------|------------|---------|
| 1       | 42.564   | 3842.41357 | 19.47927   | 29.2509 |
| 2       | 51.275   | 9293.63477 | 37.23388   | 70.7491 |

Chiral HPLC chromatogram for enantioenriched **4m**

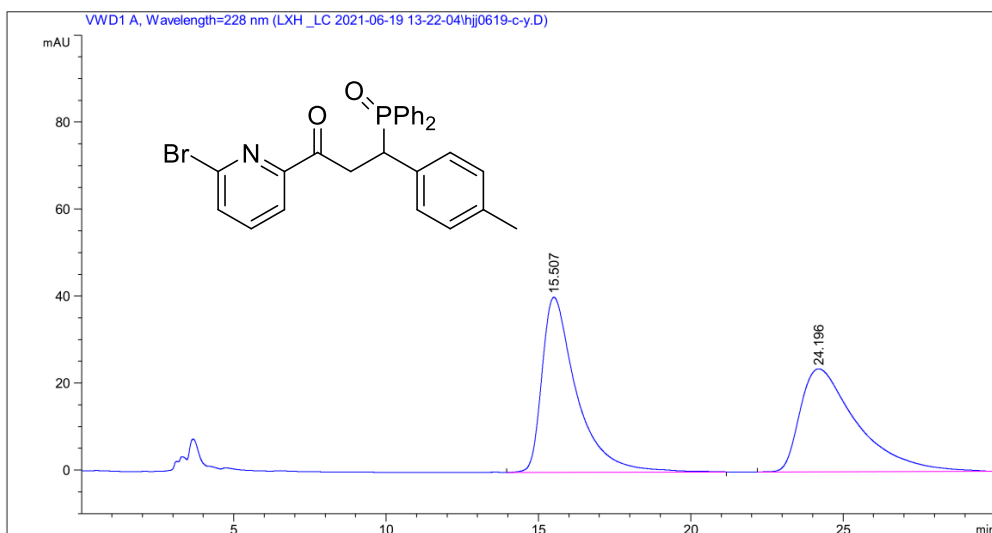

Chiral HPLC chromatogram for racemic **4n**

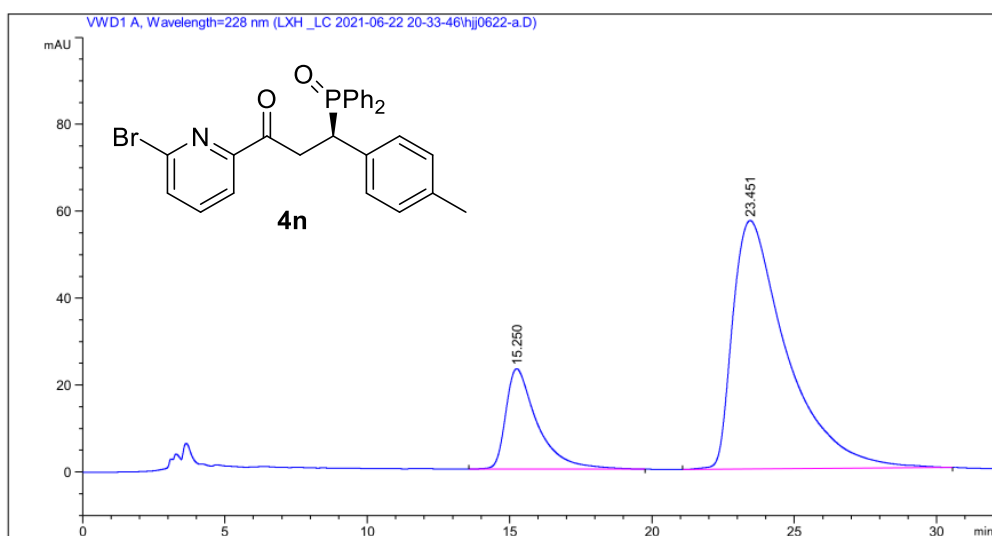

Chiral HPLC chromatogram for enantioenriched **4n**

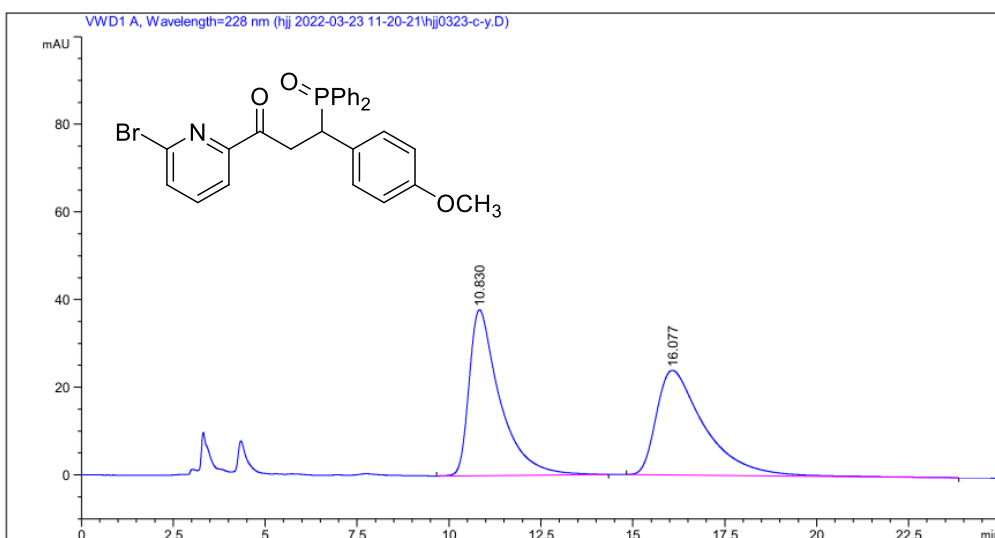

Chiral HPLC chromatogram for racemic **4o**

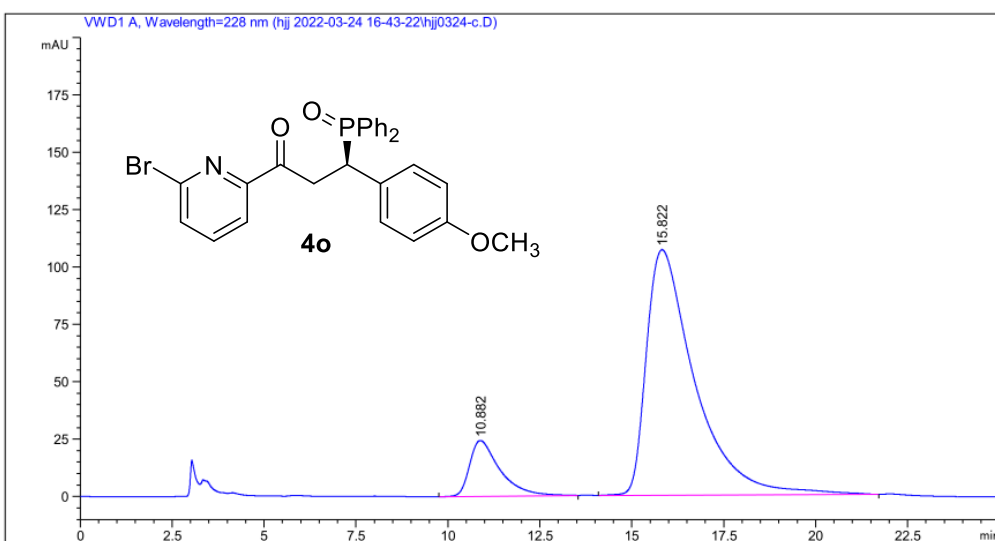

Chiral HPLC chromatogram for enantioenriched **4o**

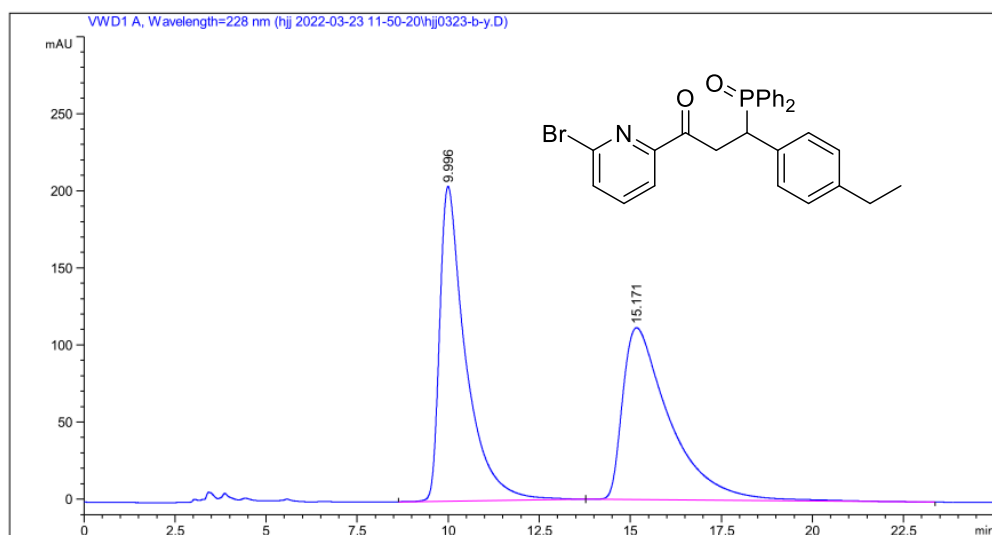

| PeakNO. | Ret.Time | PeakArea  | PeakHeight | Area%   |
|---------|----------|-----------|------------|---------|
| 1       | 9.996    | 1.01281e4 | 204.05437  | 50.2544 |
| 2       | 15.171   | 1.00255e4 | 111.44259  | 49.7456 |

Chiral HPLC chromatogram for racemic **4p**

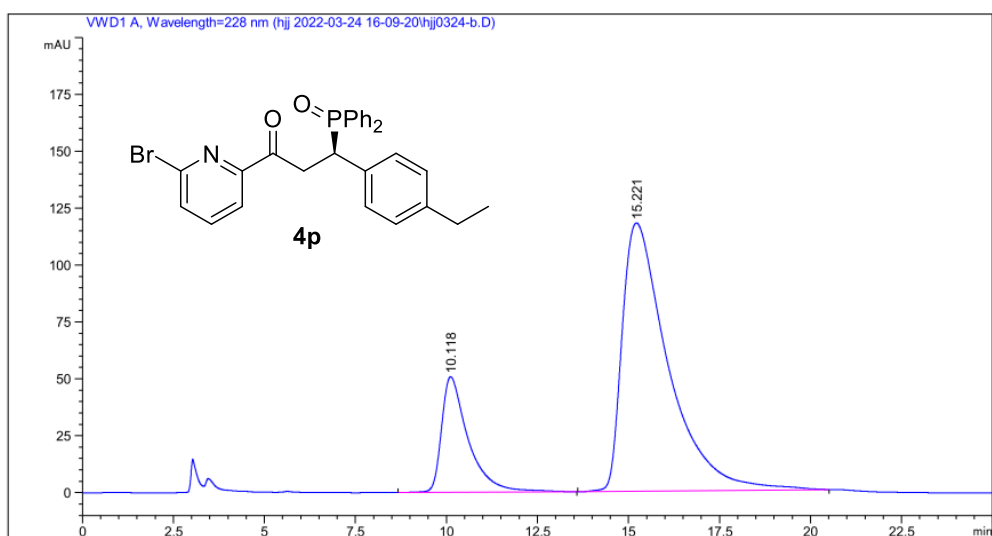

| PeakNO. | Ret.Time | PeakArea   | PeakHeight | Area%   |
|---------|----------|------------|------------|---------|
| 1       | 10.118   | 2590.84888 | 50.73385   | 19.9893 |
| 2       | 15.221   | 1.03703e4  | 117.92656  | 80.0107 |

Chiral HPLC chromatogram for enantioenriched **4p**



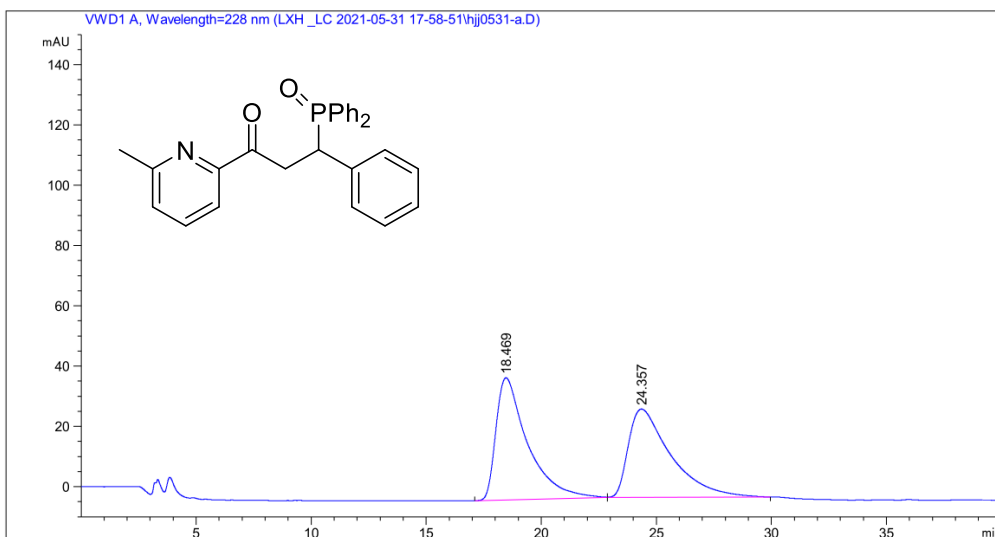

| PeakNO. | Ret.Time | PeakArea   | PeakHeight | Area%   |
|---------|----------|------------|------------|---------|
| 1       | 18.469   | 3860.53613 | 40.51168   | 50.7978 |
| 2       | 24.357   | 3739.28101 | 29.25183   | 49.2022 |

Chiral HPLC chromatogram for racemic **4q**

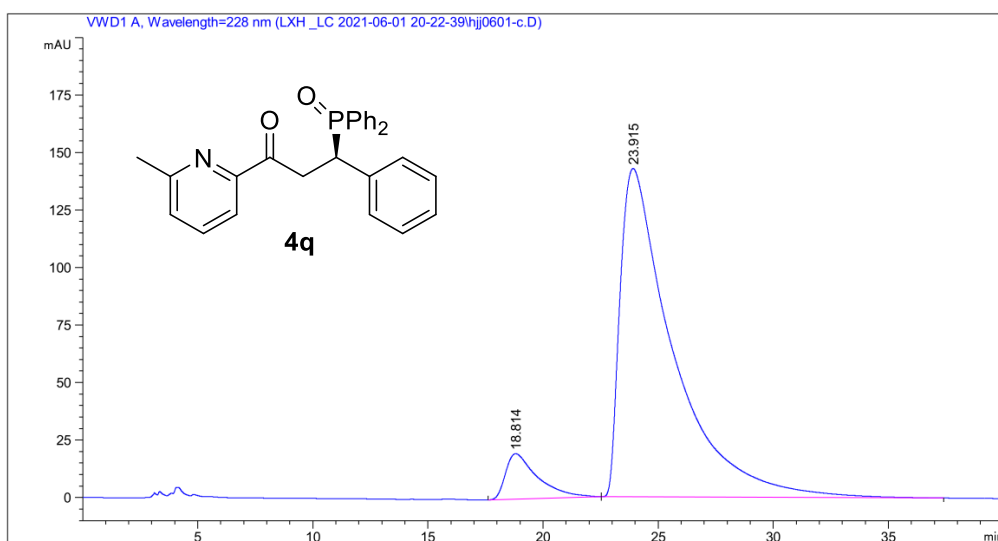

| PeakNO. | Ret.Time | PeakArea   | PeakHeight | Area%   |
|---------|----------|------------|------------|---------|
| 1       | 18.814   | 1915.61938 | 19.78741   | 7.7345  |
| 2       | 23.915   | 2.28515e4  | 142.73439  | 92.2655 |

Chiral HPLC chromatogram for enantioenriched **4q**

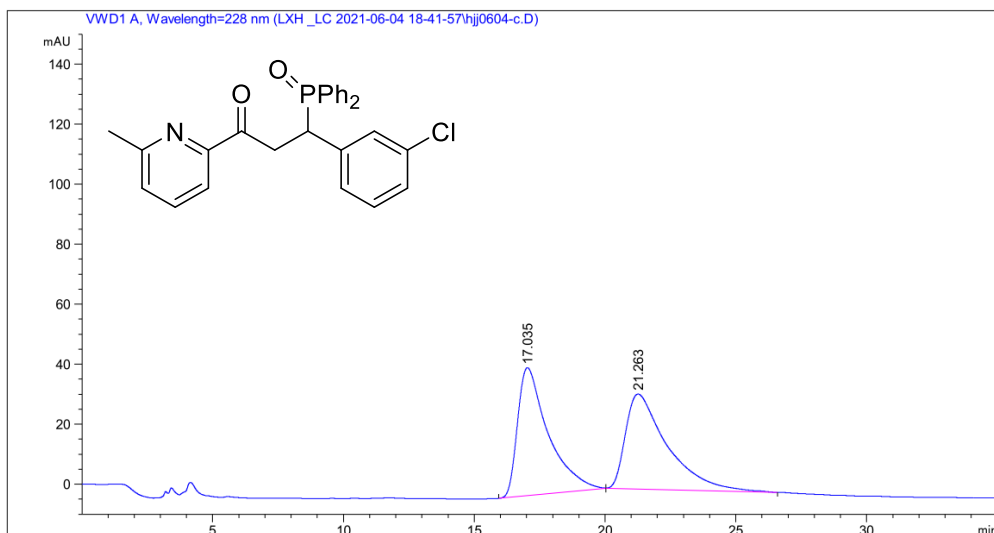

Chiral HPLC chromatogram for racemic **4r**

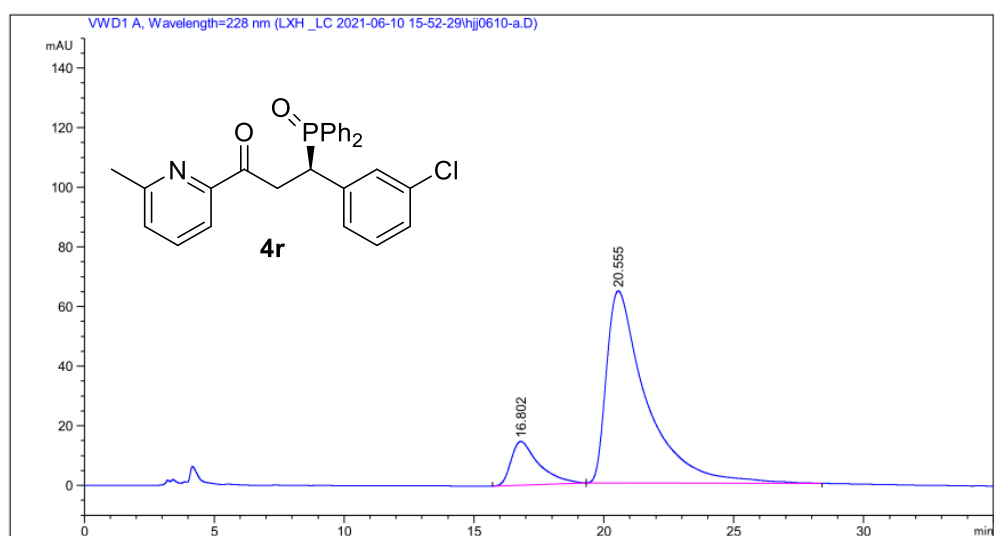

Chiral HPLC chromatogram for enantioenriched **4r**

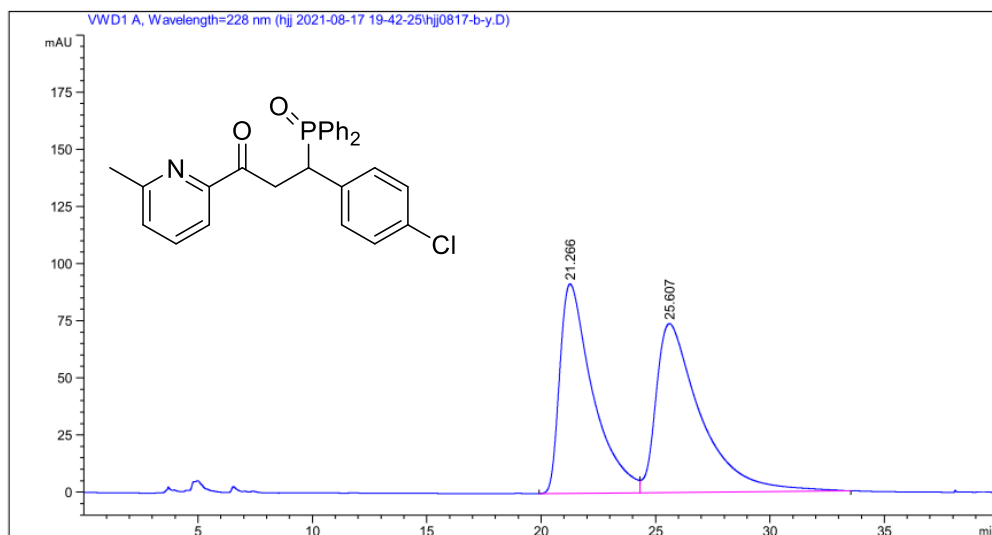

Chiral HPLC chromatogram for racemic **4s**

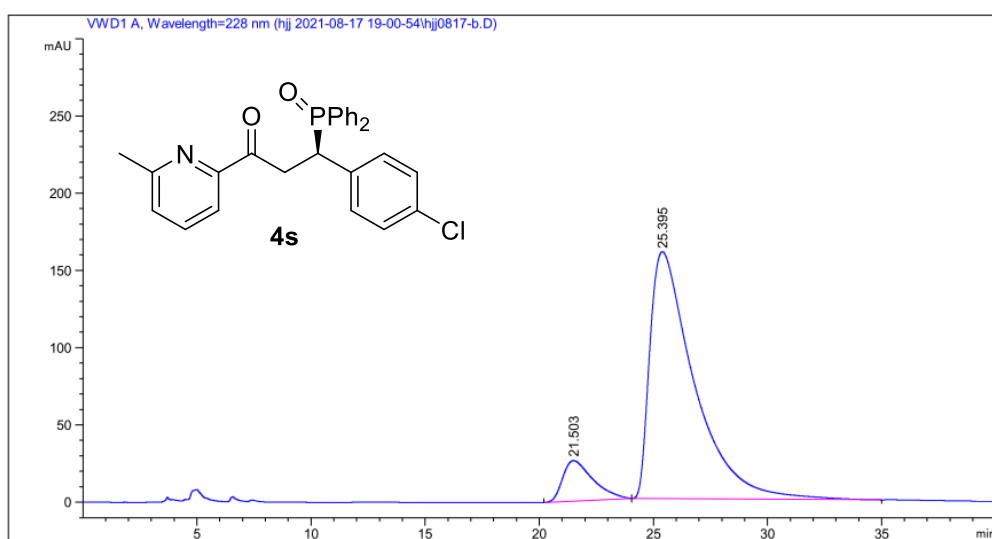

Chiral HPLC chromatogram for enantioenriched **4s**

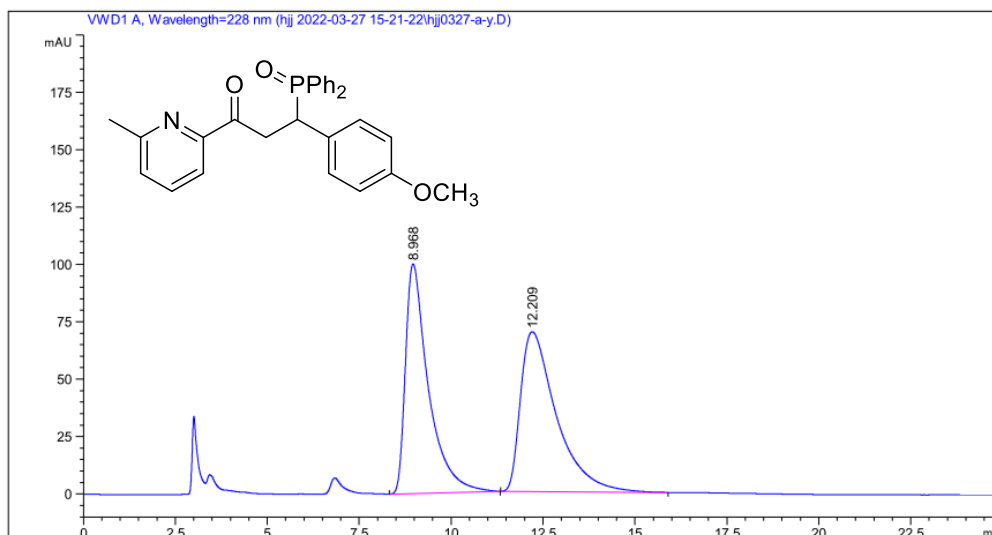

Chiral HPLC chromatogram for racemic **4t**

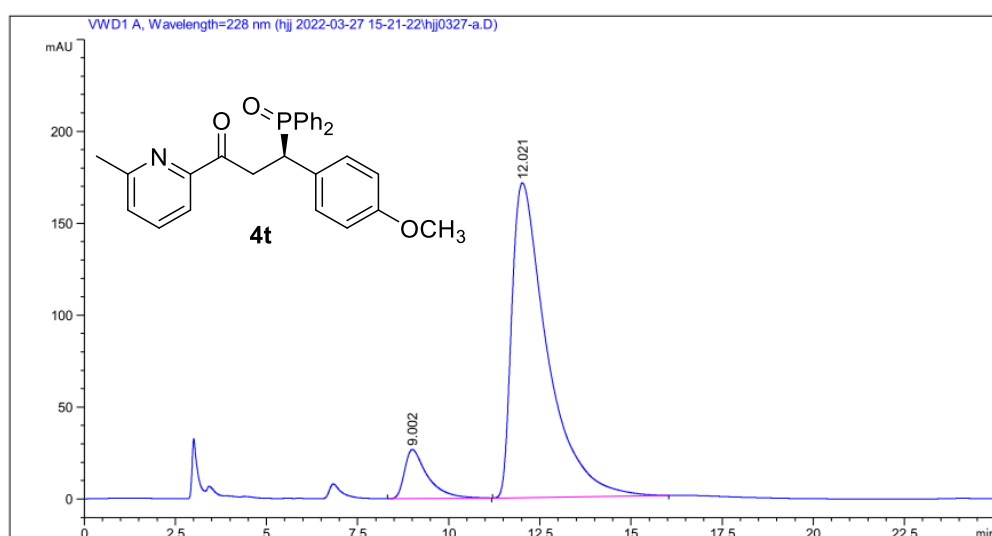

Chiral HPLC chromatogram for enantioenriched **4t**

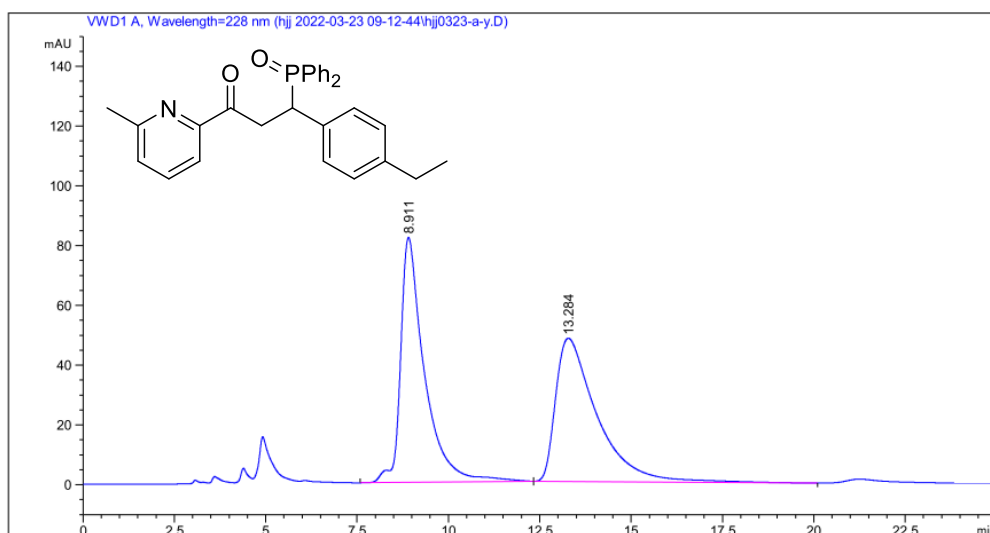

| PeakNO. | Ret.Time | PeakArea   | PeakHeight | Area%   |
|---------|----------|------------|------------|---------|
| 1       | 8.911    | 3729.27075 | 81.94225   | 49.7325 |
| 2       | 13.284   | 3769.39185 | 47.94542   | 50.2675 |

Chiral HPLC chromatogram for racemic **4u**

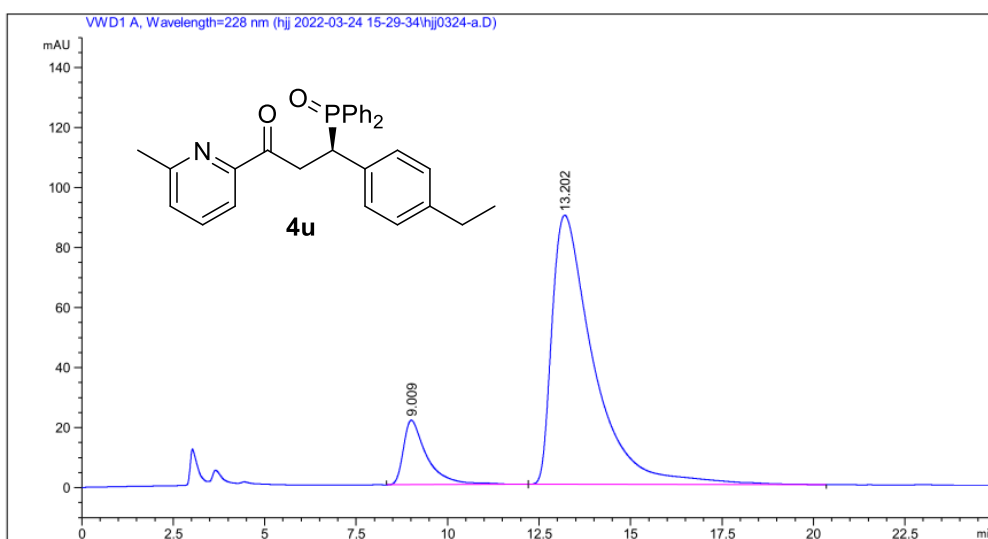

| PeakNO. | Ret.Time | PeakArea   | PeakHeight | Area%   |
|---------|----------|------------|------------|---------|
| 1       | 9.009    | 962.50079  | 21.51051   | 11.9458 |
| 2       | 13.202   | 7094.70605 | 89.74668   | 88.0542 |

Chiral HPLC chromatogram for enantioenriched **4u**

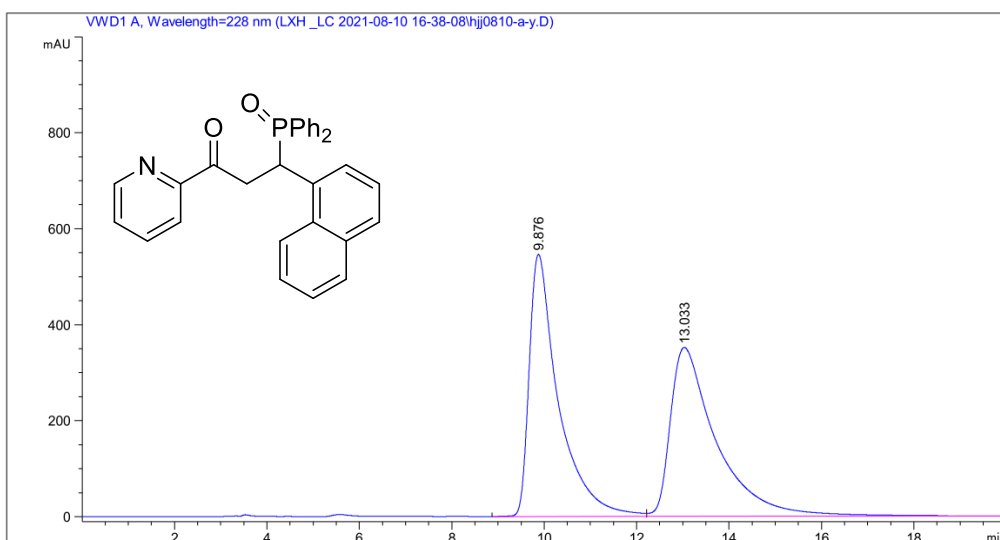

| PeakNO. | Ret.Time | PeakArea  | PeakHeight | Area%   |
|---------|----------|-----------|------------|---------|
| 1       | 9.876    | 2.39921e4 | 545.91876  | 49.6591 |
| 2       | 13.033   | 2.43214e4 | 351.67474  | 50.3409 |

Chiral HPLC chromatogram for racemic **4v**

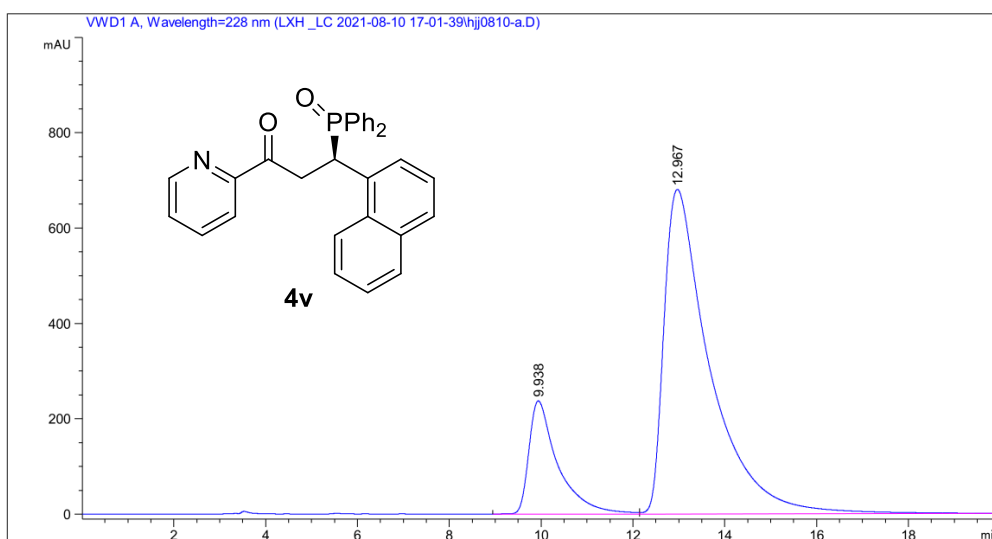

| PeakNO. | Ret.Time | PeakArea  | PeakHeight | Area%   |
|---------|----------|-----------|------------|---------|
| 1       | 9.938    | 1.04670e4 | 237.66782  | 18.0997 |
| 2       | 12.967   | 4.73628e4 | 680.71143  | 81.9003 |

Chiral HPLC chromatogram for enantioenriched **4v**

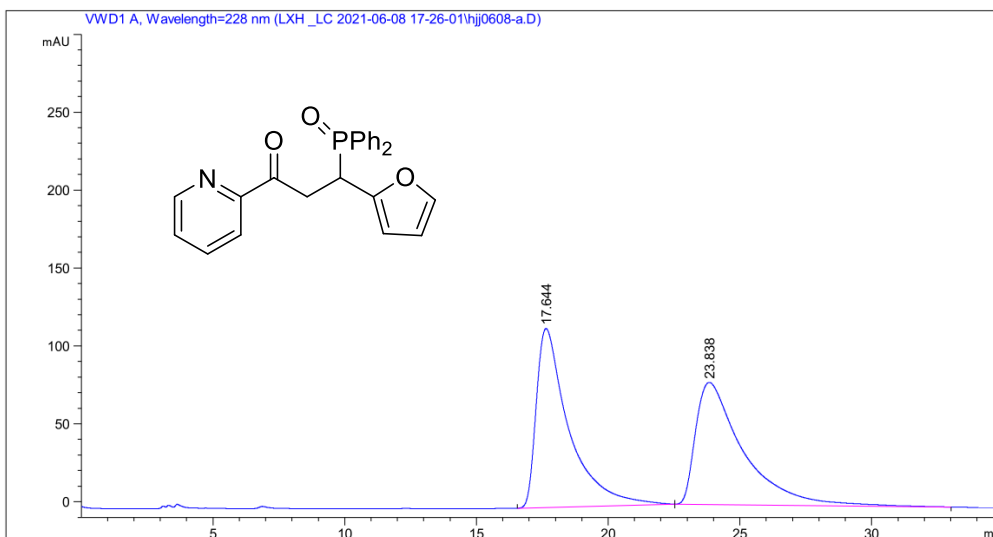

Chiral HPLC chromatogram for racemic **4w**

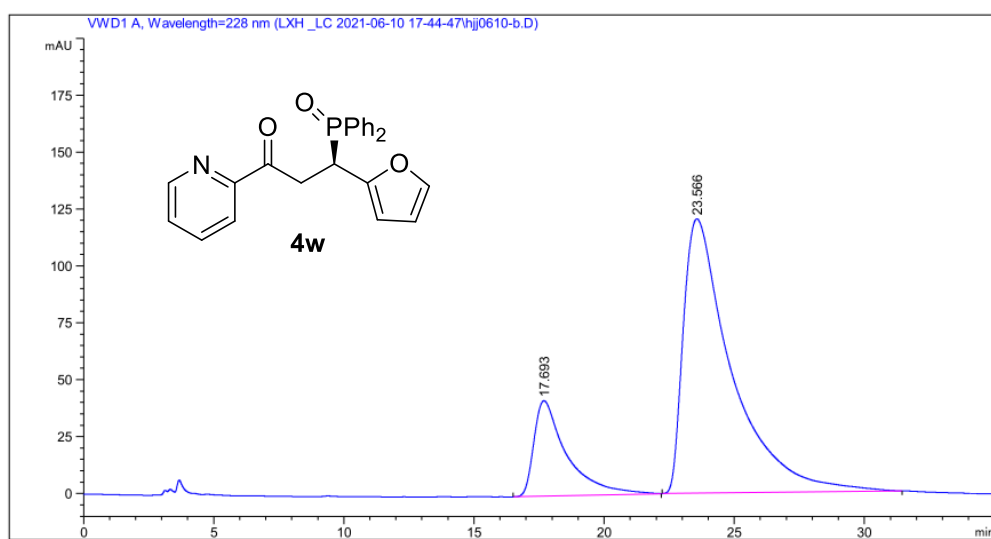

Chiral HPLC chromatogram for enantioenriched **4w**

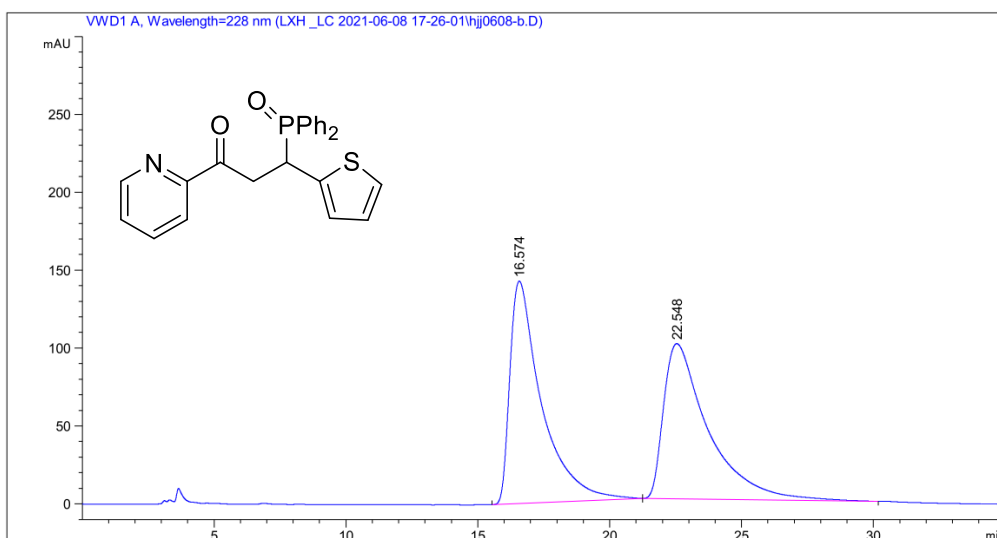

Chiral HPLC chromatogram for racemic **4x**

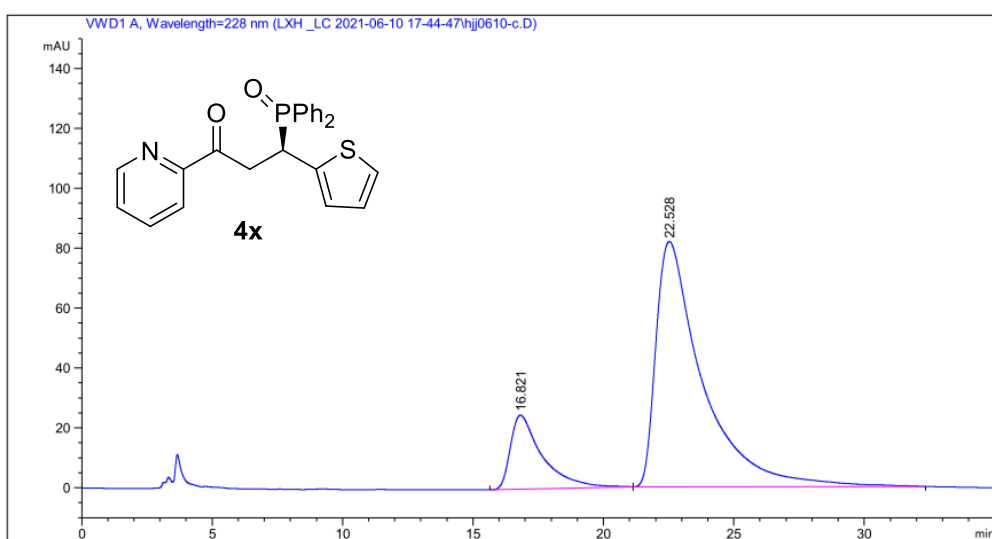

Chiral HPLC chromatogram for enantioenriched **4x**



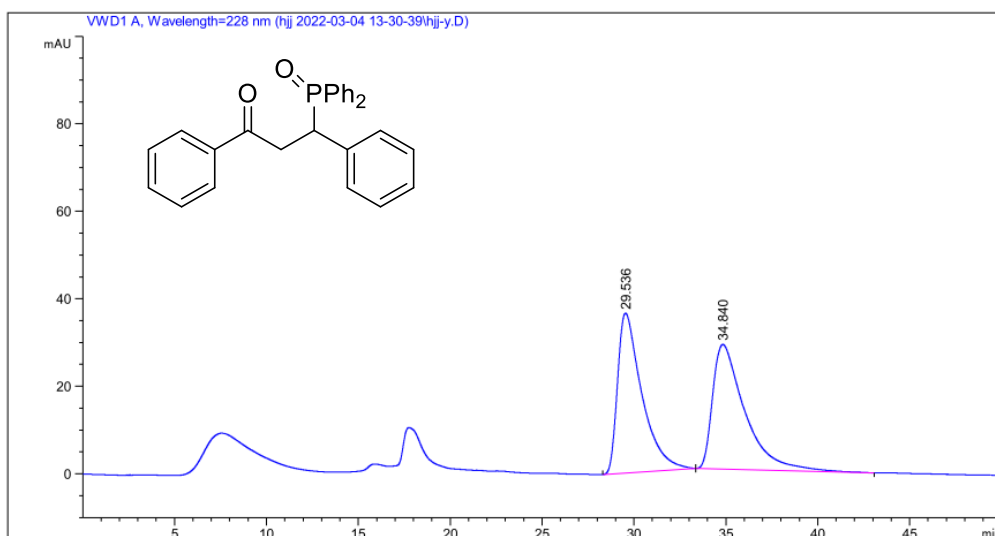

| PeakNO. | Ret.Time | PeakArea   | PeakHeight | Area%   |
|---------|----------|------------|------------|---------|
| 1       | 29.536   | 3362.55151 | 149.61864  | 48.3184 |
| 2       | 34.840   | 3478.23486 | 102.04332  | 51.6816 |

Chiral HPLC chromatogram for racemic **5a**

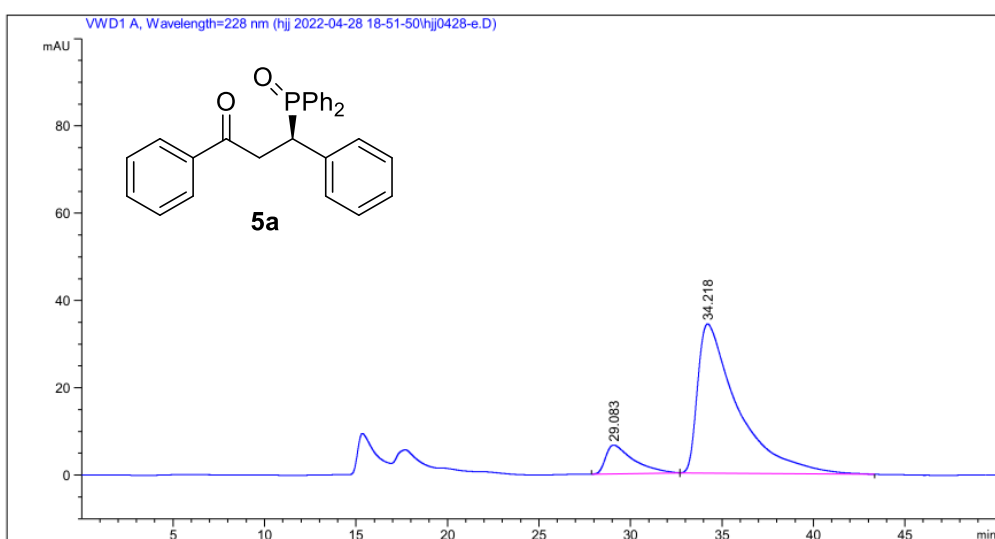

| PeakNO. | Ret.Time | PeakArea   | PeakHeight | Area%   |
|---------|----------|------------|------------|---------|
| 1       | 29.083   | 686.48273  | 6.56768    | 11.6566 |
| 2       | 34.218   | 5202.76123 | 34.14554   | 88.3434 |

Chiral HPLC chromatogram for enantioenriched **5a**

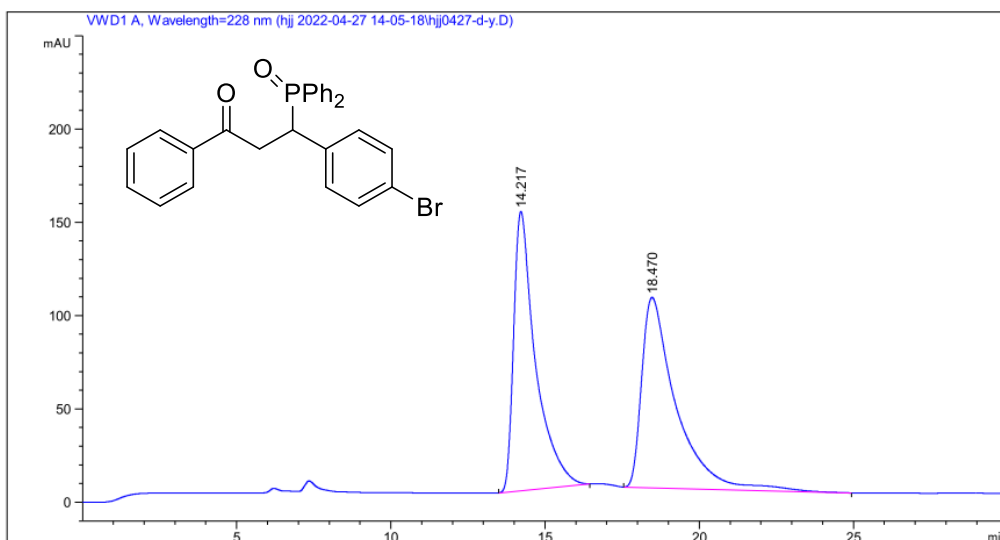

Chiral HPLC chromatogram for racemic **5b**

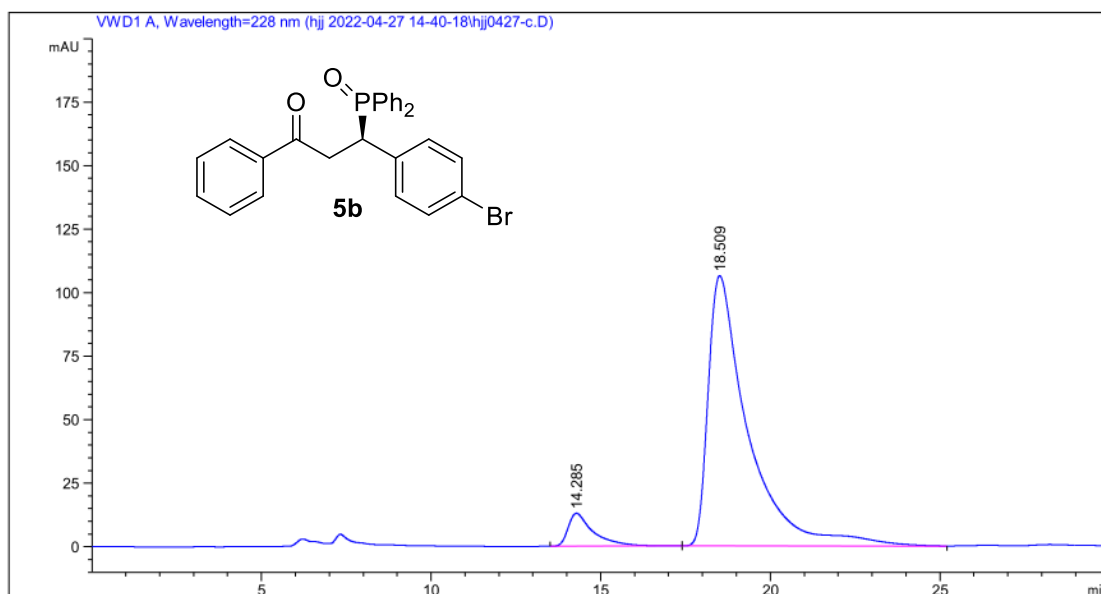

Chiral HPLC chromatogram for enantioenriched **5b**

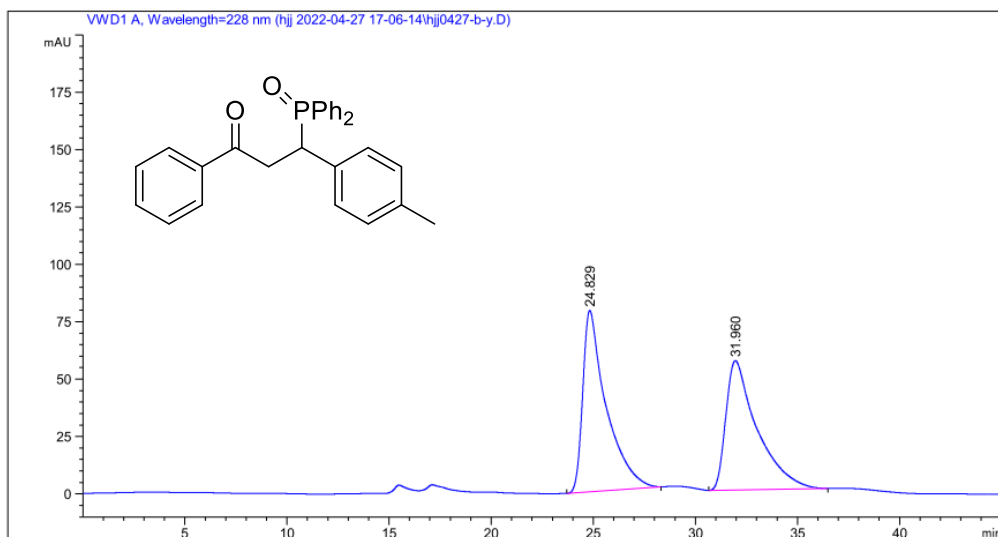

| PeakNO. | Ret.Time | PeakArea   | PeakHeight | Area%   |
|---------|----------|------------|------------|---------|
| 1       | 24.829   | 6301.59131 | 78.94345   | 51.3500 |
| 2       | 31.960   | 5970.25342 | 56.35709   | 48.6500 |

Chiral HPLC chromatogram for racemic **5c**

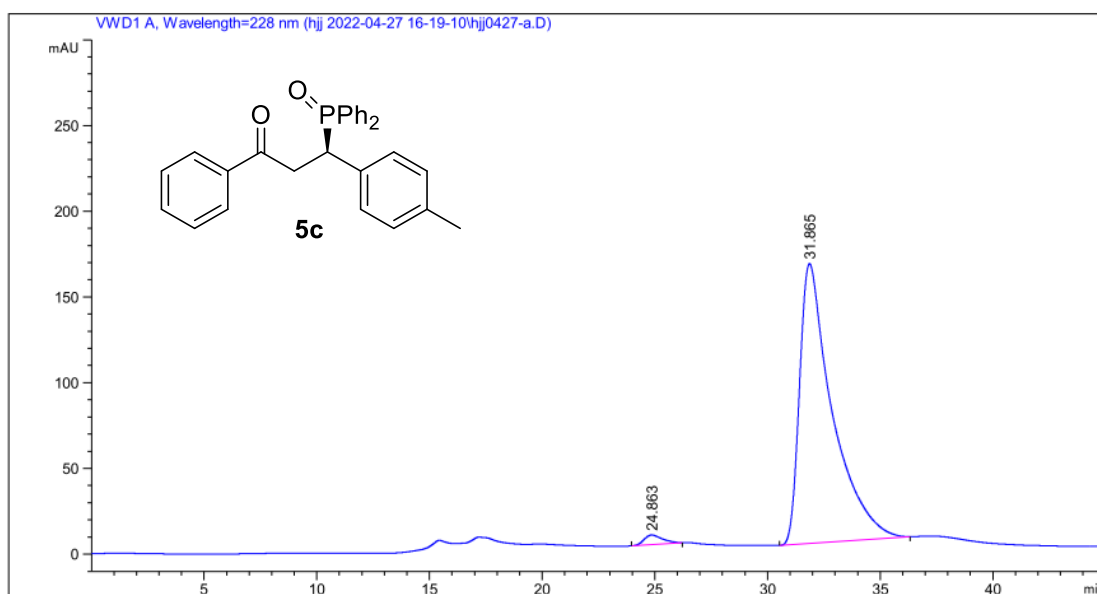

| PeakNO. | Ret.Time | PeakArea  | PeakHeight | Area%   |
|---------|----------|-----------|------------|---------|
| 1       | 24.863   | 316.61862 | 5.62219    | 1.8914  |
| 2       | 31.865   | 1.64237e4 | 163.20700  | 98.1086 |

Chiral HPLC chromatogram for enantioenriched **5c**

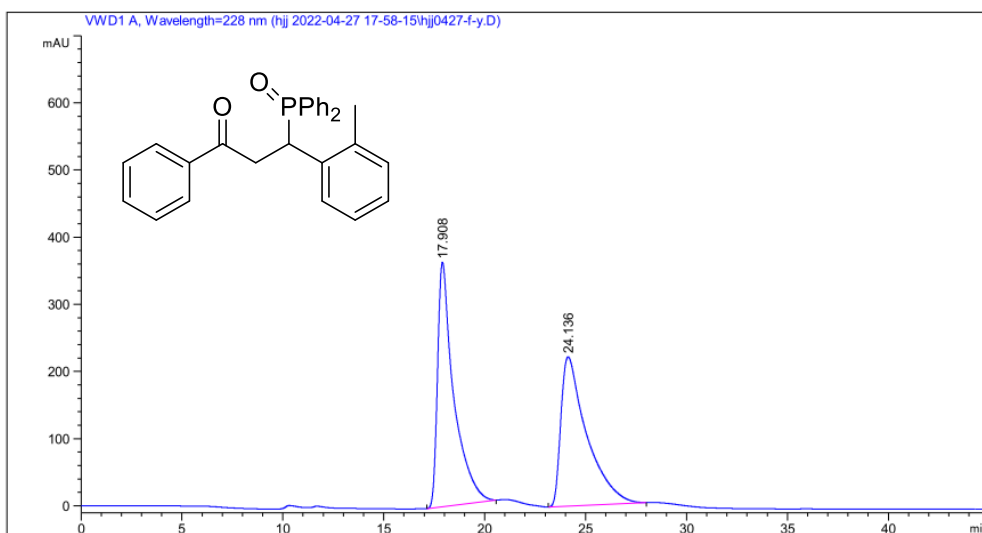

Chiral HPLC chromatogram for racemic **5d**

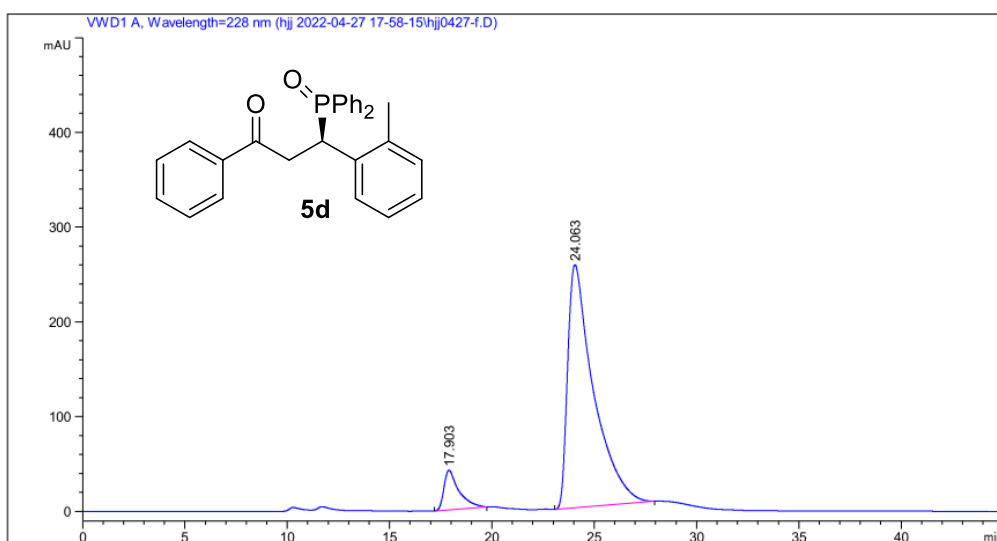

Chiral HPLC chromatogram for enantioenriched **5d**
